# Supplementary material for: Molecular design of chiral zirconium metal–organic frameworks for asymmetric transfer hydrogenation of imines
Source: Royal Society of Chemistry journal article supplement (doi:10.1039/c9cy00770a), 2019-01-01
Supplement: c9cy00770a1.pdf [file c9cy00770a1.pdf]

## Electronic supplementary information

### Molecular design of chiral zirconium metal-organic frameworks for asymmetric transfer hydrogenation of imines

Xu Li and Jianwen Jiang\*

Department of Chemical and Biomolecular Engineering, National University of Singapore, 117576, Singapore

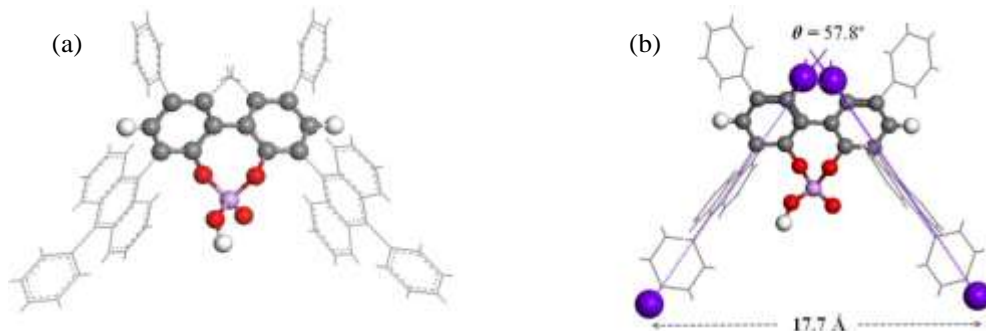

Fig. S1. (a) A chiral phosphoric acid L1A2 (b) Distance and angle between two chiral axes on L1A2. L1 and A2 are represented by the ball-stick and line, respectively.

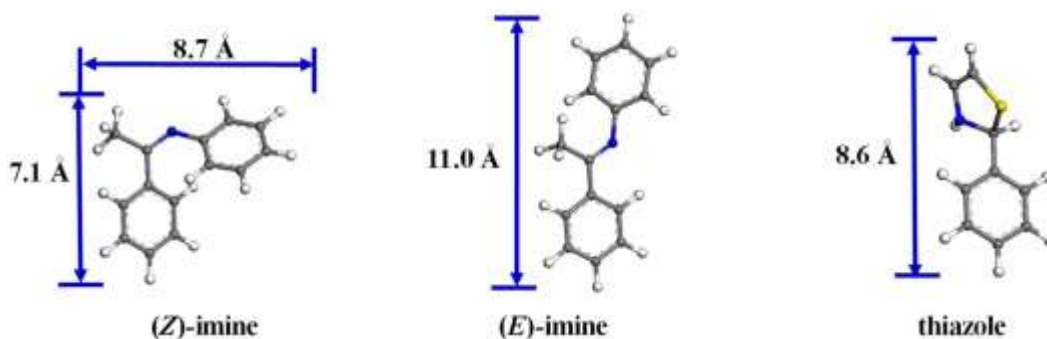

Fig. S2. (Z)- and (E)-imines and thiazole.

Table S1. Electronic energies ( $E^{\text{ele}}$ ) and thermal corrections at 25 °C ( $G^{\text{therm}}$ ) of isolated catalysts in different solvents. The unit is in Hartree.

| Isolated catalyst | Dichloromethane    |                  | Toluene            |                  | Acetonitrile       |                  |
|-------------------|--------------------|------------------|--------------------|------------------|--------------------|------------------|
|                   | $G^{\text{therm}}$ | $E^{\text{ele}}$ | $G^{\text{therm}}$ | $E^{\text{ele}}$ | $G^{\text{therm}}$ | $E^{\text{ele}}$ |
| L1A2              | 0.87922            | -1183.65043      |                    |                  |                    |                  |
| MOF-fcu           | 3.89931            | -1074.49786      | 3.89931            | -1074.49344      | 3.89931            | -1074.49912      |
| MOF-bct           | 5.80403            | -1064.16181      | 5.80403            | -1064.15742      | 5.80403            | -1064.16307      |

Table S2. Electronic energies ( $E^{\text{ele}}$ ) and thermal corrections at 25 °C ( $G^{\text{therm}}$ ) of intermediates, transition states and products for the ATH on L1A2 in dichloromethane. The unit is in Hartree.

| Intermediate/<br>transition state/product | $G^{\text{therm}}$ | $E^{\text{ele}}$ |
|-------------------------------------------|--------------------|------------------|
| co-ad                                     | 1.25003            | -2581.38552      |
| (Z)-syn-TS-R                              | 1.25262            | -2581.35725      |
| product                                   | 1.24967            | -2581.41892      |
| co-ad                                     | 1.24781            | -2581.37635      |
| (Z)-anti-TS-R                             | 1.25161            | -2581.34374      |
| product                                   | 1.24643            | -2581.40837      |
| co-ad                                     | 1.25169            | -2581.37762      |
| (E)-syn-TS-S                              | 1.24751            | -2581.34251      |
| product                                   | 1.24569            | -2581.40912      |
| co-ad                                     | 1.24692            | -2581.37982      |
| (E)-anti-TS-S                             | 1.25078            | -2581.34286      |
| product                                   | 1.25042            | -2581.41592      |

Table S3. Electronic energies ( $E^{\text{ele}}$ ) and thermal corrections at 25 °C ( $G^{\text{therm}}$ ) of intermediates, transition states and products for the ATH on MOFs in different solvents. The unit is in Hartree.

| Dichloromethane | Intermediate/<br>transition state/product | $G^{\text{therm}}$ | $E^{\text{ele}}$           |
|-----------------|-------------------------------------------|--------------------|----------------------------|
| MOF-fcu         | co-ad                                     | 4.27330            | -2472.00796                |
|                 | (Z)-syn-TS-R                              | 4.27249            | -2471.98332                |
|                 | product                                   | 4.27769            | -2472.03909                |
|                 | co-ad                                     | 4.27003            | -2472.00059                |
|                 | (E)-syn-TS-S<br>product                   | 4.27112<br>4.27290 | -2471.97981<br>-2472.03277 |
| MOF-bct         | co-ad                                     | 6.17419            | -2461.66024                |
|                 | (Z)-syn-TS-R                              | 6.17507            | -2461.63085                |
|                 | product                                   | 6.16991            | -2461.68925                |
|                 | co-ad                                     | 6.17461            | -2461.66034                |
|                 | (E)-syn-TS-S<br>product                   | 6.17345<br>6.16990 | -2461.62520<br>-2461.68159 |
| Toluene         | Intermediate/<br>transition state/product | $G^{\text{therm}}$ | $E^{\text{ele}}$           |
| MOF-fcu         | co-ad                                     | 4.27330            | -2471.99907                |
|                 | (Z)-syn-TS-R                              | 4.27249            | -2471.97592                |
|                 | product                                   | 4.27769            | -2472.03288                |
|                 | co-ad                                     | 4.27003            | -2472.00059                |
|                 | (E)-syn-TS-S<br>product                   | 4.27112<br>4.27290 | -2471.97188<br>-2472.02670 |
| MOF-bct         | co-ad                                     | 6.17419            | -2461.65153                |
|                 | (Z)-syn-TS-R                              | 6.17507            | -2461.62331                |
|                 | product                                   | 6.16991            | -2461.68334                |
|                 | co-ad                                     | 6.17461            | -2461.65098                |
|                 | (E)-syn-TS-S<br>product                   | 6.17345<br>6.16990 | -2461.61684<br>-2461.67577 |
| Acetonitrile    | Intermediate/<br>transition state/product | $G^{\text{therm}}$ | $E^{\text{ele}}$           |
| MOF-fcu         | co-ad                                     | 4.27330            | -2472.01057                |
|                 | (Z)-syn-TS-R                              | 4.27249            | -2471.98549                |
|                 | product                                   | 4.27769            | -2472.04090                |
|                 | co-ad                                     | 4.27003            | -2472.01393                |
|                 | (E)-syn-TS-S<br>product                   | 4.27112<br>4.27290 | -2471.98218<br>-2472.03454 |
| MOF-bct         | co-ad                                     | 6.17419            | -2461.66280                |
|                 | (Z)-syn-TS-R                              | 6.17507            | -2461.63307                |
|                 | product                                   | 6.16991            | -2461.69097                |
|                 | co-ad                                     | 6.17461            | -2461.66313                |
|                 | (E)-syn-TS-S<br>product                   | 6.17345<br>6.16990 | -2461.62771<br>-2461.68332 |

Table S4. Selected bond distances (Å) of optimized transition states on L1A2.

| Bond <sup>a</sup> | (Z)-anti-TS-R | (Z)-syn-TS-R | (E)-anti-TS-S | (E)-syn-TS-S |
|-------------------|---------------|--------------|---------------|--------------|
| O1-H1             | 1.73          | 1.69         | 1.81          | 1.77         |
| O2-H2             | 1.62          | 1.61         | 1.60          | 1.63         |
| C1-H3             | 1.44          | 1.50         | 1.47          | 1.48         |
| C2-H3             | 1.35          | 1.30         | 1.32          | 1.31         |

<sup>a</sup>O1 and O2: O atoms of L1A2; C1: C atom of imine; H2, H3 and C2: H and C atoms of thiazole.

Table S5. Selected bond distances (Å) of optimized transition states on MOF-fcu and MOF-bct.

| Bond <sup>a</sup> | MOF-fcu      |              | MOF-bct      |              |
|-------------------|--------------|--------------|--------------|--------------|
|                   | (Z)-syn-TS-R | (E)-syn-TS-S | (Z)-syn-TS-R | (E)-syn-TS-S |
| O1-H1             | 1.70         | 1.83         | 1.75         | 1.76         |
| O2-H2             | 1.59         | 1.58         | 1.64         | 1.63         |
| C1-H3             | 1.49         | 1.42         | 1.50         | 1.42         |
| C2-H3             | 1.31         | 1.34         | 1.31         | 1.36         |

<sup>a</sup>O1 and O2: O atoms of chiral phosphoric acid on MOFs;  
C1: C atom of imine; H2, H3 and C2: H and C atoms of thiazole.

Table S6. H-bond distances in optimized transition states.

| Bond <sup>a</sup> | L1A2  |       | MOF-fcu |       | MOF-bct |       |
|-------------------|-------|-------|---------|-------|---------|-------|
|                   | O1-H1 | O2-H2 | O1-H1   | O2-H2 | O1-H1   | O2-H2 |
| (Z)-anti-TS-R     | 1.73  | 1.62  |         |       |         |       |
| (Z)-syn-TS-R      | 1.69  | 1.61  | 1.70    | 1.59  | 1.75    | 1.64  |
| (E)-anti-TS-S     | 1.81  | 1.60  |         |       |         |       |
| (E)-syn-TS-S      | 1.77  | 1.63  | 1.83    | 1.58  | 1.76    | 1.63  |

<sup>a</sup>O1 and O2: O atoms of chiral phosphoric acid on MOFs;  
C1: C atom of imine; H2, H3 and C2: H and C atoms of thiazole.

Table S7. Close distances (C–H··· O < 3.5 Å) between transition states and frameworks.

| MOF-fcu      |              | MOF-bct      |              |
|--------------|--------------|--------------|--------------|
| (Z)-syn-TS-R | (E)-syn-TS-S | (Z)-syn-TS-R | (E)-syn-TS-S |
| 2.67         | 2.83         | 2.65         | 2.61         |
| 2.68         | 2.84         | 2.66         | 2.75         |
| 2.71         | 2.87         | 2.76         | 2.88         |
| 2.73         | 3.04         | 2.77         | 2.91         |
| 2.78         | 3.06         | 2.99         | 2.93         |
| 2.79         | 3.09         | 3.30         | 3.11         |
| 2.80         | 3.21         | 3.36         | 3.12         |
| 2.88         | 3.34         | 3.43         | 3.43         |
| 3.03         | 3.35         | 3.45         | 3.45         |
| 3.05         | 3.50         | 3.47         |              |
| 3.15         |              |              |              |
| 3.16         |              |              |              |
| 3.21         |              |              |              |
| 3.24         |              |              |              |

Coordinates: Optimized transition states on L1A2 and MOFs.

|               |             |             |               |             |             |
|---------------|-------------|-------------|---------------|-------------|-------------|
| On L1A2:      |             |             | H 4.32660000  | -4.17640000 | -2.84920000 |
| (Z)-syn-TS-R  |             |             | H 4.95930000  | -4.62760000 | -1.26620000 |
| C -7.41730000 | -2.12750000 | 1.70300000  | H 0.09990000  | 8.30510000  | -0.85810000 |
| C -8.31140000 | -3.14170000 | 1.34720000  | H 4.31790000  | 9.09320000  | -1.06720000 |
| C -7.84760000 | -4.28400000 | 0.68690000  | H 4.79310000  | 6.70020000  | -0.66220000 |
| C -6.48900000 | -4.41350000 | 0.38100000  | H 0.56020000  | 5.91510000  | -0.44800000 |
| C -5.58920000 | -3.39650000 | 0.73430000  | H 5.87950000  | -0.24640000 | 3.92070000  |
| C -6.05970000 | -2.25420000 | 1.39740000  | H 7.39950000  | -2.81970000 | 0.80760000  |
| C -0.87650000 | -4.36230000 | 2.21530000  | H 9.39880000  | -3.28230000 | 2.18000000  |
| C -1.35850000 | -4.57390000 | 3.44770000  | H 9.65320000  | -2.22880000 | 4.40950000  |
| C -2.72080000 | -4.45010000 | 3.75010000  | H 7.89540000  | -0.70780000 | 5.27090000  |
| C -3.63120000 | -4.11370000 | 2.82610000  | H 4.52400000  | 0.62440000  | -2.15310000 |
| C -4.60290000 | -2.95570000 | -2.01680000 | H 3.45360000  | 5.43080000  | -2.97440000 |
| C -4.11720000 | -2.69450000 | -3.23830000 | H 2.16720000  | 5.99300000  | 2.05860000  |
| C -2.74670000 | -2.74220000 | -3.52420000 | H 1.75570000  | 4.93760000  | 4.15310000  |
| C -1.83320000 | -3.06510000 | -2.59860000 | H 2.08870000  | 2.54340000  | 4.49860000  |
| C 1.12250000  | 7.95330000  | -0.81480000 | H 2.87270000  | 1.10270000  | 2.77180000  |
| C 2.17940000  | 8.85120000  | -0.98970000 | H 0.96130000  | -5.65160000 | -4.13460000 |
| C 3.50040000  | 8.39680000  | -0.93260000 | H 1.65740000  | -7.54140000 | -5.56440000 |
| C 3.76660000  | 7.04330000  | -0.70300000 | H 3.46050000  | -9.07130000 | -4.82020000 |
| C 2.70890000  | 6.13670000  | -0.53150000 | H 4.56290000  | -8.71640000 | -2.62840000 |
| C 1.38520000  | 6.60020000  | -0.58400000 | H 3.86940000  | -6.84360000 | -1.17710000 |
| C 4.27010000  | 1.67070000  | -2.26280000 | H -0.67370000 | -4.85510000 | 4.23800000  |
| C 4.44510000  | 2.24890000  | -3.45900000 | H -3.04760000 | -4.63540000 | 4.76560000  |
| C 4.14800000  | 3.59880000  | -3.68840000 | H 4.82780000  | 1.65390000  | -4.27870000 |
| C 3.67660000  | 4.40200000  | -2.72460000 | H 4.30140000  | 4.00390000  | -4.68070000 |
| C 2.33330000  | 4.92710000  | 2.14270000  | H 4.89900000  | -3.73860000 | 2.51890000  |
| C 2.10470000  | 4.33570000  | 3.32340000  | H 3.67050000  | -4.26180000 | 1.36570000  |
| C 2.30090000  | 2.96290000  | 3.52320000  | H 5.36780000  | -4.23500000 | 0.89300000  |
| C 2.74710000  | 2.15500000  | 2.55170000  | C 3.39110000  | -6.97710000 | -2.13950000 |
| C -2.24400000 | -3.39310000 | -1.21040000 | C 3.78100000  | -8.04330000 | -2.95550000 |
| C -3.69240000 | -3.30940000 | -0.89950000 | C 3.15820000  | -8.24480000 | -4.19030000 |
| C -4.15140000 | -3.52530000 | 0.41400000  | C 2.14140000  | -7.38240000 | -4.60950000 |
| C -3.22450000 | -3.84830000 | 1.42380000  | C 1.74860000  | -6.31470000 | -3.79670000 |
| C -1.78040000 | -3.97020000 | 1.10520000  | C 4.29180000  | -3.92670000 | -1.78260000 |
| C 3.74210000  | 2.44960000  | -1.11550000 | C 4.60030000  | -3.69930000 | 1.46520000  |
| C 3.45270000  | 3.88640000  | -1.35100000 | C 7.49000000  | -2.36610000 | 1.78670000  |
| C 2.98740000  | 4.70130000  | -0.29980000 | C 8.62720000  | -2.62420000 | 2.55810000  |
| C 2.79170000  | 4.13400000  | 0.97460000  | C 8.77170000  | -2.02880000 | 3.81420000  |
| C 3.04500000  | 2.68940000  | 1.19970000  | C 7.78080000  | -1.17100000 | 4.29950000  |
| H -7.77530000 | -1.24420000 | 2.21600000  | C 6.64180000  | -0.91040000 | 3.53160000  |
| H -8.54060000 | -5.06870000 | 0.41280000  | C 4.99230000  | 0.10350000  | 1.13520000  |
| H -6.13790000 | -5.30150000 | -0.13010000 | C 5.27920000  | -1.22760000 | 1.45360000  |
| H -5.37300000 | -1.46850000 | 1.67740000  | C 4.42200000  | -2.25930000 | 1.00690000  |
| H 0.18510000  | -4.48920000 | 2.04830000  | C 3.31620000  | -1.92410000 | 0.18750000  |
| H -4.66850000 | -4.04300000 | 3.12580000  | C 3.02730000  | -0.56770000 | -0.05410000 |
| H -5.67120000 | -2.88430000 | -1.86070000 | C 2.40550000  | -2.96140000 | -0.39060000 |
| H -4.80520000 | -2.42800000 | -4.03090000 | C 2.86360000  | -3.98050000 | -1.26060000 |
| H -2.41620000 | -2.50700000 | -4.52820000 | C 1.95180000  | -4.97180000 | -1.69170000 |
| H -0.78960000 | -3.06880000 | -2.88450000 | C 0.60820000  | -4.89940000 | -1.30870000 |
| H 4.71610000  | -2.92840000 | -1.66330000 | C 1.03530000  | -2.89150000 | -0.08230000 |

|   |             |             |             |
|---|-------------|-------------|-------------|
| H | 5.65600000  | 0.89500000  | 1.48100000  |
| H | -0.08970000 | -5.66580000 | -1.64320000 |
| P | 0.43350000  | -0.36210000 | -0.00550000 |
| O | 1.88690000  | -0.25270000 | -0.78220000 |
| O | 0.58850000  | -1.83990000 | 0.70650000  |
| O | 0.34440000  | 0.62430000  | 1.13360000  |
| O | -0.62080000 | -0.36740000 | -1.08230000 |
| C | -3.51540000 | 1.68910000  | -0.86620000 |
| N | -2.26490000 | 1.79310000  | -1.39080000 |
| C | -1.58390000 | 2.87680000  | -1.98180000 |
| C | -0.39280000 | 2.55740000  | -2.66340000 |
| C | -1.99970000 | 4.21660000  | -1.91260000 |
| C | 0.33800000  | 3.55500000  | -3.29670000 |
| H | -0.05700000 | 1.52510000  | -2.68480000 |
| C | -1.25360000 | 5.20520000  | -2.55760000 |
| H | -2.89630000 | 4.48940000  | -1.37180000 |
| C | -0.08850000 | 4.88570000  | -3.25410000 |
| H | 1.24130000  | 3.28460000  | -3.83440000 |
| H | -1.58790000 | 6.23790000  | -2.50140000 |
| H | 0.48630000  | 5.66330000  | -3.74890000 |
| C | -1.00410000 | 3.84350000  | 1.22620000  |
| C | -1.89060000 | 4.81590000  | 1.53130000  |
| C | -2.81770000 | 2.44490000  | 1.69370000  |
| N | -1.45480000 | 2.56440000  | 1.41420000  |
| H | -0.80740000 | 1.74750000  | 1.26960000  |
| H | -0.00120000 | 3.97230000  | 0.84890000  |
| H | -1.75450000 | 5.88450000  | 1.45700000  |
| H | -3.36250000 | 2.17990000  | 0.54590000  |
| S | -3.39210000 | 4.12430000  | 2.13470000  |
| C | -3.27330000 | 1.32200000  | 2.59300000  |
| C | -4.59380000 | 1.29490000  | 3.06760000  |
| C | -2.40020000 | 0.28410000  | 2.95060000  |
| C | -5.03160000 | 0.26150000  | 3.89340000  |
| H | -5.28350000 | 2.09560000  | 2.81010000  |
| C | -2.84860000 | -0.75410000 | 3.76870000  |
| H | -1.37260000 | 0.27400000  | 2.60070000  |
| C | -4.15900000 | -0.77130000 | 4.24470000  |
| H | -6.05490000 | 0.26190000  | 4.25830000  |
| H | -2.15670000 | -1.54710000 | 4.03610000  |
| H | -4.50030000 | -1.58230000 | 4.88210000  |
| H | -1.66600000 | 0.94230000  | -1.28830000 |
| C | -4.64670000 | 2.53230000  | -1.38040000 |
| C | -5.70110000 | 2.90470000  | -0.53450000 |
| C | -4.73830000 | 2.84130000  | -2.74800000 |
| C | -6.80860000 | 3.59020000  | -1.03380000 |
| H | -5.65870000 | 2.65290000  | 0.52020000  |
| C | -5.84910000 | 3.51840000  | -3.24670000 |
| H | -3.94260000 | 2.54000000  | -3.42120000 |
| C | -6.88490000 | 3.90180000  | -2.39140000 |
| H | -7.61160000 | 3.87690000  | -0.36060000 |
| H | -5.90690000 | 3.74280000  | -4.30830000 |
| H | -7.74790000 | 4.43340000  | -2.78250000 |
| C | -3.91640000 | 0.25350000  | -0.55530000 |
| H | -3.09060000 | -0.31520000 | -0.12240000 |

|   |             |             |             |
|---|-------------|-------------|-------------|
| H | -4.77310000 | 0.23390000  | 0.11930000  |
| H | -4.21380000 | -0.23060000 | -1.49270000 |
| H | -9.36290000 | -3.04300000 | 1.58360000  |
| H | 1.97490000  | 9.89890000  | -1.16850000 |
| C | 6.48390000  | -1.51380000 | 2.27240000  |
| C | 3.53290000  | 1.88040000  | 0.15540000  |
| C | -1.31840000 | -3.73730000 | -0.20550000 |
| C | 2.37800000  | -6.09850000 | -2.55910000 |
| C | 0.12660000  | -3.84990000 | -0.52560000 |
| C | 3.85690000  | 0.45400000  | 0.40410000  |

(Z)-anti-TS-R

|   |             |             |             |
|---|-------------|-------------|-------------|
| C | -7.74160000 | 1.32000000  | -2.23350000 |
| C | -8.76650000 | 1.98390000  | -1.55370000 |
| C | -8.45660000 | 2.93470000  | -0.57690000 |
| C | -7.12140000 | 3.21810000  | -0.27340000 |
| C | -6.08690000 | 2.54590000  | -0.94440000 |
| C | -6.40580000 | 1.60240000  | -1.93450000 |
| C | -1.65100000 | 4.49640000  | -2.20050000 |
| C | -2.18240000 | 4.88680000  | -3.42650000 |
| C | -3.51350000 | 4.63270000  | -3.74320000 |
| C | -4.35080000 | 3.97380000  | -2.84660000 |
| C | -4.96600000 | 1.68490000  | 1.63750000  |
| C | -4.44470000 | 1.34770000  | 2.88380000  |
| C | -3.13180000 | 1.66200000  | 3.22090000  |
| C | -2.30220000 | 2.32750000  | 2.32310000  |
| C | 3.67000000  | -7.20690000 | 2.52050000  |
| C | 4.49680000  | -8.06100000 | 1.78560000  |
| C | 5.21920000  | -7.56790000 | 0.69540000  |
| C | 5.11170000  | -6.22120000 | 0.33490000  |
| C | 4.27450000  | -5.35930000 | 1.06260000  |
| C | 3.56060000  | -5.86000000 | 2.16330000  |
| C | 5.07460000  | -0.51130000 | 2.03510000  |
| C | 5.67180000  | -0.86220000 | 3.24240000  |
| C | 5.80580000  | -2.19670000 | 3.61330000  |
| C | 5.33470000  | -3.21960000 | 2.79410000  |
| C | 2.92220000  | -4.61470000 | -1.44530000 |
| C | 2.38080000  | -4.26030000 | -2.67860000 |
| C | 2.41160000  | -2.94130000 | -3.12180000 |
| C | 2.95230000  | -1.93210000 | -2.32980000 |
| C | -2.80680000 | 2.73750000  | 0.98420000  |
| C | -4.14440000 | 2.43430000  | 0.64730000  |
| C | -4.67020000 | 2.82960000  | -0.60620000 |
| C | -3.83800000 | 3.50670000  | -1.52860000 |
| C | -2.49240000 | 3.78320000  | -1.20040000 |
| C | 4.55290000  | -1.55790000 | 1.11320000  |
| C | 4.65630000  | -2.91130000 | 1.50440000  |
| C | 4.14880000  | -3.93370000 | 0.66750000  |
| C | 3.54820000  | -3.58820000 | -0.56690000 |
| C | 3.51060000  | -2.24030000 | -0.98620000 |
| H | -7.98200000 | 0.58850000  | -2.99420000 |
| H | -9.25110000 | 3.45100000  | -0.05390000 |
| H | -6.89200000 | 3.95410000  | 0.48740000  |
| H | -5.62150000 | 1.09570000  | -2.48090000 |

|               |             |             |               |             |             |
|---------------|-------------|-------------|---------------|-------------|-------------|
| H -0.61450000 | 4.73060000  | -1.99730000 | C 1.82150000  | 3.25690000  | 0.21930000  |
| H -5.38310000 | 3.82670000  | -3.13260000 | C 2.11310000  | 4.32820000  | 1.09900000  |
| H -5.97810000 | 1.37880000  | 1.41140000  | C 1.04990000  | 5.13190000  | 1.57170000  |
| H -5.06390000 | 0.81650000  | 3.59490000  | C -0.26800000 | 4.83250000  | 1.20860000  |
| H -2.74660000 | 1.37190000  | 4.19000000  | C -0.57180000 | 3.72870000  | 0.41260000  |
| H -1.28340000 | 2.53130000  | 2.62470000  | C 0.47970000  | 2.94530000  | -0.05740000 |
| H 4.13130000  | 3.61630000  | 1.44890000  | H 5.78390000  | 0.12800000  | -1.62640000 |
| H 3.56240000  | 4.77800000  | 2.64900000  | H -1.08270000 | 5.46110000  | 1.56550000  |
| H 4.06270000  | 5.33140000  | 1.05110000  | P 0.37050000  | 0.34040000  | -0.17900000 |
| H 3.11670000  | -7.58730000 | 3.36930000  | O 1.83010000  | 0.49060000  | 0.58250000  |
| H 5.86200000  | -8.22940000 | 0.12920000  | O 0.21050000  | 1.84070000  | -0.85000000 |
| H 5.67520000  | -5.84990000 | -0.51230000 | O 0.46070000  | -0.58820000 | -1.36390000 |
| H 2.93350000  | -5.20450000 | 2.75180000  | O -0.63910000 | 0.07700000  | 0.90210000  |
| H 5.70180000  | 1.22760000  | -4.13830000 | H -9.80050000 | 1.76470000  | -1.78660000 |
| H 6.69600000  | 4.12210000  | -1.09600000 | H 4.58100000  | -9.10360000 | 2.06350000  |
| H 8.53950000  | 4.95910000  | -2.50860000 | C -3.43230000 | -1.83380000 | -0.46390000 |
| H 8.97830000  | 3.93570000  | -4.72340000 | N -2.93530000 | -1.46290000 | 0.76080000  |
| H 7.56200000  | 2.06750000  | -5.52950000 | C -3.20690000 | -0.75940000 | -1.52110000 |
| H 5.00500000  | 0.53980000  | 1.78800000  | H -3.79870000 | 0.12690000  | -1.27200000 |
| H 5.49250000  | -4.23890000 | 3.11750000  | H -2.15850000 | -0.45240000 | -1.54430000 |
| H 2.85060000  | -5.64870000 | -1.13640000 | H -3.48610000 | -1.11510000 | -2.51510000 |
| H 1.92840000  | -5.02110000 | -3.30160000 | C -3.30990000 | -1.78500000 | 2.08450000  |
| H 1.99440000  | -2.69410000 | -4.08940000 | C -2.29000000 | -1.75000000 | 3.05270000  |
| H 2.94310000  | -0.92000000 | -2.71250000 | C -4.63550000 | -2.00880000 | 2.49340000  |
| H 0.01810000  | 5.57140000  | 4.05100000  | C -2.58970000 | -1.96780000 | 4.39410000  |
| H 0.39910000  | 7.52610000  | 5.51190000  | H -1.27780000 | -1.51850000 | 2.73870000  |
| H 1.87610000  | 9.37220000  | 4.76630000  | C -4.91790000 | -2.23700000 | 3.83890000  |
| H 2.96650000  | 9.26770000  | 2.54240000  | H -5.44520000 | -1.96980000 | 1.77680000  |
| H 2.58540000  | 7.32980000  | 1.06100000  | C -3.90190000 | -2.22530000 | 4.79600000  |
| H -1.55390000 | 5.40410000  | -4.14010000 | H -1.79010000 | -1.93080000 | 5.12900000  |
| H -3.90550000 | 4.95940000  | -4.69790000 | H -5.94880000 | -2.40350000 | 4.14040000  |
| H 6.04680000  | -0.08640000 | 3.89770000  | H -4.13320000 | -2.39680000 | 5.84350000  |
| H 6.28990000  | -2.44320000 | 4.54960000  | C -1.14190000 | -2.65590000 | -3.72170000 |
| H 2.74600000  | 4.75660000  | -1.59140000 | C -2.00830000 | -3.61390000 | -4.11490000 |
| H 4.41880000  | 5.08200000  | -1.14470000 | C -1.57550000 | -3.55670000 | -1.60810000 |
| H 4.04020000  | 4.48820000  | -2.76160000 | N -0.81230000 | -2.68820000 | -2.38900000 |
| C 2.11590000  | 7.35510000  | 2.03650000  | H -0.25730000 | -1.90970000 | -1.95690000 |
| C 2.32790000  | 8.45760000  | 2.86990000  | H -0.68520000 | -1.89630000 | -4.34390000 |
| C 1.71150000  | 8.51770000  | 4.12280000  | H -2.39540000 | -3.79910000 | -5.10560000 |
| C 0.87860000  | 7.47700000  | 4.54280000  | H -2.53300000 | -2.80100000 | -1.02880000 |
| C 0.66370000  | 6.37270000  | 3.71260000  | S -2.45680000 | -4.64540000 | -2.76000000 |
| C 3.54220000  | 4.52520000  | 1.58290000  | C -0.95820000 | -4.16180000 | -0.37980000 |
| C 3.76990000  | 4.39620000  | -1.70350000 | C 0.05250000  | -3.47230000 | 0.30640000  |
| C 6.86550000  | 3.67770000  | -2.06880000 | C -1.43070000 | -5.37630000 | 0.14000000  |
| C 7.91550000  | 4.14880000  | -2.86290000 | C 0.55990000  | -3.98250000 | 1.50000000  |
| C 8.16440000  | 3.57050000  | -4.11060000 | H 0.45100000  | -2.54450000 | -0.08790000 |
| C 7.36600000  | 2.51720000  | -4.56470000 | C -0.91350000 | -5.88500000 | 1.32940000  |
| C 6.31470000  | 2.04310000  | -3.77400000 | H -2.19520000 | -5.93760000 | -0.38980000 |
| C 4.95760000  | 0.76410000  | -1.31180000 | C 0.07530000  | -5.18290000 | 2.02050000  |
| C 4.94250000  | 2.11390000  | -1.68030000 | H 1.33490000  | -3.42760000 | 2.02080000  |
| C 3.89620000  | 2.95380000  | -1.23530000 | H -1.28270000 | -6.83140000 | 1.71450000  |
| C 2.89190000  | 2.41120000  | -0.39670000 | H 0.46610000  | -5.57510000 | 2.95500000  |
| C 2.88620000  | 1.02840000  | -0.13980000 | H -2.08410000 | -0.86460000 | 0.72370000  |
| C 3.92760000  | 0.20090000  | -0.55930000 | C -4.68100000 | -2.66220000 | -0.56910000 |



C -4.76180000 -3.92710000 0.04010000  
 C -5.77670000 -2.21390000 -1.32160000  
 C -5.90890000 -4.70610000 -0.08520000  
 H -3.92460000 -4.29290000 0.62540000  
 C -6.93110000 -2.98950000 -1.43650000  
 H -5.73890000 -1.24810000 -1.81050000  
 C -7.00160000 -4.23820000 -0.81990000  
 H -5.95140000 -5.68000000 0.39480000  
 H -7.77300000 -2.61400000 -2.01170000  
 H -7.89810000 -4.84500000 -0.91320000  
 C 3.99180000 -1.22060000 -0.13810000  
 C 6.05060000 2.62720000 -2.52380000  
 C 1.28890000 6.29950000 2.45650000  
 C -1.97700000 3.40830000 0.05980000

(E)-syn-TS-S

C -7.47170000 -4.00520000 -0.80760000  
 C -8.82480000 -3.65510000 -0.83960000  
 C -9.20850000 -2.32470000 -0.64450000  
 C -8.23960000 -1.34170000 -0.42030000  
 C -6.87950000 -1.68720000 -0.39520000  
 C -6.50080000 -3.02540000 -0.58330000  
 C -4.23080000 2.21790000 -2.05450000  
 C -4.92860000 2.16510000 -3.25820000  
 C -5.90470000 1.19760000 -3.47870000  
 C -6.21500000 0.25640000 -2.50030000  
 C -5.52810000 -1.49670000 2.20300000  
 C -4.81440000 -1.45730000 3.39830000  
 C -3.76770000 -0.55740000 3.57840000  
 C -3.41610000 0.34240000 2.57590000  
 C 6.91350000 -4.20320000 1.54030000  
 C 8.28330000 -3.98990000 1.72350000  
 C 8.82270000 -2.71130000 1.54850000  
 C 7.99360000 -1.64410000 1.18870000  
 C 6.61990000 -1.85610000 1.00070000  
 C 6.08260000 -3.13880000 1.18090000  
 C 3.47260000 1.76640000 2.36650000  
 C 3.71490000 1.45300000 3.70140000  
 C 4.58400000 0.42360000 4.04960000  
 C 5.24370000 -0.31690000 3.07280000  
 C 6.39660000 -0.99810000 -1.79580000  
 C 6.23480000 -0.62170000 -3.12670000  
 C 5.25450000 0.29510000 -3.49610000  
 C 4.42840000 0.88450000 -2.54210000  
 C -4.14500000 0.35600000 1.27810000  
 C -5.17440000 -0.58800000 1.07730000  
 C -5.84780000 -0.65070000 -0.16330000  
 C -5.51810000 0.26960000 -1.18490000  
 C -4.51460000 1.23980000 -0.96900000  
 C 4.11970000 0.99040000 1.27090000  
 C 5.02550000 -0.03230000 1.62800000  
 C 5.73160000 -0.73490000 0.62900000  
 C 5.56670000 -0.37940000 -0.72640000  
 C 4.61590000 0.59800000 -1.09230000

H -7.17530000 -5.03560000 -0.95500000  
 H -10.25650000 -2.05540000 -0.66720000  
 H -8.54560000 -0.31360000 -0.27050000  
 H -5.45640000 -3.30720000 -0.55230000  
 H -3.48440000 2.99120000 -1.93200000  
 H -6.96700000 -0.48600000 -2.72970000  
 H -6.33940000 -2.20690000 2.11670000  
 H -5.07610000 -2.13740000 4.19860000  
 H -3.22250000 -0.55390000 4.51350000  
 H -2.58970000 1.01600000 2.76090000  
 H 1.08260000 4.93980000 1.54730000  
 H -0.04200000 5.55760000 2.75680000  
 H 0.06970000 6.33130000 1.17660000  
 H 6.49540000 -5.19200000 1.67790000  
 H 9.88280000 -2.54740000 1.69260000  
 H 8.41790000 -0.65640000 1.05670000  
 H 5.02250000 -3.31010000 1.04450000  
 H 3.91430000 4.53770000 -3.81230000  
 H 2.43570000 7.18290000 -0.73960000  
 H 3.38480000 9.10990000 -1.95540000  
 H 4.60490000 8.76390000 -4.08540000  
 H 4.87300000 6.47700000 -5.00440000  
 H 2.82220000 2.60390000 2.15680000  
 H 5.91670000 -1.10070000 3.39420000  
 H 7.15140000 -1.73690000 -1.56230000  
 H 6.85680000 -1.07360000 -3.88850000  
 H 5.11990000 0.53870000 -4.54220000  
 H 3.65130000 1.55180000 -2.88800000  
 H -3.39590000 4.20010000 4.17780000  
 H -4.17780000 6.01370000 5.66070000  
 H -4.00230000 8.37890000 4.93930000  
 H -3.05290000 8.93090000 2.71690000  
 H -2.28260000 7.13170000 1.21270000  
 H -4.70610000 2.88450000 -4.03580000  
 H -6.42460000 1.17160000 -4.42770000  
 H 3.22840000 2.02590000 4.48050000  
 H 4.75570000 0.20120000 5.09490000  
 H -0.86840000 5.08280000 -1.62640000  
 H 0.11070000 6.40820000 -1.00510000  
 H 0.36970000 5.81910000 -2.64690000  
 C -2.67980000 6.87720000 2.18750000  
 C -3.12220000 7.89840000 3.03380000  
 C -3.65940000 7.58720000 4.28580000  
 C -3.75850000 6.25370000 4.69220000  
 C -3.31690000 5.22920000 3.84920000  
 C 0.08570000 5.36010000 1.68650000  
 C 0.13920000 5.50250000 -1.62330000  
 C 2.95000000 7.01910000 -1.67840000  
 C 3.49380000 8.11200000 -2.35990000  
 C 4.18370000 7.91680000 -3.55960000  
 C 4.33490000 6.62750000 -4.07740000  
 C 3.79230000 5.53160000 -3.39930000  
 C 3.38530000 3.52340000 -1.09260000  
 C 2.52140000 4.55470000 -1.47550000

|   |             |             |             |               |             |             |             |
|---|-------------|-------------|-------------|---------------|-------------|-------------|-------------|
| C | 1.15410000  | 4.47660000  | -1.13850000 | H             | 0.82090000  | -1.97240000 | 1.93150000  |
| C | 0.70060000  | 3.36850000  | -0.38200000 | C             | 3.21970000  | -3.95660000 | 3.29790000  |
| C | 1.55980000  | 2.27600000  | -0.16750000 | H             | 3.20120000  | -6.11540000 | 3.29080000  |
| C | 2.92310000  | 2.35860000  | -0.47510000 | H             | 2.92750000  | -1.82380000 | 3.15540000  |
| C | -0.64330000 | 3.38010000  | 0.26790000  | H             | 4.15990000  | -3.88050000 | 3.83740000  |
| C | -0.98930000 | 4.40400000  | 1.18640000  | H             | -0.10930000 | -2.21970000 | -1.76320000 |
| C | -2.30640000 | 4.44550000  | 1.69400000  | H             | -0.20480000 | -4.24180000 | -0.12670000 |
| C | -3.21320000 | 3.44060000  | 1.34560000  | C             | 1.63110000  | -4.08810000 | -1.59820000 |
| C | -2.84720000 | 2.36640000  | 0.53350000  | C             | 2.45700000  | -5.03790000 | -0.97110000 |
| C | -1.55430000 | 2.34290000  | 0.00980000  | C             | 2.23750000  | -3.07260000 | -2.35390000 |
| H | 4.45050000  | 3.61500000  | -1.30300000 | C             | 3.84150000  | -4.97800000 | -1.09470000 |
| H | -4.23060000 | 3.47680000  | 1.73330000  | H             | 2.01580000  | -5.82810000 | -0.37340000 |
| P | -0.08830000 | 0.18230000  | -0.21750000 | C             | 3.62180000  | -3.03440000 | -2.49900000 |
| O | 1.06570000  | 1.14870000  | 0.46600000  | H             | 1.63810000  | -2.32000000 | -2.84950000 |
| O | -1.14760000 | 1.30430000  | -0.81500000 | C             | 4.43170000  | -3.97910000 | -1.87190000 |
| O | 0.43120000  | -0.57290000 | -1.41320000 | H             | 4.45870000  | -5.71470000 | -0.58830000 |
| O | -0.69510000 | -0.56510000 | 0.94560000  | H             | 4.05440000  | -2.26740000 | -3.12950000 |
| H | -9.57600000 | -4.41470000 | -1.01330000 | H             | 5.51140000  | -3.94170000 | -1.98740000 |
| H | 8.92630000  | -4.81460000 | 2.00240000  |               |             |             |             |
| C | 3.08590000  | 5.72100000  | -2.19960000 |               |             |             |             |
| C | 3.87830000  | 1.28200000  | -0.09500000 | (E)-anti-TS-S |             |             |             |
| C | -2.76500000 | 5.53440000  | 2.59350000  | C             | 6.82280000  | -4.49070000 | 1.60810000  |
| C | -3.82400000 | 1.28350000  | 0.26240000  | C             | 8.18690000  | -4.28740000 | 1.83780000  |
| C | 0.13750000  | -4.24550000 | -1.56460000 | C             | 8.73550000  | -3.00740000 | 1.70880000  |
| N | -0.56750000 | -3.13450000 | -1.95810000 | C             | 7.92140000  | -1.92920000 | 1.34770000  |
| C | -0.35800000 | -5.63040000 | -1.95900000 | C             | 6.55340000  | -2.13100000 | 1.11180000  |
| H | -1.15540000 | -6.00340000 | -1.31010000 | C             | 6.00650000  | -3.41500000 | 1.24810000  |
| H | -0.73070000 | -5.60970000 | -2.98930000 | C             | 3.38110000  | 1.53980000  | 2.42080000  |
| H | 0.46410000  | -6.34500000 | -1.91310000 | C             | 3.52710000  | 1.14440000  | 3.69290000  |
| C | -1.87010000 | -2.97700000 | -2.46730000 | C             | 4.31000000  | 0.03860000  | 4.04740000  |
| C | -2.15670000 | -1.70900000 | -3.01950000 | C             | 4.98310000  | -0.68080000 | 3.13960000  |
| C | -2.87930000 | -3.95700000 | -2.46560000 | C             | 6.50460000  | -1.13920000 | -1.66790000 |
| C | -3.39210000 | -1.45690000 | -3.59830000 | C             | 6.40990000  | -0.73660000 | -2.94250000 |
| H | -1.39730000 | -0.93480000 | -2.97960000 | C             | 5.45540000  | 0.19570000  | -3.36020000 |
| C | -4.11590000 | -3.68510000 | -3.05610000 | C             | 4.56400000  | 0.78330000  | -2.46460000 |
| H | -2.72590000 | -4.92050000 | -2.00520000 | C             | -7.80080000 | -3.55780000 | -1.25180000 |
| C | -4.38110000 | -2.44570000 | -3.63160000 | C             | -9.12940000 | -3.13000000 | -1.17250000 |
| H | -3.57850000 | -0.47890000 | -4.03130000 | C             | -9.41860000 | -1.80020000 | -0.85150000 |
| H | -4.88000000 | -4.45830000 | -3.05150000 | C             | -8.37980000 | -0.89610000 | -0.60940000 |
| H | -5.34530000 | -2.24740000 | -4.09040000 | C             | -7.04460000 | -1.32050000 | -0.68950000 |
| C | -2.70990000 | -3.46090000 | 1.04320000  | C             | -6.75980000 | -2.65670000 | -1.01090000 |
| C | -3.00120000 | -4.77750000 | 1.12440000  | C             | -4.19500000 | 2.54670000  | -2.20440000 |
| C | -0.50790000 | -4.23730000 | 1.15130000  | C             | -4.89140000 | 2.55060000  | -3.34940000 |
| N | -1.38910000 | -3.14160000 | 1.19760000  | C             | -5.92130000 | 1.63450000  | -3.60220000 |
| H | -1.06650000 | -2.14670000 | 1.08410000  | C             | -6.28340000 | 0.70060000  | -2.71170000 |
| H | -3.40650000 | -2.65820000 | 0.85970000  | C             | -5.58160000 | -1.34530000 | 1.87960000  |
| H | -3.96880000 | -5.25120000 | 1.05490000  | C             | -4.86860000 | -1.36380000 | 3.01450000  |
| S | -1.54050000 | -5.71840000 | 1.42360000  | C             | -3.78650000 | -0.50110000 | 3.23240000  |
| C | 0.78650000  | -4.14380000 | 1.90820000  | C             | -3.40600000 | 0.41100000  | 2.32760000  |
| C | 1.47610000  | -5.30050000 | 2.30070000  | C             | 4.65110000  | 0.47400000  | -1.01780000 |
| C | 1.33070000  | -2.88810000 | 2.21610000  | C             | 5.61820000  | -0.57820000 | -0.61480000 |
| C | 2.68480000  | -5.20840000 | 2.98850000  | C             | 5.68560000  | -0.99920000 | 0.72640000  |
| H | 1.06480000  | -6.28340000 | 2.08260000  | C             | 4.91400000  | -0.33640000 | 1.69790000  |
| C | 2.53590000  | -2.80440000 | 2.91110000  | C             | 4.03420000  | 0.79470000  | 1.31310000  |
|   |             |             |             | C             | -4.48720000 | 1.55020000  | -1.14490000 |

|               |             |             |               |             |             |
|---------------|-------------|-------------|---------------|-------------|-------------|
| C -5.59440000 | 0.59620000  | -1.40130000 | C -3.59790000 | 6.26990000  | 4.70970000  |
| C -5.94410000 | -0.36600000 | -0.43320000 | C -3.18370000 | 5.26890000  | 3.82550000  |
| C -5.23510000 | -0.40820000 | 0.78280000  | C -3.10620000 | 3.58950000  | 1.24810000  |
| C -4.11880000 | 0.53540000  | 1.03190000  | C -2.17070000 | 4.54690000  | 1.64960000  |
| H 6.39800000  | -5.48100000 | 1.70900000  | C -0.84870000 | 4.47970000  | 1.15750000  |
| H 9.79130000  | -2.85110000 | 1.88810000  | C -0.52730000 | 3.48270000  | 0.20220000  |
| H 8.35370000  | -0.94110000 | 1.24880000  | C -1.47570000 | 2.50210000  | -0.12840000 |
| H 4.95090000  | -3.57950000 | 1.07480000  | C -2.77060000 | 2.54350000  | 0.38730000  |
| H 2.78480000  | 2.42050000  | 2.22580000  | C 0.83710000  | 3.41670000  | -0.39910000 |
| H 5.58350000  | -1.51360000 | 3.48210000  | C 1.37830000  | 4.51190000  | -1.11360000 |
| H 7.24930000  | -1.88430000 | -1.42110000 | C 2.75760000  | 4.51360000  | -1.40780000 |
| H 7.07500000  | -1.16710000 | -3.68060000 | C 3.54620000  | 3.42740000  | -1.01690000 |
| H 5.39670000  | 0.45600000  | -4.40930000 | C 2.99870000  | 2.28050000  | -0.43530000 |
| H 3.81970000  | 1.46600000  | -2.85120000 | C 1.62310000  | 2.27120000  | -0.17660000 |
| H -0.58960000 | 5.25400000  | -1.63500000 | H -4.12500000 | 3.64080000  | 1.63040000  |
| H 0.71650000  | 5.93220000  | -2.60980000 | H 4.62120000  | 3.46150000  | -1.19120000 |
| H 0.45630000  | 6.50090000  | -0.96090000 | P -0.13750000 | 0.28710000  | -0.39970000 |
| H -7.57760000 | -4.58730000 | -1.49980000 | O -0.89840000 | -0.45350000 | 0.67870000  |
| H 10.44760000 | -1.47040000 | -0.78990000 | O -1.08760000 | 1.49330000  | -1.00290000 |
| H -8.61300000 | 0.13200000  | -0.36070000 | O 1.03020000  | 1.15780000  | 0.40340000  |
| H -5.73540000 | -2.99850000 | -1.07460000 | O 0.43330000  | -0.48480000 | -1.55580000 |
| H -3.30610000 | 4.22960000  | 4.10540000  | C 0.41630000  | -4.24020000 | -1.12350000 |
| H -2.03880000 | 7.24920000  | 1.29400000  | N -0.34510000 | -3.21850000 | -1.64370000 |
| H -2.76190000 | 9.00580000  | 2.87020000  | C -0.17430000 | -5.64250000 | -1.09880000 |
| H -3.76360000 | 8.38930000  | 5.05230000  | H 0.25270000  | -6.21430000 | -0.27070000 |
| H -4.03930000 | 6.00210000  | 5.66090000  | H -1.25640000 | -5.61640000 | -0.96640000 |
| H -3.41340000 | 3.28350000  | -2.07240000 | H 0.06170000  | -6.18800000 | -2.01890000 |
| H -7.08190000 | 0.01890000  | -2.97380000 | C 1.66410000  | -2.10620000 | 2.27470000  |
| H -6.40950000 | -2.03470000 | 1.77820000  | C 2.42830000  | -3.14550000 | 2.67440000  |
| H -5.13550000 | -2.07030000 | 3.79050000  | C 0.20780000  | -3.81240000 | 1.61470000  |
| H -3.24440000 | -0.57150000 | 4.16710000  | N 0.41940000  | -2.44830000 | 1.81290000  |
| H -2.56090000 | 1.04710000  | 2.55780000  | H -0.19820000 | -1.69880000 | 1.39780000  |
| H 4.21270000  | 4.44020000  | -3.70540000 | H 1.92090000  | -1.05530000 | 2.29370000  |
| H 5.32490000  | 6.33110000  | -4.84030000 | H 3.42490000  | -3.12970000 | 3.08710000  |
| H 5.17390000  | 8.61770000  | -3.89460000 | H 0.40040000  | -4.03180000 | 0.32750000  |
| H 3.91590000  | 9.01140000  | -1.79520000 | S 1.57180000  | -4.66620000 | 2.45780000  |
| H 2.81310000  | 7.13190000  | -0.63600000 | C -1.18790000 | -4.35640000 | 1.77630000  |
| H 3.02870000  | 1.70160000  | 4.47640000  | C -2.27230000 | -3.62400000 | 1.26710000  |
| H 4.38340000  | -0.23390000 | 5.09280000  | C -1.41990000 | -5.61950000 | 2.33780000  |
| H -4.65120000 | 3.28560000  | -4.10740000 | C -3.55460000 | -4.16900000 | 1.30070000  |
| H -6.44170000 | 1.68550000  | -4.55040000 | H -2.12210000 | -2.63360000 | 0.84810000  |
| H 0.29090000  | 6.35700000  | 1.21840000  | C -2.70880000 | -6.14920000 | 2.38490000  |
| H 0.10700000  | 5.55740000  | 2.77890000  | H -0.59610000 | -6.18850000 | 2.75900000  |
| H 1.23390000  | 4.91610000  | 1.58440000  | C -3.78020000 | -5.42900000 | 1.85650000  |
| C 3.34300000  | 6.94870000  | -1.56240000 | H -4.38030000 | -3.60850000 | 0.87820000  |
| C 3.97380000  | 8.01420000  | -2.21170000 | H -2.87150000 | -7.12500000 | 2.83420000  |
| C 4.68500000  | 7.79190000  | -3.39410000 | H -4.78420000 | -5.84330000 | 1.88040000  |
| C 4.77030000  | 6.50280000  | -3.92690000 | H 0.01870000  | -2.25040000 | -1.55370000 |
| C 4.14050000  | 5.43440000  | -3.28110000 | C 1.89450000  | -4.15550000 | -1.35700000 |
| C 0.44190000  | 5.60900000  | -1.59930000 | C 2.75570000  | -5.16530000 | -0.88360000 |
| C 0.25240000  | 5.37600000  | 1.70810000  | C 2.44280000  | -3.12010000 | -2.13570000 |
| C -2.46050000 | 6.96560000  | 2.25040000  | C 4.11450000  | -5.14770000 | -1.19090000 |
| C -2.87560000 | 7.96320000  | 3.13760000  | H 2.36750000  | -5.98090000 | -0.28520000 |
| C -3.44210000 | 7.61580000  | 4.36700000  | C 3.79600000  | -3.12340000 | -2.45660000 |

H 1.81720000 -2.31900000 -2.51040000  
 C 4.64080000 -4.12990000 -1.98660000  
 H 4.75910000 -5.93770000 -0.81540000  
 H 4.17760000 -2.34150000 -3.10260000  
 H 5.69650000 -4.12530000 -2.24360000  
 C -1.58330000 -3.28780000 -2.32530000  
 C -2.49490000 -2.22910000 -2.17090000  
 C -1.87700000 -4.31070000 -3.24350000  
 C -3.67010000 -2.21180000 -2.91640000  
 H -2.27450000 -1.42730000 -1.47490000  
 C -3.07420000 -4.29730000 -3.95630000  
 H -1.15450000 -5.09420000 -3.43570000  
 C -3.97930000 -3.24810000 -3.79850000  
 H -4.35270000 -1.37810000 -2.80910000  
 H -3.28220000 -5.09960000 -4.65930000  
 H -4.90520000 -3.22780000 -4.36600000  
 H -9.93460000 -3.82860000 -1.35940000  
 H 8.81840000 -5.12090000 2.11650000  
 C 3.88180000 1.14860000 -0.04520000  
 C 3.41270000 5.65190000 -2.09900000  
 C -2.60280000 5.60990000 2.59220000  
 C -3.77900000 1.50590000 0.07020000

On MOF-fcu  
 (Z)-syn-TS-R

H 2.02660000 -5.78820000 10.30450000  
 H -1.12040000 -9.93710000 5.76500000  
 H -8.92780000 -0.34310000 7.58780000  
 H -6.24690000 -9.84280000 -0.42450000  
 H -10.62070000 -5.03870000 2.49170000  
 H -3.35010000 1.29180000 11.30010000  
 H 7.63400000 0.48070000 9.18260000  
 H 8.93900000 0.35570000 7.11580000  
 H 4.98070000 -10.64500000 0.26660000  
 H 9.60030000 -6.24820000 -2.77900000  
 H 1.35780000 -0.88490000 -7.86290000  
 H -1.17160000 -0.63190000 8.10670000  
 H 1.24370000 -7.84670000 2.82700000  
 H -1.68370000 -7.50970000 -2.56450000  
 H 7.45060000 -3.29780000 -0.47470000  
 H -7.63250000 -2.29600000 0.99910000  
 O -3.14020000 -0.69130000 6.41060000  
 O 2.02360000 -5.92360000 4.39290000  
 O -2.03600000 -5.60070000 -4.16840000  
 H 5.66480000 -4.91690000 -0.06940000  
 H -6.12570000 -4.17060000 0.58680000  
 H -3.37530000 -7.65470000 1.93190000  
 H 2.13090000 -7.73480000 -1.16810000  
 H 8.07590000 0.18180000 1.43660000  
 H -8.04010000 -0.41710000 -1.19830000  
 H 0.78990000 -2.62730000 7.63040000  
 H -0.70810000 -2.86660000 -7.51390000  
 H -5.00260000 -5.84630000 2.23310000  
 H 3.95070000 -6.15340000 -1.56800000

H -6.69990000 -0.57090000 -3.23390000  
 O 0.19650000 -4.16440000 5.62670000  
 O -0.27970000 -4.53890000 -5.65310000  
 C 2.51240000 -13.29340000 2.93890000  
 C -0.67290000 -16.17470000 3.36620000  
 C 2.01130000 -16.41140000 -0.00810000  
 O 0.43770000 -14.46880000 1.36880000  
 H -2.81930000 -5.64080000 -10.10320000  
 H -0.82150000 -10.49390000 -5.59950000  
 H -7.46500000 -0.64860000 -8.96340000  
 C -4.22750000 -13.09920000 -2.44540000  
 C -1.36070000 -16.30980000 -2.69900000  
 C -4.04450000 -16.07570000 0.67720000  
 O -1.24400000 -16.73900000 -1.43330000  
 O -0.83740000 -16.65970000 2.12620000  
 O 0.73610000 -16.79870000 0.14580000  
 O -2.81750000 -16.60210000 0.54740000  
 O -2.28240000 -14.38830000 -0.80470000  
 Zr -0.97910000 -15.51600000 0.31310000  
 H 11.28890000 -1.62810000 3.68460000  
 H 9.90920000 -1.57530000 5.69650000  
 H 3.25210000 5.61390000 10.23760000  
 H 3.09100000 7.33130000 8.51230000  
 H 0.83330000 10.29970000 5.73200000  
 H 1.09010000 8.51890000 7.39540000  
 C 6.17130000 -0.40820000 15.59340000  
 C 2.87100000 -3.12890000 16.16450000  
 C 5.31030000 -3.40690000 12.60660000  
 O 3.93820000 -1.42460000 14.13990000  
 H -4.13500000 1.00180000 -6.76690000  
 H 4.34370000 -1.50840000 7.22430000  
 H -0.63370000 7.54190000 -2.34210000  
 H 2.68330000 7.78970000 2.75550000  
 H -6.96480000 3.29410000 2.40080000  
 H 7.60110000 2.42270000 -2.22710000  
 H -5.52460000 1.13760000 -4.76080000  
 H 3.60700000 7.44520000 0.36850000  
 H -2.35170000 7.80970000 -0.20040000  
 H 7.04970000 0.54270000 -4.14430000  
 H -6.80280000 1.50310000 4.31770000  
 H 1.35830000 2.77830000 7.58480000  
 H -3.41220000 3.63930000 -7.65590000  
 O -4.48860000 1.61060000 5.49590000  
 H -4.39670000 10.64840000 2.32660000  
 O -6.44830000 9.13850000 2.85120000  
 H -9.84920000 6.28890000 1.24300000  
 O -8.13560000 8.19020000 0.81030000  
 C 1.65290000 -5.44330000 9.34870000  
 C 1.37880000 -6.38770000 8.35570000  
 C -3.54290000 -12.94960000 3.61510000  
 C -9.26910000 0.62770000 5.05680000  
 C -0.89760000 0.25900000 10.66730000  
 C 1.76150000 -3.06170000 10.14520000  
 C -0.26220000 -10.07530000 3.18060000

|    |              |              |             |    |              |              |              |
|----|--------------|--------------|-------------|----|--------------|--------------|--------------|
| C  | -12.51730000 | -2.20050000  | 5.66720000  | O  | 1.51460000   | 0.08600000   | 16.91070000  |
| C  | -0.66170000  | -2.78110000  | 13.70430000 | O  | 5.01930000   | -0.28230000  | 16.26910000  |
| C  | -10.17170000 | -2.38480000  | 2.03310000  | O  | 3.08240000   | -1.87920000  | 16.60410000  |
| C  | -3.71930000  | -9.97760000  | 0.56920000  | O  | 3.45120000   | 1.68390000   | 16.57530000  |
| C  | -8.02060000  | 0.57190000   | 5.84700000  | O  | 1.78190000   | 1.27830000   | 14.56180000  |
| C  | -2.10180000  | 0.33310000   | 9.80990000  | Zr | 3.05470000   | -0.08520000  | 15.42260000  |
| C  | 1.45620000   | -4.07360000  | 9.10430000  | C  | -8.01750000  | 0.04360000   | 7.14650000   |
| C  | 0.00940000   | -9.01180000  | 4.16770000  | C  | -6.83430000  | -0.00470000  | 7.88670000   |
| C  | -9.25150000  | -3.51790000  | 1.77350000  | C  | -15.23900000 | 1.08940000   | 6.31820000   |
| C  | -4.68990000  | -8.88020000  | 0.72760000  | C  | -11.99640000 | 3.87950000   | 5.70290000   |
| C  | -5.63010000  | 0.47790000   | 7.34630000  | C  | -15.60860000 | 4.20130000   | 3.35420000   |
| C  | -4.39770000  | 0.45550000   | 8.17000000  | C  | -3.29440000  | 0.89300000   | 10.29480000  |
| C  | 0.91090000   | -5.98510000  | 7.09380000  | C  | -4.42940000  | 0.95250000   | 9.48350000   |
| C  | 0.58830000   | -7.00360000  | 6.06460000  | O  | -13.91570000 | 0.97480000   | 6.50640000   |
| C  | -7.51270000  | -5.68550000  | 1.27080000  | O  | -10.41750000 | 0.67770000   | 5.75510000   |
| C  | -6.55720000  | -6.79990000  | 1.08090000  | O  | -0.97920000  | -1.47960000  | 13.77860000  |
| C  | -0.49820000  | -9.10040000  | 5.47170000  | O  | -0.61010000  | 2.08210000   | 13.75110000  |
| C  | -0.21650000  | -8.10340000  | 6.40820000  | O  | -1.10400000  | 0.32290000   | 11.99470000  |
| O  | -2.24080000  | -13.01930000 | 3.93070000  | O  | -0.47510000  | 0.28330000   | 15.52890000  |
| O  | 1.31320000   | -13.21050000 | 3.53470000  | O  | -12.31980000 | -0.95510000  | 6.12480000   |
| O  | 1.96370000   | -3.52150000  | 11.39320000 | O  | -12.01410000 | 2.61300000   | 6.14550000   |
| O  | 2.59860000   | -3.57150000  | 14.92790000 | O  | 1.52810000   | -1.17170000  | 14.58110000  |
| O  | 4.03080000   | -3.73380000  | 12.84370000 | O  | -13.73590000 | 2.20930000   | 4.16960000   |
| O  | 0.52500000   | -3.36650000  | 13.48270000 | Zr | 0.36740000   | 0.17940000   | 13.55620000  |
| O  | -0.55760000  | -14.90570000 | 3.78550000  | Zr | -12.41410000 | 0.85680000   | 4.97510000   |
| O  | -0.38590000  | -11.32120000 | 3.67090000  | O  | -16.46500000 | -0.58450000  | 3.41390000   |
| O  | -1.87680000  | -11.87600000 | 1.57570000  | O  | -16.16200000 | 2.98220000   | 3.43700000   |
| O  | 1.08540000   | -1.14780000  | 12.16490000 | O  | -16.67610000 | 1.23940000   | 1.66890000   |
| O  | -11.54130000 | -0.44720000  | 3.65040000  | O  | -15.94380000 | 1.15700000   | 5.17860000   |
| Zr | 2.40070000   | -2.37070000  | 13.15840000 | O  | -13.94510000 | -0.24160000  | 4.15560000   |
| Zr | -0.59670000  | -13.14660000 | 2.55380000  | Zr | -15.15530000 | 1.10200000   | 3.18080000   |
| H  | -11.11530000 | 1.68770000   | -3.37730000 | H  | 9.09920000   | -1.48910000  | -7.35250000  |
| C  | -5.97140000  | -8.97490000  | 0.16280000  | O  | 7.10050000   | -1.50440000  | -9.01030000  |
| C  | -6.90800000  | -7.95030000  | 0.34310000  | H  | 6.11100000   | 10.06000000  | -1.98300000  |
| C  | -16.48700000 | 1.23040000   | 0.34060000  | O  | 7.96400000   | 8.30430000   | -2.48260000  |
| C  | -13.76670000 | -2.05340000  | -0.30330000 | H  | 10.86640000  | 4.90680000   | -0.88720000  |
| C  | -16.12480000 | -1.87820000  | 3.31440000  | O  | 9.44450000   | 7.03790000   | -0.44600000  |
| C  | -9.64950000  | -4.83680000  | 2.05710000  | C  | 16.59930000  | -1.25380000  | -0.00430000  |
| C  | -8.80210000  | -5.91690000  | 1.79320000  | C  | 13.34990000  | -4.05340000  | 0.50980000   |
| O  | -13.55950000 | -2.53710000  | 0.93080000  | C  | 15.75730000  | -4.18140000  | -3.06560000  |
| O  | -12.81480000 | -2.62520000  | 4.43000000  | O  | 14.36990000  | -2.26900000  | -1.46960000  |
| O  | -4.43220000  | -14.79170000 | 0.69270000  | H  | 3.59290000   | 0.83890000   | -11.13010000 |
| O  | -4.23700000  | -11.21690000 | 0.54530000  | O  | 5.89200000   | 0.86790000   | -9.91910000  |
| O  | -11.44710000 | -2.71510000  | 2.29570000  | H  | 0.29290000   | 4.76660000   | -9.53330000  |
| O  | -14.93350000 | -2.43640000  | 3.05370000  | H  | 0.68010000   | 6.44010000   | -7.78480000  |
| O  | -4.53920000  | -13.05490000 | -1.14150000 | H  | -0.02480000  | 10.35590000  | -5.56440000  |
| O  | -4.13790000  | -12.94800000 | 2.41270000  | H  | -0.55770000  | 8.61400000   | -7.18330000  |
| O  | -2.00510000  | -14.33330000 | 1.64310000  | C  | 4.74520000   | -9.67190000  | -0.14700000  |
| O  | -14.44810000 | -0.18260000  | 1.74280000  | C  | 5.79170000   | -8.77690000  | -0.38940000  |
| Zr | -13.09010000 | -1.39630000  | 2.68980000  | C  | 1.82740000   | -13.42500000 | -3.12190000  |
| Zr | -3.15920000  | -13.07210000 | 0.50480000  | C  | 1.09500000   | 0.01220000   | -10.43580000 |
| C  | 0.19890000   | 0.22160000   | 16.68700000 | C  | 9.45650000   | -0.56630000  | -4.82110000  |
| C  | 3.49750000   | 2.94330000   | 16.11540000 | C  | 12.20210000  | -3.81960000  | -5.47560000  |
| C  | -0.03260000  | 3.28910000   | 13.65360000 | C  | 2.32450000   | -10.30500000 | -0.23680000  |

|    |             |              |              |    |             |             |             |
|----|-------------|--------------|--------------|----|-------------|-------------|-------------|
| C  | 9.77740000  | -3.69000000  | -1.86360000  | C  | 1.51940000  | 10.21030000 | 3.09390000  |
| C  | 0.41290000  | -2.95760000  | -13.52990000 | C  | 2.40960000  | 3.00910000  | 10.09610000 |
| C  | 2.32140000  | -0.03310000  | -9.60980000  | C  | 5.93880000  | 2.66290000  | 12.57100000 |
| C  | 8.23520000  | -0.47080000  | -5.64940000  | C  | 3.77310000  | 10.00430000 | -0.58160000 |
| C  | -1.79780000 | -4.08920000  | -8.96540000  | C  | 10.29790000 | 2.39700000  | -1.78210000 |
| C  | -1.22250000 | -9.16500000  | -3.91930000  | C  | 9.78700000  | -0.73610000 | 2.39830000  |
| C  | 3.41550000  | -9.32270000  | -0.43620000  | C  | 5.88340000  | -0.48740000 | 8.35310000  |
| C  | 8.67350000  | -4.65290000  | -1.64600000  | C  | 1.71910000  | 9.16640000  | 4.11480000  |
| C  | 4.68370000  | -0.18390000  | -8.06960000  | C  | 2.32590000  | 4.05450000  | 9.04650000  |
| C  | 5.91730000  | -0.27460000  | -7.25080000  | C  | 4.74060000  | 8.89970000  | -0.77280000 |
| C  | -1.53590000 | -6.11650000  | -6.98080000  | C  | 9.35750000  | 3.52430000  | -1.59260000 |
| C  | -1.42150000 | -7.15330000  | -5.93050000  | C  | 8.18930000  | -0.68970000 | 4.72700000  |
| C  | 5.51760000  | -7.49390000  | -0.90970000  | C  | 7.38700000  | -0.62890000 | 5.97130000  |
| C  | 6.61190000  | -6.52510000  | -1.16600000  | C  | 2.02100000  | 7.11860000  | 6.03050000  |
| C  | 8.75250000  | -5.95240000  | -2.17300000  | C  | 2.15510000  | 6.04520000  | 7.04550000  |
| C  | 7.74270000  | -6.88900000  | -1.93010000  | C  | 6.61440000  | 6.80940000  | -1.09350000 |
| O  | 12.39450000 | -4.32260000  | -4.24700000  | C  | 7.57290000  | 5.69170000  | -1.27580000 |
| O  | 13.06400000 | -4.45970000  | -0.73620000  | C  | 7.19360000  | 0.01260000  | 8.31080000  |
| O  | 2.70040000  | -11.59450000 | -0.17610000  | C  | 7.93720000  | -0.05590000 | 7.13020000  |
| O  | 2.53120000  | -15.17790000 | -0.09420000  | O  | 11.94240000 | -0.92190000 | 1.36200000  |
| O  | 14.48430000 | -4.53570000  | -2.83430000  | O  | 15.45240000 | -1.16920000 | 0.68630000  |
| O  | 10.97430000 | -4.22770000  | -2.15720000  | O  | 6.25750000  | 1.36170000  | 12.50110000 |
| O  | 2.82340000  | -13.35300000 | 1.63520000   | O  | 5.88680000  | -2.19920000 | 12.51180000 |
| O  | 2.42360000  | -13.42330000 | -1.92020000  | O  | 6.39370000  | -0.44180000 | 14.27100000 |
| O  | 0.29040000  | -12.06660000 | -1.14990000  | O  | 5.74280000  | -0.37410000 | 10.74350000 |
| O  | 11.49350000 | -1.97870000  | -3.41330000  | O  | 13.55510000 | -2.81600000 | 0.98530000  |
| O  | -1.07950000 | -1.14300000  | -11.93290000 | O  | 13.83960000 | 0.75120000  | 1.07270000  |
| Zr | 12.83780000 | -3.20680000  | -2.46590000  | O  | 3.75290000  | 1.05290000  | 11.69830000 |
| Zr | 1.44360000  | -13.32800000 | -0.01140000  | O  | 12.17320000 | 0.38390000  | -0.93870000 |
| C  | -2.29630000 | -5.38460000  | -9.18490000  | O  | 2.38180000  | 11.95270000 | 0.99380000  |
| C  | -2.17050000 | -6.36920000  | -8.20720000  | Zr | 4.91110000  | -0.29710000 | 12.72390000 |
| C  | -6.06730000 | 0.35890000   | -15.25700000 | Zr | 13.47730000 | -0.98620000 | -0.13740000 |
| C  | -3.16940000 | -2.76690000  | -15.95070000 | C  | -5.16280000 | 0.66400000  | -6.81960000 |
| C  | -5.57730000 | -2.80360000  | -12.36570000 | C  | 5.34260000  | -1.08840000 | 7.20500000  |
| C  | -1.05040000 | -9.48100000  | -5.27720000  | C  | 2.28560000  | -0.53200000 | -8.29650000 |
| C  | -1.14120000 | -8.49020000  | -6.25180000  | C  | -2.07030000 | -0.16980000 | 8.49710000  |
| O  | 0.52430000  | -13.36910000 | -3.43610000  | C  | -0.61710000 | 7.78810000  | -3.39670000 |
| O  | -3.02770000 | -13.17110000 | -3.04100000  | C  | 0.81180000  | -7.91370000 | 3.81870000  |
| O  | -2.94070000 | -3.27160000  | -14.72910000 | C  | 2.32170000  | 7.94960000  | 3.76410000  |
| O  | -2.26730000 | -3.40450000  | -11.21700000 | C  | -1.50610000 | -7.83440000 | -3.58600000 |
| O  | -0.84060000 | -3.38300000  | -13.31150000 | C  | -7.21320000 | 4.29920000  | 2.08380000  |
| O  | -4.35620000 | -3.29250000  | -12.62960000 | C  | 7.54080000  | -4.29120000 | -0.89690000 |
| O  | -1.15140000 | -11.47910000 | -3.27680000  | C  | -7.97190000 | -3.29700000 | 1.23500000  |
| O  | -1.34490000 | -15.06120000 | -3.18920000  | C  | 7.98960000  | 3.36900000  | -1.87150000 |
| O  | 0.15990000  | -14.52360000 | -1.07900000  | C  | -5.95810000 | 0.74680000  | -5.67380000 |
| O  | -3.97030000 | -0.98710000  | -13.86960000 | C  | 6.07950000  | -1.15540000 | 6.01870000  |
| Zr | -2.56100000 | -2.15260000  | -12.93550000 | C  | 3.45490000  | -0.60640000 | -7.53530000 |
| Zr | -1.11970000 | -13.24920000 | -2.05830000  | C  | -3.19940000 | -0.10090000 | 7.67410000  |
| C  | 10.28780000 | -1.22070000  | 3.61820000   | C  | -0.96230000 | 6.79500000  | -4.32240000 |
| C  | 9.49830000  | -1.19480000  | 4.76920000   | C  | 1.10210000  | -6.91090000 | 4.75090000  |
| C  | 10.62050000 | -0.76690000  | 1.17440000   | C  | 2.47300000  | 6.92920000  | 4.70730000  |
| C  | 5.07090000  | -0.36850000  | 9.57920000   | C  | -1.61270000 | -6.85260000 | -4.56880000 |
| C  | 4.63360000  | 13.07340000  | 2.31220000   | C  | -6.18280000 | 5.22920000  | 1.92210000  |
| C  | 13.86820000 | 2.02440000   | 0.65110000   | C  | 6.52090000  | -5.21730000 | -0.66140000 |

|   |              |             |              |    |              |              |              |
|---|--------------|-------------|--------------|----|--------------|--------------|--------------|
| C | -7.11080000  | -4.36890000 | 0.99230000   | O  | -0.98220000  | -9.74150000  | -1.60680000  |
| C | 7.10810000   | 4.44090000  | -1.71450000  | O  | -9.32530000  | 2.40720000   | 1.99500000   |
| C | -4.88030000  | 0.14370000  | -9.25560000  | O  | 9.46390000   | -2.39020000  | -1.73170000  |
| C | -10.51000000 | 0.71870000  | -0.90620000  | O  | -9.63340000  | -1.15490000  | 1.97220000   |
| C | -2.71210000  | 13.37280000 | -2.19880000  | O  | 9.75740000   | 1.16750000   | -1.75060000  |
| C | 0.05850000   | 10.14400000 | -2.83930000  | O  | -2.42920000  | -9.61170000  | 0.48780000   |
| C | -1.80770000  | 3.09080000  | -9.75780000  | O  | 1.08140000   | -9.80190000  | -0.15550000  |
| C | -13.26150000 | 4.02490000  | -0.26410000  | O  | 2.51780000   | 9.64040000   | -0.27140000  |
| C | -9.65090000  | 3.70830000  | 2.07410000   | O  | -0.95260000  | 9.83390000   | 0.51850000   |
| C | -2.16110000  | 10.34130000 | 0.81090000   | O  | 9.27020000   | -0.55300000  | -3.49090000  |
| C | -5.37170000  | 3.28960000  | -12.14840000 | O  | 9.95980000   | -0.63970000  | 0.01170000   |
| C | -5.69980000  | 0.18120000  | -8.02560000  | O  | -9.10900000  | 0.62980000   | 3.72430000   |
| C | -9.69140000  | 0.63330000  | -2.13550000  | O  | -9.83210000  | 0.63740000   | 0.24890000   |
| C | -0.28180000  | 9.08730000  | -3.82290000  | O  | 2.19250000   | 1.74810000   | 9.68660000   |
| C | -1.57840000  | 4.08010000  | -8.70400000  | O  | 1.80600000   | -1.78970000  | 9.71900000   |
| C | -8.54930000  | 4.67250000  | 1.86360000   | O  | -1.84140000  | -1.75680000  | -9.50210000  |
| C | -3.24170000  | 9.35740000  | 1.02960000   | O  | -1.82360000  | 1.81220000   | -9.35460000  |
| C | -7.30630000  | 0.35170000  | -5.71060000  | O  | 11.96210000  | -2.07100000  | -0.99740000  |
| C | -8.14030000  | 0.44810000  | -4.48810000  | O  | 3.49910000   | -1.40070000  | 11.72160000  |
| C | -0.91980000  | 7.07770000  | -5.70320000  | O  | 0.56960000   | -12.01450000 | 1.29930000   |
| C | -1.15180000  | 6.01510000  | -6.70870000  | O  | -11.83890000 | 2.07060000   | 1.25050000   |
| C | -6.46610000  | 6.55040000  | 1.53750000   | O  | -3.41630000  | 1.38130000   | -11.37990000 |
| C | -5.36040000  | 7.52370000  | 1.36820000   | O  | -0.58380000  | 12.06850000  | -0.82790000  |
| C | -4.34890000  | -7.73810000 | 1.46590000   | Zr | 0.84410000   | 10.92860000  | 0.10410000   |
| C | 3.14480000   | -8.03680000 | -0.93550000  | Zr | -0.73490000  | -10.89280000 | 0.18380000   |
| C | 4.50310000   | 7.63480000  | -0.20890000  | Zr | -10.63810000 | 0.72490000   | 2.22920000   |
| C | -3.19090000  | 8.09080000  | 0.42400000   | Zr | 10.77550000  | -0.70820000  | -1.97000000  |
| C | 7.07090000   | 0.13240000  | -5.14640000  | Zr | -2.04210000  | 0.07760000   | -10.59440000 |
| C | 8.47950000   | -0.22200000 | 2.35720000   | Zr | 2.22480000   | -0.03760000  | 10.87340000  |
| C | -6.81880000  | 1.06120000  | 5.30660000   | C  | -10.16080000 | 1.17660000   | -3.34130000  |
| C | -8.43010000  | 0.01290000  | -2.11280000  | C  | -9.40350000  | 1.08120000   | -4.51350000  |
| C | 1.75710000   | 3.76360000  | 7.79360000   | C  | -7.03690000  | -0.24430000  | -8.05410000  |
| C | 0.97070000   | -3.67320000 | 7.84600000   | C  | -7.84130000  | -0.15500000  | -6.91450000  |
| C | -1.14380000  | -3.83210000 | -7.75500000  | O  | -11.83620000 | 0.86380000   | -1.08170000  |
| C | -2.51070000  | 4.24070000  | -7.67080000  | O  | -15.35070000 | 1.13870000   | -0.36660000  |
| C | -5.27510000  | -6.70960000 | 1.64130000   | O  | -5.98460000  | -1.53240000  | -12.23320000 |
| C | 4.18500000   | -7.13240000 | -1.16780000  | O  | -5.86470000  | 2.04210000   | -12.11520000 |
| C | 5.43010000   | 6.60210000  | -0.36750000  | O  | -6.27260000  | 0.32270000   | -13.93190000 |
| C | -4.24010000  | 7.18360000  | 0.59200000   | O  | -5.55860000  | 0.18440000   | -10.41610000 |
| C | 5.92450000   | 0.22940000  | -5.93940000  | O  | -13.45490000 | 2.77900000   | -0.72200000  |
| C | 7.67580000   | -0.20920000 | 3.50190000   | O  | -13.74500000 | -0.78720000  | -0.74620000  |
| C | -5.62730000  | 1.00950000  | 6.03810000   | O  | -3.49890000  | -1.08380000  | -11.45270000 |
| C | -7.66350000  | -0.07770000 | -3.27650000  | O  | -12.04980000 | -0.38470000  | 1.23790000   |
| C | 1.68370000   | 4.73780000  | 6.79210000   | O  | -2.15510000  | -11.92980000 | -0.87310000  |
| C | 0.71530000   | -4.61180000 | 6.84170000   | Zr | -4.76030000  | 0.22330000   | -12.41030000 |
| C | -1.00880000  | -4.82890000 | -6.79400000  | Zr | -13.36350000 | 0.96880000   | 0.43030000   |
| C | -2.30970000  | 5.20450000  | -6.67420000  | C  | 2.80510000   | 5.35390000   | 9.28630000   |
| O | -3.55160000  | 0.08790000  | -9.07430000  | C  | 2.71650000   | 6.33760000   | 8.29860000   |
| O | 3.74690000   | -0.26290000 | 9.38440000   | C  | -1.29100000  | 13.43930000  | 3.73150000   |
| O | -0.06740000  | 0.00790000  | -9.76400000  | C  | 1.83940000   | 16.30900000  | 2.95480000   |
| O | 0.26950000   | 0.12770000  | 10.01740000  | C  | -1.84280000  | 16.45040000  | 0.69820000   |
| O | 0.34780000   | 9.72170000  | -1.59750000  | C  | 1.29970000   | 9.36740000   | 5.43810000   |
| O | -0.33080000  | -9.67540000 | 1.90070000   | C  | 1.44490000   | 8.35050000   | 6.38590000   |
| O | 1.23560000   | 9.76280000  | 1.85980000   | O  | 0.04050000   | 13.38060000  | 3.88350000   |

|    |              |             |              |    |             |              |              |
|----|--------------|-------------|--------------|----|-------------|--------------|--------------|
| O  | 3.51580000   | 13.14590000 | 3.05070000   | O  | -1.47500000 | 1.41120000   | -14.26870000 |
| O  | 3.31830000   | 3.41210000  | 14.87150000  | Zr | -0.21030000 | 0.10850000   | -13.30910000 |
| O  | 2.69150000   | 3.43560000  | 11.33970000  | Zr | 12.59880000 | -0.81000000  | -4.68910000  |
| O  | 1.24820000   | 3.61420000  | 13.42230000  | O  | -1.40360000 | 0.25210000   | -16.64530000 |
| O  | 4.75160000   | 3.24720000  | 12.79140000  | O  | -4.91910000 | 0.34370000   | -15.95070000 |
| O  | 1.64210000   | 11.48090000 | 3.51260000   | O  | -3.10590000 | 2.08750000   | -16.24140000 |
| O  | 1.88140000   | 15.05410000 | 3.42690000   | O  | -3.21870000 | -1.48990000  | -16.35840000 |
| O  | 4.19150000   | 1.02540000  | 14.12100000  | O  | -1.55490000 | -1.04870000  | -14.34540000 |
| O  | 0.11810000   | 14.54730000 | 1.51370000   | Zr | -2.93300000 | 0.25330000   | -15.13640000 |
| Zr | 2.87870000   | 2.24840000  | 13.12070000  | C  | 5.91640000  | 9.10300000   | -1.51400000  |
| Zr | 1.50110000   | 13.25720000 | 2.31330000   | C  | 6.85390000  | 8.07580000   | -1.66880000  |
| C  | -4.34810000  | 9.68830000  | 1.82720000   | C  | 3.21110000  | 13.03260000  | -3.62170000  |
| C  | -5.40540000  | 8.78890000  | 1.99290000   | C  | 0.41020000  | 16.25250000  | -2.97930000  |
| C  | -8.83040000  | 5.98510000  | 1.45140000   | C  | 4.08520000  | 16.11040000  | -0.71900000  |
| C  | -7.80670000  | 6.92410000  | 1.29800000   | C  | 9.82150000  | 4.76960000   | -1.13770000  |
| O  | -12.21660000 | 4.36400000  | 4.47130000   | C  | 8.94660000  | 5.85160000   | -0.98850000  |
| O  | -12.97160000 | 4.45080000  | 0.97440000   | O  | 13.68000000 | 2.52810000   | -0.57790000  |
| O  | -2.51650000  | 11.63360000 | 0.91600000   | O  | 12.99050000 | 2.66590000   | -4.08870000  |
| O  | -2.35240000  | 15.21690000 | 0.83290000   | O  | 4.46340000  | 14.82590000  | -0.79790000  |
| O  | -14.34010000 | 4.55440000  | 3.09860000   | O  | 4.26160000  | 11.24780000  | -0.73060000  |
| O  | -10.85550000 | 4.24750000  | 2.32710000   | O  | 11.58570000 | 2.73090000   | -1.97390000  |
| O  | -2.86160000  | 13.40650000 | -0.86600000  | O  | 15.08840000 | 2.45570000   | -2.67990000  |
| O  | -2.02900000  | 13.44560000 | 2.61160000   | O  | 4.78440000  | 13.04680000  | 0.97940000   |
| O  | -0.01170000  | 12.08510000 | 1.56820000   | O  | 3.95020000  | 13.02580000  | -2.50220000  |
| O  | -11.33830000 | 2.01250000  | 3.66340000   | O  | 14.58200000 | 0.18390000   | -1.41360000  |
| O  | 1.33810000   | 1.30730000  | 12.14150000  | O  | 1.93450000  | 14.38650000  | -1.45560000  |
| Zr | -12.69890000 | 3.22320000  | 2.71600000   | Zr | 13.23740000 | 1.41420000   | -2.36050000  |
| Zr | -1.28920000  | 13.36590000 | 0.59700000   | Zr | 3.21450000  | 13.10670000  | -0.48570000  |
| O  | -14.24190000 | 2.26810000  | 1.75750000   | C  | -0.43500000 | 4.88330000   | -8.73920000  |
| C  | 15.44290000  | -1.01780000 | -5.99310000  | C  | -0.21750000 | 5.83520000   | -7.74360000  |
| C  | 12.70310000  | 2.25850000  | -5.33430000  | C  | -0.28160000 | 9.36940000   | -5.19920000  |
| C  | 16.28250000  | 1.89940000  | -2.93230000  | C  | -0.58590000 | 8.37330000   | -6.12750000  |
| O  | 16.62240000  | 0.60680000  | -3.04740000  | O  | 1.87960000  | 13.09430000  | -3.77300000  |
| O  | 16.31380000  | -2.96220000 | -3.12560000  | O  | -1.59460000 | 13.30460000  | -2.93800000  |
| O  | 16.80820000  | -1.24530000 | -1.32940000  | O  | -1.96550000 | 3.58540000   | -10.99630000 |
| O  | 16.12920000  | -1.10790000 | -4.84400000  | O  | -2.72720000 | 3.74000000   | -14.49980000 |
| O  | 14.11460000  | 0.27790000  | -3.82980000  | O  | -4.11890000 | 3.71450000   | -12.37250000 |
| Zr | 15.30860000  | -1.08230000 | -2.85880000  | O  | -0.61720000 | 3.62530000   | -13.11370000 |
| C  | 8.22410000   | -0.99030000 | -6.95360000  | O  | 0.23920000  | 14.98930000  | -3.39710000  |
| C  | 7.08430000   | -0.88910000 | -7.75710000  | O  | 0.03790000  | 11.40800000  | -3.29800000  |
| C  | -0.07890000  | 0.19680000  | -16.44060000 | O  | 1.80890000  | 11.92610000  | -1.40670000  |
| C  | -2.98330000  | 3.33020000  | -15.75110000 | O  | -0.99970000 | 1.31960000   | -11.85230000 |
| C  | 0.60510000   | 3.13550000  | -13.36990000 | O  | 11.70830000 | 0.47680000   | -3.36020000  |
| C  | 3.54370000   | 0.41880000  | -10.13290000 | Zr | -2.40750000 | 2.48420000   | -12.78720000 |
| C  | 4.71900000   | 0.33900000  | -9.38010000  | Zr | 0.42100000  | 13.21500000  | -2.20080000  |
| O  | 14.12290000  | -0.89740000 | -6.19960000  | O  | -3.88950000 | 1.47330000   | -13.78890000 |
| O  | 10.61540000  | -0.65980000 | -5.49590000  | O  | 1.56470000  | 16.75480000  | 1.71980000   |
| O  | 1.01360000   | 1.86380000  | -13.49200000 | O  | 0.72650000  | 16.72100000  | -1.76270000  |
| O  | 0.90250000   | -1.70940000 | -13.57470000 | O  | -0.59450000 | 16.83720000  | 0.39520000   |
| O  | 1.28320000   | 0.04790000  | -11.76680000 | O  | 2.88450000  | 16.63800000  | -0.43700000  |
| O  | 0.61250000   | 0.13480000  | -15.29270000 | O  | 2.50850000  | 14.40700000  | 0.94000000   |
| O  | 12.50660000  | 1.01980000  | -5.81070000  | Zr | 1.08360000  | 15.55370000  | 0.00510000   |
| O  | 12.23070000  | -2.54680000 | -5.89790000  | O  | -0.45580000 | 14.52290000  | -0.88150000  |
| O  | 13.90460000  | -2.17530000 | -3.88530000  | H  | -0.62650000 | -16.92080000 | 4.14710000   |



|   |              |              |              |   |              |              |              |
|---|--------------|--------------|--------------|---|--------------|--------------|--------------|
| H | 2.72980000   | -17.21660000 | -0.07220000  | O | 7.83750000   | -8.14030000  | -2.54210000  |
| H | -1.48640000  | -17.08970000 | -3.43700000  | H | -2.60160000  | -7.35130000  | -8.38090000  |
| H | -4.84290000  | -16.79650000 | 0.78560000   | H | -0.97380000  | -8.75060000  | -7.29330000  |
| H | 2.92920000   | -3.89700000  | 16.92310000  | O | -9.87800000  | 1.71700000   | -5.66230000  |
| H | 5.97920000   | -4.24530000  | 12.47090000  | O | -9.14100000  | -0.65830000  | -6.97640000  |
| H | -12.42200000 | -2.98130000  | 6.40880000   | O | 5.52490000   | -1.81800000  | 4.92350000   |
| H | -17.38880000 | 1.30930000   | -0.25050000  | H | 3.40330000   | -1.01120000  | -6.53180000  |
| H | -16.93470000 | -2.57770000  | 3.46770000   | O | -1.26730000  | 5.51520000   | -3.85410000  |
| H | -0.41170000  | 0.29210000   | 17.57630000  | O | 3.15740000   | 5.77350000   | 4.33350000   |
| H | 3.71220000   | 3.69550000   | 16.86160000  | H | -5.16210000  | 4.92080000   | 2.11300000   |
| H | -0.70210000  | 4.12840000   | 13.78060000  | H | 6.05990000   | 4.29630000   | -1.94650000  |
| H | -15.82790000 | 1.13380000   | 7.22380000   | H | 5.22640000   | 5.63980000   | 0.08630000   |
| H | -16.28910000 | 5.02520000   | 3.51830000   | H | -4.18570000  | 6.21990000   | 0.10010000   |
| H | 17.49170000  | -1.34260000  | 0.59930000   | H | 5.04250000   | 0.70800000   | -5.53140000  |
| H | 16.43910000  | -5.00440000  | -3.22880000  | O | 6.41890000   | 0.39450000   | 3.42230000   |
| H | -6.96460000  | 0.40760000   | -15.85800000 | O | 1.03740000   | 4.41320000   | 5.59740000   |
| H | -3.34020000  | -3.50170000  | -16.72500000 | O | -3.34650000  | 5.45030000   | -5.77050000  |
| H | -6.35150000  | -3.54780000  | -12.24130000 | P | -2.91310000  | 5.10960000   | -4.14240000  |
| H | 6.76530000   | 3.34500000   | 12.42850000  | O | -3.16020000  | 3.46630000   | -3.82950000  |
| H | -13.35400000 | 4.80510000   | -1.00670000  | O | -3.79230000  | 5.92080000   | -3.21820000  |
| H | -6.09460000  | 4.07230000   | -11.96560000 | P | 7.02930000   | -0.36290000  | -10.29110000 |
| H | 2.06050000   | 17.07890000  | 3.68080000   | O | 6.56200000   | -1.15190000  | -11.71290000 |
| H | -2.54560000  | 17.25610000  | 0.85860000   | O | 8.39340000   | 0.25790000   | -10.48750000 |
| H | 16.04580000  | -1.04680000  | -6.89000000  | H | 6.22190000   | -0.43160000  | -12.30150000 |
| H | 12.61560000  | 3.04960000   | -6.06590000  | P | -1.09950000  | -4.24500000  | -4.25930000  |
| H | 17.09550000  | 2.59990000   | -3.06290000  | O | -2.07110000  | -3.10340000  | -4.44120000  |
| H | 0.52370000   | 0.20340000   | -17.33810000 | O | -0.07230000  | -4.19010000  | -3.15900000  |
| H | -3.11010000  | 4.12260000   | -16.47550000 | P | -10.31020000 | 0.59550000   | -6.88850000  |
| H | 0.27200000   | 17.00870000  | -3.73940000  | O | -11.66200000 | -0.00140000  | -6.57000000  |
| H | 4.86770000   | 16.83080000  | -0.91260000  | O | -10.38820000 | 1.39980000   | -8.37480000  |
| H | 13.42740000  | -4.84430000  | 1.24280000   | H | -10.30950000 | 0.68350000   | -9.05420000  |
| H | 14.07420000  | 2.75660000   | 1.41930000   | P | -7.90910000  | 9.41460000   | 1.99260000   |
| H | -11.76960000 | 4.62350000   | 6.45360000   | O | -9.07000000  | 9.39960000   | 2.96060000   |
| H | -1.48910000  | -3.46260000  | 13.84430000  | O | -7.83720000  | 10.92100000  | 1.22600000   |
| H | 7.05570000   | -0.49590000  | 16.20880000  | H | -7.39070000  | 11.51620000  | 1.87960000   |
| H | 5.55370000   | 13.02900000  | 2.87790000   | P | -9.43170000  | -8.24070000  | 0.82690000   |
| H | -1.85520000  | 13.49050000  | 4.65220000   | P | 8.08330000   | -9.39950000  | -1.40060000  |
| H | 3.77460000   | 12.98020000  | -4.54280000  | P | 9.42360000   | 8.32930000   | -1.57830000  |
| H | 2.50000000   | -13.47960000 | -3.96650000  | O | -10.74010000 | -7.91390000  | 0.14420000   |
| H | -4.21560000  | -12.88440000 | 4.45880000   | O | -9.47080000  | -9.84190000  | 1.37180000   |
| H | -13.98450000 | -2.79800000  | -1.05610000  | O | 9.53280000   | -9.41320000  | -0.97200000  |
| H | 1.13980000   | -3.74060000  | -13.69420000 | O | 7.69640000   | -10.88230000 | -2.11760000  |
| H | 11.99290000  | -4.55210000  | -6.24270000  | O | 9.54520000   | 9.79740000   | -0.74640000  |
| H | -3.63330000  | 13.40560000  | -2.76360000  | O | 10.59760000  | 8.18930000   | -2.52000000  |
| H | 3.35760000   | -13.31570000 | 3.61260000   | H | 7.53590000   | -11.49640000 | -1.35740000  |
| H | -5.07250000  | -13.07390000 | -3.11930000  | H | 9.20450000   | 10.47680000  | -1.38150000  |
| H | 1.37860000   | 3.87950000   | -13.49950000 | H | -9.26880000  | -10.38680000 | 0.56980000   |
| H | 1.54170000   | -7.43690000  | 8.56990000   | P | -3.24590000  | 0.47400000   | 5.15370000   |
| H | -0.62690000  | -8.19160000  | 7.40680000   | O | -1.76630000  | 1.28440000   | 5.02250000   |
| O | -8.14430000  | -8.05260000  | -0.29530000  | O | -3.55100000  | -0.22430000  | 3.84830000   |
| O | -9.21620000  | -7.19520000  | 2.17390000   | H | -1.91780000  | 1.97780000   | 4.33170000   |
| H | -6.85790000  | -0.42370000  | 8.88530000   | P | 2.11330000   | 4.41450000   | 4.25790000   |
| H | -5.33640000  | 1.39060000   | 9.88200000   | O | 3.04060000   | 3.00150000   | 4.27570000   |
| O | 7.08570000   | -9.15090000  | -0.02560000  | O | 1.31520000   | 4.47330000   | 2.97640000   |

|   |             |             |             |              |             |              |              |
|---|-------------|-------------|-------------|--------------|-------------|--------------|--------------|
| H | 3.59880000  | 3.07710000  | 5.09030000  | H            | 1.05030000  | -2.19110000  | 1.16370000   |
| P | 1.33160000  | -4.35170000 | 4.35250000  | C            | 0.70740000  | 0.85660000   | 2.63140000   |
| O | 2.55970000  | -3.20030000 | 4.52030000  | H            | -0.06760000 | 2.61340000   | 1.64700000   |
| O | 0.63570000  | -4.14640000 | 3.02810000  | H            | 1.43540000  | -1.05460000  | 3.31640000   |
| H | 3.04290000  | -3.46330000 | 5.34370000  | H            | 0.86690000  | 1.35240000   | 3.58460000   |
| P | 5.13930000  | -0.72860000 | 3.65390000  | C            | -1.10980000 | -10.20060000 | -2.86290000  |
| O | 4.91440000  | -1.50670000 | 2.37770000  | C            | -1.97910000 | -3.01040000  | -9.96550000  |
| O | 3.72800000  | 0.11380000  | 4.04860000  |              |             |              |              |
| H | 3.85220000  | 0.39290000  | 4.99030000  |              |             |              |              |
| H | -3.19610000 | 3.03640000  | -4.72100000 | (E)-syn-TS-S |             |              |              |
| C | 0.01110000  | -1.16940000 | -1.11980000 | H            | 1.58290000  | -6.49070000  | 10.02550000  |
| N | -0.49050000 | -2.43550000 | -1.09250000 | H            | -0.18990000 | -10.53970000 | 4.71960000   |
| C | -1.20620000 | -3.10830000 | -0.07540000 | H            | -9.72400000 | -2.47340000  | 6.24200000   |
| C | -1.05680000 | -4.50720000 | -0.03290000 | H            | -4.48840000 | -10.62710000 | -1.91460000  |
| C | -2.01260000 | -2.46750000 | 0.87790000  | H            | -9.77250000 | -6.76050000  | 0.82020000   |
| C | -1.63910000 | -5.23780000 | 0.99720000  | H            | -4.99040000 | -0.49470000  | 10.88280000  |
| H | -0.46450000 | -4.99550000 | -0.80050000 | H            | 6.13770000  | 0.69950000   | 10.12440000  |
| C | -2.59240000 | -3.21630000 | 1.90300000  | H            | 7.68400000  | 0.98790000   | 8.25270000   |
| H | -2.16770000 | -1.39650000 | 0.83740000  | H            | 6.63110000  | -9.73990000  | 0.11100000   |
| C | -2.39060000 | -4.59390000 | 1.98420000  | H            | 10.79460000 | -4.39130000  | -1.91210000  |
| H | -1.48420000 | -6.31240000 | 1.03830000  | H            | 2.43720000  | 0.44710000   | -7.54140000  |
| H | -3.19850000 | -2.71230000 | 2.65050000  | H            | -2.15830000 | -1.71990000  | 7.86220000   |
| H | -2.80640000 | -5.15850000 | 2.81310000  | H            | 2.19490000  | -7.82880000  | 2.36370000   |
| C | -3.87010000 | -1.39790000 | -1.90150000 | H            | -0.24130000 | -7.44010000  | -3.38840000  |
| C | -4.22640000 | -0.30280000 | -1.19460000 | H            | 7.89220000  | -2.06040000  | 0.27440000   |
| C | -2.06930000 | -0.04130000 | -2.53910000 | H            | -7.24330000 | -3.47940000  | -0.40300000  |
| N | -2.76530000 | -1.23780000 | -2.70050000 | O            | -3.86340000 | -1.86520000  | 5.90900000   |
| H | -2.43650000 | -2.00060000 | -3.35330000 | O            | 2.45400000  | -5.99730000  | 4.18710000   |
| H | -4.36870000 | -2.35870000 | -1.89970000 | O            | -0.72930000 | -5.45170000  | -4.86760000  |
| H | -5.05570000 | -0.19400000 | -0.51120000 | H            | 6.37410000  | -3.97480000  | 0.29840000   |
| S | -3.16020000 | 1.04900000  | -1.55660000 | H            | -5.39560000 | -5.03810000  | -0.75140000  |
| C | -1.42740000 | 0.58920000  | -3.75350000 | H            | -2.14570000 | -8.05820000  | 0.63670000   |
| C | -0.62090000 | 1.72970000  | -3.61220000 | H            | 3.54290000  | -7.18150000  | -1.49150000  |
| C | -1.63400000 | 0.05950000  | -5.03510000 | H            | 7.63200000  | 1.26270000   | 2.51900000   |
| C | -0.04360000 | 2.33670000  | -4.72600000 | H            | -7.59710000 | -1.39520000  | -2.27800000  |
| H | -0.45010000 | 2.15750000  | -2.62720000 | H            | 0.22930000  | -3.28450000  | 7.46210000   |
| C | -1.04090000 | 0.66340000  | -6.14560000 | H            | 0.48500000  | -2.04870000  | -7.58310000  |
| H | -2.23670000 | -0.83090000 | -5.16960000 | H            | -4.05680000 | -6.54720000  | 0.87200000   |
| C | -0.24940000 | 1.80170000  | -5.99980000 | H            | 5.10870000  | -5.30830000  | -1.51710000  |
| H | 0.56830000  | 3.22540000  | -4.59830000 | H            | -5.99890000 | -1.12530000  | -4.10580000  |
| H | -1.20650000 | 0.23460000  | -7.12950000 | O            | 0.21490000  | -4.66520000  | 5.26570000   |
| H | 0.20670000  | 2.26790000  | -6.86880000 | O            | 0.94600000  | -3.80000000  | -5.80950000  |
| H | -0.27480000 | -3.04560000 | -1.91360000 | C            | 4.27660000  | -13.01960000 | 2.18400000   |
| H | -1.05680000 | -0.35120000 | -1.76300000 | C            | 1.55310000  | -16.35720000 | 1.88530000   |
| C | 1.09670000  | -0.98330000 | -2.17400000 | C            | 4.65980000  | -15.84020000 | -1.06650000  |
| H | 2.01890000  | -1.46000000 | -1.81710000 | O            | 2.63540000  | -14.30300000 | 0.22960000   |
| H | 0.81820000  | -1.45290000 | -3.12110000 | H            | -0.24500000 | -4.88050000  | -10.79750000 |
| H | 1.30380000  | 0.07460000  | -2.34350000 | H            | 1.95620000  | -9.69270000  | -6.37840000  |
| C | 0.24290000  | -0.44750000 | 0.18210000  | H            | -6.01070000 | -0.85440000  | -9.88650000  |
| C | -0.03950000 | 0.91560000  | 0.33230000  | C            | -1.64660000 | -13.19550000 | -4.08870000  |
| C | 0.80160000  | -1.14080000 | 1.26930000  | C            | 1.69190000  | -15.92660000 | -4.20420000  |
| C | 0.18460000  | 1.56200000  | 1.54890000  | C            | -1.41090000 | -16.44680000 | -1.25010000  |
| H | -0.46410000 | 1.47540000  | -0.49290000 | O            | 1.71040000  | -16.46980000 | -2.97760000  |
| C | 1.02460000  | -0.49530000 | 2.48200000  | O            | 1.62990000  | -16.72230000 | 0.59660000   |
|   |             |             |             | O            | 3.45180000  | -16.41920000 | -1.13760000  |

|    |              |              |             |    |              |              |             |
|----|--------------|--------------|-------------|----|--------------|--------------|-------------|
| O  | -0.11050000  | -16.77570000 | -1.24340000 | C  | 0.32680000   | -9.59570000  | 4.59660000  |
| O  | 0.24490000   | -14.37360000 | -2.30240000 | C  | 0.31540000   | -8.67500000  | 5.64530000  |
| Zr | 1.55030000   | -15.41970000 | -1.11010000 | O  | -0.54880000  | -13.53930000 | 2.49130000  |
| H  | 10.74260000  | -0.28910000  | 5.08180000  | O  | 3.01180000   | -13.17640000 | 2.60320000  |
| H  | 9.10480000   | -0.63790000  | 6.85590000  | O  | 1.04380000   | -4.37340000  | 11.27210000 |
| H  | 1.33460000   | 4.80230000   | 10.78830000 | O  | 1.29200000   | -4.66570000  | 14.84290000 |
| H  | 1.07020000   | 6.61560000   | 9.16900000  | O  | 2.94750000   | -4.38300000  | 12.94560000 |
| H  | -1.21610000  | 9.79620000   | 6.74800000  | O  | -0.61730000  | -4.66370000  | 13.17420000 |
| H  | -0.96350000  | 7.90690000   | 8.27390000  | O  | 1.41320000   | -15.13820000 | 2.42770000  |
| C  | 4.16310000   | -1.03950000  | 16.18890000 | O  | 1.03460000   | -11.57190000 | 2.65250000  |
| C  | 1.34780000   | -4.30830000  | 16.13450000 | O  | -0.06400000  | -12.10580000 | 0.32520000  |
| C  | 4.16770000   | -3.82750000  | 12.89200000 | O  | -0.31600000  | -2.26470000  | 12.11420000 |
| O  | 2.31190000   | -2.25970000  | 14.39670000 | O  | -11.69050000 | -2.55520000  | 1.95810000  |
| H  | -3.35110000  | 1.17450000   | -7.15950000 | Zr | 1.07900000   | -3.34540000  | 13.16240000 |
| H  | 3.45280000   | -1.50690000  | 7.56690000  | Zr | 1.26100000   | -13.27900000 | 1.36330000  |
| H  | -1.50670000  | 7.60730000   | -1.82270000 | H  | -10.70500000 | 0.31130000   | -4.74090000 |
| H  | 0.32620000   | 7.38640000   | 3.51430000  | C  | -4.38950000  | -9.74320000  | -1.29600000 |
| H  | -7.70190000  | 1.97660000   | 1.69210000  | C  | -5.49100000  | -8.89270000  | -1.14980000 |
| H  | 7.28570000   | 3.72070000   | -0.87590000 | C  | -16.34700000 | -1.36180000  | -1.92990000 |
| H  | -4.97730000  | 0.88710000   | -5.35680000 | C  | -13.02720000 | -4.07760000  | -2.40590000 |
| H  | 2.23220000   | 7.81670000   | 1.52060000  | C  | -15.86020000 | -4.66530000  | 0.80470000  |
| H  | -3.63370000  | 7.37440000   | 0.07860000  | C  | -8.82710000  | -6.37520000  | 0.45850000  |
| H  | 7.44180000   | 2.34220000   | -3.13490000 | C  | -7.78100000  | -7.27540000  | 0.23660000  |
| H  | -7.49410000  | 0.01940000   | 3.51570000  | O  | -12.90890000 | -4.64790000  | -1.19730000 |
| H  | -0.83780000  | 2.14800000   | 8.17090000  | O  | -12.66160000 | -4.98100000  | 2.35680000  |
| H  | -2.92710000  | 3.85850000   | -7.72400000 | O  | -1.99360000  | -15.24070000 | -1.17920000 |
| O  | -5.40910000  | 0.32370000   | 5.03770000  | O  | -2.34130000  | -11.67940000 | -0.96350000 |
| H  | -6.38840000  | 9.60260000   | 2.54420000  | O  | -11.00980000 | -4.62350000  | 0.47080000  |
| O  | -8.21740000  | 7.75800000   | 2.66810000  | O  | -14.56500000 | -4.99330000  | 0.68680000  |
| H  | -10.89090000 | 4.58440000   | 0.40190000  | O  | -2.12940000  | -13.34220000 | -2.84570000 |
| O  | -9.48250000  | 6.76480000   | 0.35880000  | O  | -2.21800000  | -13.57970000 | 0.72460000  |
| C  | 1.29410000   | -6.10610000  | 9.05540000  | O  | 0.18720000   | -14.54760000 | 0.15510000  |
| C  | 1.32280000   | -6.96860000  | 7.95600000  | O  | -14.30570000 | -2.56630000  | -0.34700000 |
| C  | -1.79270000  | -13.62580000 | 1.99620000  | Zr | -12.89990000 | -3.63700000  | 0.69830000  |
| C  | -9.86110000  | -1.29320000  | 3.78180000  | Zr | -0.99150000  | -13.34760000 | -1.02340000 |
| C  | -2.33940000  | -1.06340000  | 10.49810000 | C  | -1.91060000  | -1.51320000  | 16.58630000 |
| C  | 0.90860000   | -3.82930000  | 10.04930000 | C  | 0.90110000   | 1.75850000   | 16.64210000 |
| C  | 1.02400000   | -10.27530000 | 2.29530000  | C  | -2.34660000  | 1.76060000   | 13.79690000 |
| C  | -12.61850000 | -4.64550000  | 3.65480000  | O  | -0.62330000  | -1.45080000  | 16.95870000 |
| C  | -1.90530000  | -4.30680000  | 13.29200000 | O  | 2.94060000   | -1.17120000  | 16.72560000 |
| C  | -9.78890000  | -4.06400000  | 0.42700000  | O  | 1.28850000   | -3.09030000  | 16.69370000 |
| C  | -2.03110000  | -10.38680000 | -0.76640000 | O  | 1.02760000   | 0.46950000   | 16.99150000 |
| C  | -8.74420000  | -1.24650000  | 4.74950000  | O  | -0.31730000  | -0.00460000  | 14.76170000 |
| C  | -3.43200000  | -1.09150000  | 9.50000000  | Zr | 1.07420000   | -1.21790000  | 15.66260000 |
| C  | 0.91040000   | -4.76350000  | 8.89790000  | C  | -8.83600000  | -1.91030000  | 5.98240000  |
| C  | 0.98820000   | -9.29560000  | 3.39820000  | C  | -7.77350000  | -1.87000000  | 6.88780000  |
| C  | -8.65850000  | -4.99950000  | 0.22590000  | C  | -15.93450000 | -1.92290000  | 4.13740000  |
| C  | -3.17400000  | -9.45890000  | -0.65360000 | C  | -13.17360000 | 1.40190000   | 4.25420000  |
| C  | -6.59840000  | -1.16310000  | 6.58230000  | C  | -16.42760000 | 1.38040000   | 1.41030000  |
| C  | -5.49520000  | -1.11390000  | 7.57150000  | C  | -4.74910000  | -0.76890000  | 9.86330000  |
| C  | 0.97990000   | -6.50600000  | 6.67460000  | C  | -5.76950000  | -0.78140000  | 8.90890000  |
| C  | 0.97620000   | -7.44050000  | 5.52390000  | O  | -14.65070000 | -1.84050000  | 4.51770000  |
| C  | -6.52490000  | -6.80030000  | -0.19720000 | O  | -11.08660000 | -1.49860000  | 4.29530000  |
| C  | -5.37890000  | -7.72340000  | -0.36740000 | O  | -2.45260000  | -3.08930000  | 13.42760000 |

|    |              |              |              |    |             |              |              |
|----|--------------|--------------|--------------|----|-------------|--------------|--------------|
| O  | -2.71090000  | 0.47100000   | 13.73100000  | O  | 13.40280000 | -1.90420000  | -2.77630000  |
| O  | -2.69980000  | -1.15750000  | 11.79070000  | O  | 13.58990000 | -2.31770000  | 0.77090000   |
| O  | -2.45640000  | -1.44970000  | 15.36260000  | O  | 4.60350000  | -10.98220000 | -0.72010000  |
| O  | -12.70720000 | -3.43920000  | 4.23470000   | O  | 4.98770000  | -14.54340000 | -0.96530000  |
| O  | -13.03050000 | 0.10990000   | 4.58610000   | O  | 15.28070000 | -1.94590000  | -1.07890000  |
| O  | -0.13880000  | -2.45270000  | 14.55660000  | O  | 11.71160000 | -2.25710000  | -0.92810000  |
| O  | -14.36710000 | -0.35730000  | 2.34290000   | O  | 4.76120000  | -12.89000000 | 0.93960000   |
| Zr | -1.40170000  | -1.21720000  | 13.50630000  | O  | 4.84830000  | -12.63770000 | -2.62930000  |
| Zr | -12.95390000 | -1.55580000  | 3.23180000   | O  | 2.44540000  | -11.68750000 | -2.06140000  |
| O  | -16.43230000 | -3.46130000  | 0.95470000   | O  | 12.01320000 | 0.16870000   | -1.89970000  |
| O  | -16.76520000 | 0.08620000   | 1.30880000   | O  | 0.66040000  | -0.01370000  | -11.98520000 |
| O  | -16.71690000 | -1.52220000  | -0.65020000  | Zr | 13.39930000 | -0.93340000  | -0.86030000  |
| O  | -16.47520000 | -1.85240000  | 2.91160000   | Zr | 3.62340000  | -12.88700000 | -0.88280000  |
| O  | -14.13960000 | -2.79530000  | 2.10140000   | C  | -0.01120000 | -4.62670000  | -9.76630000  |
| Zr | -15.41950000 | -1.57000000  | 1.06200000   | C  | 0.16410000  | -5.67290000  | -8.86450000  |
| H  | 10.06070000  | 0.52860000   | -6.04170000  | C  | -4.06230000 | 0.96030000   | -15.85080000 |
| O  | 8.30670000   | 0.37370000   | -7.95640000  | C  | -0.61530000 | -1.59340000  | -16.34760000 |
| H  | 4.50420000   | 10.97140000  | -0.35550000  | C  | -3.40210000 | -2.32580000  | -13.13330000 |
| O  | 6.66680000   | 9.57800000   | -0.73660000  | C  | 1.41590000  | -8.81260000  | -6.03820000  |
| H  | 9.90510000   | 6.58960000   | 1.00750000   | C  | 1.28680000  | -7.73810000  | -6.91540000  |
| O  | 8.09880000   | 8.41700000   | 1.39320000   | O  | 3.18000000  | -12.69320000 | -4.39630000  |
| C  | 16.39330000  | 1.29080000   | 2.31750000   | O  | -0.38280000 | -13.02940000 | -4.50690000  |
| C  | 13.62200000  | -2.01140000  | 2.07650000   | O  | -0.45650000 | -2.15980000  | -15.14200000 |
| C  | 16.49580000  | -1.37760000  | -1.07640000  | O  | -0.19880000 | -2.48350000  | -11.58550000 |
| O  | 14.59550000  | 0.11360000   | 0.44010000   | O  | 1.44230000  | -2.05820000  | -13.46650000 |
| H  | 4.89010000   | 2.40540000   | -10.51020000 | O  | -2.09250000 | -2.58910000  | -13.25700000 |
| O  | 7.00760000   | 2.63340000   | -9.02360000  | O  | 1.24330000  | -11.07570000 | -4.31400000  |
| H  | 0.61810000   | 5.89040000   | -9.07640000  | O  | 1.57530000  | -14.64260000 | -4.57520000  |
| H  | 0.47720000   | 7.42400000   | -7.16930000  | O  | 2.69300000  | -14.12940000 | -2.22780000  |
| H  | -1.18420000  | 10.84660000  | -4.66560000  | O  | -1.95440000 | -0.15160000  | -14.28280000 |
| H  | -1.21640000  | 9.23710000   | -6.49660000  | Zr | -0.49370000 | -1.15430000  | -13.24440000 |
| C  | 6.29230000   | -8.77980000  | -0.25880000  | Zr | 1.37000000  | -12.95080000 | -3.26810000  |
| C  | 7.19740000   | -7.71430000  | -0.28700000  | C  | 9.70930000  | -0.02430000  | 4.89530000   |
| C  | 4.42310000   | -12.59660000 | -3.90100000  | C  | 8.77250000  | -0.22810000  | 5.90980000   |
| C  | 2.41100000   | 1.33320000   | -10.13670000 | C  | 10.30850000 | 0.72880000   | 2.57980000   |
| C  | 9.98640000   | 1.42160000   | -3.47990000  | C  | 3.72130000  | -0.56530000  | 10.10450000  |
| C  | 13.30340000  | -1.30620000  | -3.97290000  | C  | 2.09840000  | 13.22510000  | 4.02980000   |
| C  | 4.03770000   | -9.76240000  | -0.72810000  | C  | 13.08660000 | 4.02200000   | 2.81230000   |
| C  | 10.41260000  | -1.94360000  | -0.78320000  | C  | -0.65240000 | 9.86910000   | 4.07260000   |
| C  | 2.62280000   | -1.42120000  | -13.48670000 | C  | 0.45380000  | 2.22940000   | 10.56050000  |
| C  | 3.52290000   | 1.40320000   | -9.15970000  | C  | 3.72480000  | 2.23520000   | 13.41830000  |
| C  | 8.89160000   | 1.44390000   | -4.46990000  | C  | 2.08070000  | 10.43990000  | 0.76480000   |
| C  | 0.07920000   | -3.28970000  | -9.34160000  | C  | 9.88160000  | 4.10120000   | -0.10330000  |
| C  | 0.88680000   | -8.73780000  | -4.74010000  | C  | 9.31500000  | 0.50740000   | 3.65640000   |
| C  | 4.97030000   | -8.61320000  | -0.70280000  | C  | 4.67030000  | -0.41130000  | 8.98310000   |
| C  | 9.46910000   | -3.08310000  | -0.80780000  | C  | -0.47580000 | 8.73540000   | 5.00830000   |
| C  | 5.67960000   | 1.46460000   | -7.33540000  | C  | 0.28220000  | 3.33330000   | 9.59470000   |
| C  | 6.80370000   | 1.48250000   | -6.36830000  | C  | 3.22530000  | 9.51570000   | 0.61050000   |
| C  | 0.44570000   | -5.44290000  | -7.50940000  | C  | 8.74600000  | 5.04030000   | 0.03600000   |
| C  | 0.61320000   | -6.56050000  | -6.55430000  | C  | 7.41960000  | 0.09020000   | 5.70960000   |
| C  | 6.78010000   | -6.44580000  | -0.74420000  | C  | 6.45520000  | -0.07720000  | 6.82290000   |
| C  | 7.71660000   | -5.29680000  | -0.76770000  | C  | -0.19620000 | 6.54820000   | 6.77360000   |
| C  | 9.83740000   | -4.29520000  | -1.41400000  | C  | -0.02150000 | 5.42600000   | 7.72630000   |
| C  | 8.98090000   | -5.40000000  | -1.38820000  | C  | 5.44240000  | 7.78170000   | 0.38620000   |

|    |              |             |              |   |             |             |             |
|----|--------------|-------------|--------------|---|-------------|-------------|-------------|
| C  | 6.59130000   | 6.85280000  | 0.25970000   | C | -4.89750000 | 8.63820000  | 1.30640000  |
| C  | 5.88060000   | 0.27500000  | 9.16170000   | C | -6.44740000 | -0.12160000 | -6.58740000 |
| C  | 6.76200000   | 0.44250000  | 8.09180000   | C | -7.43210000 | -0.27620000 | -5.48860000 |
| O  | 11.59790000  | 0.75910000  | 2.95930000   | C | -1.39610000 | 7.49740000  | -5.22240000 |
| O  | 15.16290000  | 1.12260000  | 2.82470000   | C | -1.31700000 | 6.53270000  | -6.34370000 |
| O  | 4.27180000   | 1.01780000  | 13.28290000  | C | -7.65900000 | 5.34000000  | 1.16440000  |
| O  | 4.53030000   | -2.53770000 | 12.96200000  | C | -6.71740000 | 6.48360000  | 1.21390000  |
| O  | 4.52950000   | -0.90580000 | 14.90540000  | C | -3.06590000 | -8.29130000 | 0.11740000  |
| O  | 4.25540000   | -0.59130000 | 11.33830000  | C | 4.55500000  | -7.34400000 | -1.14170000 |
| O  | 13.54400000  | -0.81700000 | 2.68210000   | C | 3.14030000  | 8.18830000  | 1.06200000  |
| O  | 13.21400000  | 2.72130000  | 3.11490000   | C | -4.57450000 | 7.46280000  | 0.60820000  |
| O  | 1.96000000   | 0.38260000  | 12.15440000  | C | 7.62880000  | 1.95190000  | -4.12770000 |
| O  | 11.93260000  | 2.32430000  | 0.84330000   | C | 7.96110000  | 0.82950000  | 3.45570000  |
| O  | 0.22450000   | 11.96900000 | 2.30460000   | C | -7.57510000 | -0.52810000 | 4.44690000  |
| Zr | 3.21940000   | -0.85310000 | 13.20440000  | C | -7.93930000 | -0.96220000 | -3.21000000 |
| Zr | 13.32110000  | 1.09090000  | 1.72040000   | C | -0.40300000 | 3.11650000  | 8.38790000  |
| C  | -4.28120000  | 0.66240000  | -7.37180000  | C | 0.54410000  | -4.30910000 | 7.61770000  |
| C  | 4.36740000   | -0.94590000 | 7.71950000   | C | 0.37510000  | -3.04860000 | -7.99380000 |
| C  | 3.37270000   | 0.89120000  | -7.85900000  | C | -2.17560000 | 4.62800000  | -7.59060000 |
| C  | -3.16000000  | -1.43920000 | 8.16500000   | C | -4.15680000 | -7.43210000 | 0.25690000  |
| C  | -1.44680000  | 7.97650000  | -2.83910000  | C | 5.45040000  | -6.27240000 | -1.16040000 |
| C  | 1.64630000   | -8.06150000 | 3.26880000   | C | 4.23750000  | 7.33090000  | 0.95030000  |
| C  | 0.02610000   | 7.50530000  | 4.54840000   | C | -5.47570000 | 6.39650000  | 0.56300000  |
| C  | 0.21860000   | -7.56580000 | -4.36470000  | C | 6.59790000  | 1.97690000  | -5.07000000 |
| C  | -8.07700000  | 2.95720000  | 1.42690000   | C | 7.01330000  | 0.61190000  | 4.46210000  |
| C  | 8.20460000   | -2.98050000 | -0.20420000  | C | -6.50270000 | -0.48940000 | 5.34450000  |
| C  | -7.40680000  | -4.53260000 | -0.21050000  | C | -7.02470000 | -0.81060000 | -4.25520000 |
| C  | 7.46470000   | 4.68610000  | -0.41920000  | C | -0.55130000 | 4.14620000  | 7.45290000  |
| C  | -5.21280000  | 0.50350000  | -6.34240000  | C | 0.59370000  | -5.16160000 | 6.51190000  |
| C  | 5.24350000   | -0.77770000 | 6.64140000   | C | 0.56100000  | -4.10290000 | -7.10340000 |
| C  | 4.43920000   | 0.92480000  | -6.95710000  | C | -2.27860000 | 5.50930000  | -6.50730000 |
| C  | -4.17310000  | -1.43930000 | 7.20160000   | O | -2.31990000 | 0.55440000  | -9.41560000 |
| C  | -1.50250000  | 7.05200000  | -3.88880000  | O | 2.42770000  | -0.65750000 | 9.75840000  |
| C  | 1.64440000   | -7.13120000 | 4.31510000   | O | 1.19020000  | 1.09650000  | -9.62880000 |
| C  | 0.15400000   | 6.41260000  | 5.41270000   | O | -1.10230000 | -0.94790000 | 9.99180000  |
| C  | 0.07320000   | -6.50700000 | -5.25670000  | O | -1.09210000 | 9.81150000  | -0.75670000 |
| C  | -7.20590000  | 4.04810000  | 1.47880000   | O | 1.06260000  | -9.75380000 | 1.05940000  |
| C  | 7.33780000   | -4.07570000 | -0.18590000  | O | -0.72620000 | 9.54200000  | 2.77260000  |
| C  | -6.35100000  | -5.42370000 | -0.41590000  | O | 0.89110000  | -9.53280000 | -2.48800000 |
| C  | 6.40000000   | 5.58260000  | -0.30780000  | O | -9.80100000 | 0.77570000  | 0.89680000  |
| C  | -3.60530000  | 0.40660000  | -9.77270000  | O | 9.86870000  | -0.72870000 | -0.60170000 |
| C  | -10.26040000 | -0.76190000 | -2.27920000  | O | -9.47130000 | -2.76290000 | 0.53520000  |
| C  | -4.59520000  | 13.04640000 | -1.40900000  | O | 9.55760000  | 2.80690000  | -0.25410000 |
| C  | -1.29470000  | 10.33130000 | -1.97800000  | O | -0.81300000 | -9.83550000 | -0.63770000 |
| C  | -1.04440000  | 3.84460000  | -9.65750000  | O | 2.73100000  | -9.45740000 | -0.77700000 |
| C  | -13.60900000 | 1.96440000  | -1.80530000  | O | 0.86940000  | 9.86870000  | 0.87100000  |
| C  | -10.35650000 | 1.99190000  | 1.02640000   | O | -2.66730000 | 9.48860000  | 1.14060000  |
| C  | -3.96410000  | 9.78340000  | 1.32660000   | O | 9.61550000  | 1.26480000  | -2.19870000 |
| C  | -4.26010000  | 3.68040000  | -12.48930000 | O | 9.80780000  | 0.87450000  | 1.34190000  |
| C  | -4.56380000  | 0.19520000  | -8.66690000  | O | -9.51980000 | -1.12070000 | 2.49490000  |
| C  | -9.28220000  | -0.57990000 | -3.37530000  | O | -9.74340000 | -0.85300000 | -1.04390000 |
| C  | -1.33770000  | 9.35660000  | -3.09560000  | O | 0.48560000  | 0.99670000  | 10.03000000 |
| C  | -1.13460000  | 4.75940000  | -8.51860000  | O | 0.77950000  | -2.53120000 | 9.73550000  |
| C  | -9.42040000  | 3.13650000  | 1.05760000   | O | -0.29180000 | -0.95110000 | -9.72100000 |

|    |              |              |              |    |              |             |              |
|----|--------------|--------------|--------------|----|--------------|-------------|--------------|
| O  | -0.89360000  | 2.54930000   | -9.34520000  | O  | -13.57180000 | 2.29980000  | -0.50690000  |
| O  | 12.14690000  | -0.11290000  | 0.54430000   | O  | -4.52190000  | 10.99110000 | 1.51980000   |
| O  | 2.13970000   | -2.07060000  | 11.95260000  | O  | -4.89760000  | 14.54660000 | 1.81310000   |
| O  | 2.39050000   | -11.86240000 | 0.39730000   | O  | -15.21750000 | 1.95830000  | 1.38280000   |
| O  | -12.08920000 | 0.11780000   | -0.25020000  | O  | -11.66000000 | 2.30070000  | 1.13370000   |
| O  | -2.11990000  | 2.04800000   | -11.59080000 | O  | -4.91110000  | 12.89830000 | -0.11350000  |
| O  | -2.47870000  | 11.89370000  | 0.10660000   | O  | -4.52760000  | 12.63890000 | 3.43410000   |
| Zr | -1.01930000  | 10.85950000  | 1.11000000   | O  | -2.21490000  | 11.70290000 | 2.54830000   |
| Zr | 1.08250000   | -10.82650000 | -0.79400000  | O  | -11.92430000 | -0.11090000 | 2.19870000   |
| Zr | -10.81760000 | -1.11090000  | 0.79090000   | O  | -0.49520000  | 0.18920000  | 12.31750000  |
| Zr | 10.89810000  | 1.15000000   | -0.48310000  | Zr | -13.33160000 | 0.95700000  | 1.15250000   |
| Zr | -0.65240000  | 0.91670000   | -10.71220000 | Zr | -3.54350000  | 12.90180000 | 1.54300000   |
| Zr | 0.74430000   | -0.85930000  | 11.06680000  | O  | -14.53620000 | -0.12900000 | -0.10530000  |
| C  | -9.68400000  | -0.02170000  | -4.59890000  | C  | 16.06950000  | 1.99890000  | -3.73730000  |
| C  | -8.77740000  | 0.12320000   | -5.65380000  | C  | 12.75450000  | 4.72580000  | -3.24040000  |
| C  | -5.78260000  | -0.45870000  | -8.90410000  | C  | 15.96770000  | 4.66000000  | -0.34570000  |
| C  | -6.72380000  | -0.61200000  | -7.88220000  | O  | 16.53250000  | 3.45510000  | -0.51540000  |
| O  | -11.55450000 | -0.82060000  | -2.64270000  | O  | 16.84230000  | -0.08840000 | -0.94400000  |
| O  | -15.12530000 | -1.19480000  | -2.45830000  | O  | 16.78230000  | 1.47660000  | 1.04710000   |
| O  | -4.03250000  | -1.15190000  | -12.97780000 | O  | 16.59220000  | 1.89170000  | -2.50650000  |
| O  | -4.53510000  | 2.37220000   | -12.60380000 | O  | 14.25090000  | 2.83250000  | -1.70700000  |
| O  | -4.41990000  | 0.77660000   | -14.57110000 | Zr | 15.50770000  | 1.57420000  | -0.67940000  |
| O  | -4.13200000  | 0.43880000   | -11.00960000 | C  | 9.10140000   | 0.95050000  | -5.76650000  |
| O  | -13.51650000 | 0.75830000   | -2.38500000  | C  | 8.07460000   | 0.97190000  | -6.71630000  |
| O  | -13.17010000 | -2.78550000  | -2.73750000  | C  | 1.96610000   | 1.85780000  | -16.21840000 |
| O  | -1.77410000  | -0.38220000  | -11.83620000 | C  | -1.48770000  | 4.41520000  | -15.72520000 |
| O  | -11.86250000 | -2.32440000  | -0.49100000  | C  | 1.76110000   | 4.58620000  | -12.89360000 |
| O  | -0.00680000  | -11.93120000 | -2.13520000  | C  | 4.75370000   | 1.97470000  | -9.52580000  |
| Zr | -3.11140000  | 0.78520000   | -12.86810000 | C  | 5.82920000   | 1.99710000  | -8.63270000  |
| Zr | -13.26910000 | -1.12380000  | -1.38020000  | O  | 14.79070000  | 1.93630000  | -4.13740000  |
| C  | 0.79990000   | 4.60850000   | 9.86660000   | O  | 11.22820000  | 1.55820000  | -3.97600000  |
| C  | 0.65160000   | 5.64300000   | 8.94040000   | O  | 2.39070000   | 3.41110000  | -13.04120000 |
| C  | -3.94030000  | 12.59540000  | 4.63930000   | O  | 2.89570000   | -0.11190000 | -13.38300000 |
| C  | -1.21490000  | 15.93920000  | 4.60140000   | O  | 2.75080000   | 1.50650000  | -11.42600000 |
| C  | -4.56930000  | 15.84560000  | 1.87690000   | O  | 2.51120000   | 1.80750000  | -14.99370000 |
| C  | -0.82220000  | 8.86390000   | 6.36300000   | O  | 12.83740000  | 3.53110000  | -3.84530000  |
| C  | -0.68240000  | 7.78250000   | 7.23520000   | O  | 13.17740000  | -0.00580000 | -4.27650000  |
| O  | -2.64400000  | 12.69840000  | 4.96860000   | O  | 14.46620000  | 0.39770000  | -2.00270000  |
| O  | 0.90070000   | 13.05180000  | 4.60900000   | O  | 0.12880000   | 2.63880000  | -14.18100000 |
| O  | 0.77780000   | 2.31240000   | 15.42660000  | Zr | 1.46740000   | 1.47490000  | -13.14650000 |
| O  | 0.55750000   | 2.58060000   | 11.85410000  | Zr | 13.07540000  | 1.62530000  | -2.88280000  |
| O  | -1.12520000  | 2.31370000   | 13.74840000  | O  | 0.68680000   | 1.71770000  | -16.59720000 |
| O  | 2.43690000   | 2.59130000   | 13.53740000  | O  | -2.85150000  | 1.18800000  | -16.38180000 |
| O  | -0.73230000  | 11.09290000  | 4.62450000   | O  | -1.33760000  | 3.21650000  | -16.30830000 |
| O  | -1.03920000  | 14.65450000  | 4.94530000   | O  | -0.82890000  | -0.30990000 | -16.67370000 |
| O  | 2.13290000   | 0.18780000   | 14.60290000  | O  | 0.47620000   | 0.21390000  | -14.42970000 |
| O  | -2.45570000  | 14.14510000  | 2.76210000   | Zr | -0.99440000  | 1.34390000  | -15.31290000 |
| Zr | 0.74240000   | 1.27120000   | 13.54850000  | C  | 4.42220000   | 9.96080000  | 0.02580000   |
| Zr | -1.00070000  | 12.97070000  | 3.61250000   | C  | 5.52790000   | 9.11110000  | -0.07960000  |
| C  | -6.12870000  | 8.71750000   | 1.97600000   | C  | 1.44020000   | 13.70180000 | -2.01790000  |
| C  | -7.03950000  | 7.65830000   | 1.92700000   | C  | -1.87640000  | 16.40270000 | -1.45120000  |
| C  | -9.86800000  | 4.42430000   | 0.72080000   | C  | 1.46890000   | 16.49960000 | 1.27470000   |
| C  | -9.00590000  | 5.52270000   | 0.78230000   | C  | 8.93440000   | 6.30320000  | 0.62110000   |
| O  | -13.30330000 | 1.97090000   | 3.04620000   | C  | 7.87560000   | 7.21150000  | 0.72530000   |

|    |              |              |              |   |                                      |
|----|--------------|--------------|--------------|---|--------------------------------------|
| O  | 12.99040000  | 4.62170000   | 1.61610000   | H | -0.56340000 -2.27590000 -17.18440000 |
| O  | 12.79100000  | 5.03410000   | -1.93520000  | H | -4.04830000 -3.19190000 -13.16410000 |
| O  | 2.04560000   | 15.29860000  | 1.11960000   | H | 4.42970000 3.05460000 13.43480000    |
| O  | 2.38540000   | 11.74830000  | 0.79380000   | H | -13.73330000 2.79270000 -2.48880000  |
| O  | 11.10860000  | 4.64970000   | -0.07210000  | H | -5.12190000 4.31910000 -12.35480000  |
| O  | 14.67360000  | 4.99590000   | -0.23730000  | H | -1.20510000 16.63900000 5.42530000   |
| O  | 2.41380000   | 13.38080000  | 2.73510000   | H | -5.40100000 16.52160000 2.01810000   |
| O  | 2.02730000   | 13.66420000  | -0.81220000  | H | 16.78910000 2.16020000 -4.52780000   |
| O  | 14.38250000  | 2.54850000   | 0.73640000   | H | 12.64000000 5.56920000 -3.90690000   |
| O  | -0.28590000  | 14.59570000  | 0.07410000   | H | 16.66180000 5.48670000 -0.28720000   |
| Zr | 12.99780000  | 3.65420000   | -0.30180000  | H | 2.66470000 2.03900000 -17.02330000   |
| Zr | 1.04490000   | 13.39870000  | 1.07970000   | H | -1.65630000 5.23770000 -16.40620000  |
| C  | -0.19080000  | 5.77920000   | -8.36420000  | H | -2.03340000 17.21860000 -2.14280000  |
| C  | -0.27420000  | 6.65150000   | -7.27910000  | H | 2.14990000 17.33910000 1.26600000    |
| C  | -1.27190000  | 9.79360000   | -4.42940000  | H | 13.72750000 -2.85640000 2.74260000   |
| C  | -1.29020000  | 8.87360000   | -5.47890000  | H | 13.05660000 4.68900000 3.66250000    |
| O  | 0.14420000   | 13.59510000  | -2.34720000  | H | -13.18560000 2.09000000 5.08790000   |
| O  | -3.39810000  | 13.22300000  | -1.98820000  | H | -2.61050000 -5.12600000 13.27440000  |
| O  | -1.12320000  | 4.41460000   | -10.87090000 | H | 4.97770000 -1.04120000 16.89960000   |
| O  | -1.46020000  | 4.74970000   | -14.42640000 | H | 2.93800000 13.24090000 4.71050000    |
| O  | -3.07950000  | 4.31750000   | -12.51490000 | H | -4.61480000 12.45720000 5.47270000   |
| O  | 0.45140000   | 4.85130000   | -12.77650000 | H | 2.11470000 13.83900000 -2.85150000   |
| O  | -1.80000000  | 15.18760000  | -2.01430000  | H | 5.20130000 -12.46580000 -4.63990000  |
| O  | -1.46410000  | 11.62460000  | -2.30690000  | H | -2.57180000 -13.75160000 2.73510000  |
| O  | -0.03850000  | 12.15390000  | -0.14300000  | H | -13.00360000 -4.76440000 -3.24040000 |
| O  | 0.31200000   | 2.41340000   | -11.73310000 | H | 3.48630000 -2.06090000 -13.60410000  |
| O  | 11.80480000  | 2.60800000   | -1.60430000  | H | 13.32960000 -1.97440000 -4.82240000  |
| Zr | -1.14670000  | 3.41600000   | -12.77250000 | H | -5.43390000 13.01910000 -2.09060000  |
| Zr | -1.49850000  | 13.32390000  | -0.99020000  | H | 5.01910000 -12.99330000 2.96930000   |
| O  | -2.30190000  | 2.27370000   | -14.03040000 | H | -2.38980000 -13.21390000 -4.87360000 |
| O  | -1.40090000  | 16.48850000  | 3.39160000   | H | 2.40790000 5.45200000 -12.86650000   |
| O  | -1.78780000  | 16.76070000  | -0.16120000  | H | 1.62520000 -7.99810000 8.10380000    |
| O  | -3.36680000  | 16.43410000  | 1.79260000   | H | -0.21030000 -8.92800000 6.55800000   |
| O  | 0.17620000   | 16.81830000  | 1.43850000   | O | -6.65680000 -9.18070000 -1.86000000  |
| O  | -0.02090000  | 14.40690000  | 2.51690000   | O | -7.97980000 -8.61780000 0.56540000   |
| Zr | -1.47790000  | 15.44980000  | 1.51260000   | H | -7.86580000 -2.39960000 7.82820000   |
| O  | -2.72030000  | 14.33110000  | 0.31940000   | H | -6.77640000 -0.52360000 9.21370000   |
| H  | 1.61280000   | -17.17000000 | 2.59560000   | O | 8.47900000 -7.91500000 0.22650000    |
| H  | 5.49730000   | -16.52330000 | -1.09490000  | O | 9.36550000 -6.55430000 -2.07310000   |
| H  | 1.78570000   | -16.63150000 | -5.01850000  | H | 0.05260000 -6.69750000 -9.20820000   |
| H  | -2.09390000  | -17.28160000 | -1.32420000  | H | 1.73050000 -7.80120000 -7.90520000   |
| H  | 1.45750000   | -5.12720000  | 16.83170000  | O | -9.21170000 0.76050000 -6.81760000   |
| H  | 4.98380000   | -4.52650000  | 12.77370000  | O | -7.88880000 -1.33030000 -8.15310000  |
| H  | -12.49330000 | -5.47390000  | 4.33800000   | O | 4.94460000 -1.41140000 5.43420000    |
| H  | -17.15790000 | -1.36810000  | -2.64490000  | H | 4.30150000 0.51200000 -5.96610000    |
| H  | -16.54820000 | -5.49860000  | 0.77440000   | O | -1.58250000 5.69180000 -3.58240000   |
| H  | -2.61620000  | -1.63270000  | 17.39660000  | O | 0.73320000 5.24050000 4.92180000     |
| H  | 0.89840000   | 2.45810000   | 17.46630000  | H | -6.17760000 3.88540000 1.77800000    |
| H  | -3.16240000  | 2.46160000   | 13.90550000  | H | 5.42480000 5.28760000 -0.67600000    |
| H  | -16.64170000 | -2.06850000  | 4.94200000   | H | 4.15020000 6.31560000 1.31760000     |
| H  | -17.25780000 | 2.06190000   | 1.53280000   | H | -5.20950000 5.50630000 0.00600000    |
| H  | 17.19400000  | 1.27400000   | 3.04370000   | H | 5.63500000 2.38350000 -4.78520000    |
| H  | 17.32220000  | -2.06340000  | -1.20030000  | O | 5.69970000 1.03040000 4.23960000     |
| H  | -4.87410000  | 0.91830000   | -16.56350000 | O | -1.32360000 3.90540000 6.31520000    |

|   |              |              |              |              |              |             |              |
|---|--------------|--------------|--------------|--------------|--------------|-------------|--------------|
| O | -3.42430000  | 5.44940000   | -5.71010000  | H            | 0.63380000   | -4.71590000 | -0.99990000  |
| P | -3.08290000  | 5.01800000   | -4.08220000  | C            | -2.13760000  | -3.82220000 | 1.54190000   |
| O | -3.02630000  | 3.33330000   | -3.94770000  | H            | -2.09440000  | -1.85340000 | 0.70920000   |
| O | -4.18470000  | 5.54360000   | -3.19050000  | C            | -1.62690000  | -5.11770000 | 1.51550000   |
| P | 8.29160000   | 1.51430000   | -9.24040000  | H            | -0.22830000  | -6.44410000 | 0.53820000   |
| O | 8.08400000   | 0.69570000   | -10.70640000 | H            | -2.93220000  | -3.56550000 | 2.23740000   |
| O | 9.60640000   | 2.25970000   | -9.26510000  | H            | -1.99900000  | -5.87010000 | 2.20480000   |
| H | 7.75430000   | 1.38510000   | -11.33640000 | C            | -3.32490000  | -1.62350000 | -2.29540000  |
| P | -0.13800000  | -3.94410000  | -4.57440000  | C            | -3.86210000  | -0.62460000 | -1.56130000  |
| O | -1.30750000  | -3.00760000  | -4.77210000  | C            | -1.64930000  | -0.03750000 | -2.69720000  |
| O | 0.66970000   | -3.88270000  | -3.30650000  | N            | -2.17330000  | -1.29330000 | -2.96710000  |
| P | -9.27180000  | -0.31370000  | -8.15560000  | H            | -1.73660000  | -1.97080000 | -3.65750000  |
| O | -10.51870000 | -1.16310000  | -8.06290000  | H            | -3.71120000  | -2.62880000 | -2.40500000  |
| O | -9.30990000  | 0.58480000   | -9.58870000  | H            | -4.75730000  | -0.65130000 | -0.95720000  |
| H | -9.01300000  | -0.04720000  | -10.29110000 | S            | -2.91310000  | 0.84870000  | -1.72070000  |
| P | -9.59590000  | 7.88780000   | 1.65300000   | C            | -0.99000000  | 0.73970000  | -3.80510000  |
| O | -10.84120000 | 7.60010000   | 2.46010000   | C            | -0.30460000  | 1.92790000  | -3.51010000  |
| O | -9.68630000  | 9.45500000   | 1.02200000   | C            | -1.08030000  | 0.31330000  | -5.13800000  |
| H | -9.41890000  | 10.04490000  | 1.77130000   | C            | 0.25560000   | 2.69350000  | -4.53050000  |
| P | -7.94210000  | -9.63770000  | -0.81660000  | H            | -0.21710000  | 2.26170000  | -2.47920000  |
| P | 9.67170000   | -7.86600000  | -1.00770000  | C            | -0.49910000  | 1.07530000  | -6.15280000  |
| P | 7.98950000   | 9.77030000   | 0.34140000   | H            | -1.58990000  | -0.61150000 | -5.38470000  |
| O | -9.25360000  | -9.52400000  | -1.55960000  | C            | 0.16030000   | 2.26820000  | -5.85750000  |
| O | -7.71880000  | -11.23860000 | -0.31720000  | H            | 0.76920000   | 3.61970000  | -4.28890000  |
| O | 11.03570000  | -7.69460000  | -0.37920000  | H            | -0.57370000  | 0.73240000  | -7.18060000  |
| O | 9.63610000   | -9.31270000  | -1.88400000  | H            | 0.60070000   | 2.86160000  | -6.65420000  |
| O | 7.76650000   | 11.17190000  | 1.26230000   | H            | 0.43550000   | -2.73150000 | -1.90140000  |
| O | 9.26920000   | 9.89230000   | -0.45380000  | H            | -0.63480000  | -0.26370000 | -1.84980000  |
| H | 9.48440000   | -10.01650000 | -1.20390000  | C            | -0.08810000  | -0.18230000 | 0.30220000   |
| H | 7.39180000   | 11.83400000  | 0.62820000   | C            | 1.02050000   | -9.86050000 | -3.78320000  |
| H | -7.38560000  | -11.71020000 | -1.12190000  | C            | -0.15040000  | -2.16420000 | -10.28120000 |
| P | -3.97400000  | -0.58340000  | 4.77200000   | H            | 0.20750000   | 0.86620000  | 0.26840000   |
| O | -2.62910000  | 0.42940000   | 4.94370000   | H            | -1.16650000  | -0.18840000 | 0.45310000   |
| O | -3.99380000  | -1.15570000  | 3.37300000   | H            | 0.38530000   | -0.65480000 | 1.17140000   |
| H | -2.85160000  | 1.23780000   | 4.41650000   | C            | 1.61720000   | -0.46200000 | -1.61860000  |
| P | -0.38270000  | 3.93460000   | 4.87890000   | C            | 2.41980000   | 0.53200000  | -1.02850000  |
| O | 0.46460000   | 2.47780000   | 4.73460000   | C            | 2.09260000   | -1.08050000 | -2.79020000  |
| O | -1.29820000  | 4.09650000   | 3.68720000   | C            | 3.65750000   | 0.87580000  | -1.57300000  |
| H | 1.05750000   | 2.45280000   | 5.52740000   | H            | 2.11260000   | 1.02660000  | -0.11490000  |
| P | 1.57330000   | -4.52090000  | 4.22750000   | C            | 3.32760000   | -0.73260000 | -3.33060000  |
| O | 2.58010000   | -3.28610000  | 4.79640000   | H            | 1.52820000   | -1.86720000 | -3.27760000  |
| O | 1.11020000   | -4.17180000  | 2.83350000   | C            | 4.12020000   | 0.24270000  | -2.72470000  |
| H | 3.00630000   | -3.66040000  | 5.60830000   | H            | 4.26390000   | 1.63250000  | -1.08190000  |
| P | 4.59990000   | -0.28850000  | 4.18110000   | H            | 3.67060000   | -1.24310000 | -4.22580000  |
| O | 4.72030000   | -0.98250000  | 2.84370000   | H            | 5.09160000   | 0.49540000  | -3.13720000  |
| O | 3.02110000   | 0.28970000   | 4.36600000   |              |              |             |              |
| H | 3.01590000   | 0.72470000   | 5.25560000   | On MOF-bct   |              |             |              |
| H | -2.94780000  | 3.00250000   | -4.87780000  | (Z)-syn-TS-R |              |             |              |
| C | 0.30850000   | -0.88550000  | -0.98380000  | O            | -13.66970000 | 10.14630000 | -3.80170000  |
| N | 0.02390000   | -2.23160000  | -1.09760000  | O            | -12.86400000 | 8.76690000  | -1.97480000  |
| C | -0.60830000  | -3.13950000  | -0.21420000  | C            | -12.99510000 | 9.09530000  | -3.27720000  |
| C | -0.13150000  | -4.46640000  | -0.27290000  | C            | -12.38220000 | 8.14830000  | -4.24020000  |
| C | -1.64690000  | -2.83620000  | 0.68190000   | C            | -11.46890000 | 7.17850000  | -3.79050000  |
| C | -0.63320000  | -5.43680000  | 0.58530000   | C            | -10.94930000 | 6.22010000  | -4.66420000  |



|   |              |              |             |   |             |              |              |
|---|--------------|--------------|-------------|---|-------------|--------------|--------------|
| C | -12.18450000 | 7.23750000   | -6.48920000 | O | 16.11860000 | -10.06700000 | 3.94090000   |
| O | -10.02180000 | 5.30130000   | -4.17020000 | O | 16.88940000 | -8.60390000  | 2.14380000   |
| C | -11.30960000 | 6.24080000   | -6.02780000 | C | 16.74490000 | -8.98490000  | 3.42890000   |
| C | -12.72030000 | 8.17880000   | -5.60440000 | O | -6.14890000 | 3.71790000   | 10.70620000  |
| O | -12.88940000 | -13.96100000 | -2.83280000 | O | -5.31930000 | 1.93310000   | 9.28510000   |
| O | -12.07510000 | -15.35740000 | -1.00190000 | C | -5.48450000 | 3.22650000   | 9.63210000   |
| C | -12.21500000 | -15.00070000 | -2.29440000 | C | -4.93710000 | 4.21230000   | 8.66980000   |
| O | 0.92790000   | 10.67330000  | -3.82890000 | C | -3.98700000 | 3.80620000   | 7.71620000   |
| O | 1.72710000   | 9.24850000   | -2.03420000 | C | -3.54310000 | 4.68380000   | 6.72450000   |
| C | 2.16880000   | 8.66200000   | -4.32150000 | C | -4.93020000 | 6.43420000   | 7.67560000   |
| C | 2.79600000   | 7.48130000   | -3.89950000 | O | -2.58840000 | 4.23240000   | 5.81180000   |
| C | 3.26860000   | 6.55420000   | -4.82170000 | C | -4.01880000 | 6.01070000   | 6.69370000   |
| C | 2.54050000   | 7.95650000   | -6.62000000 | C | -5.39030000 | 5.54250000   | 8.65130000   |
| O | 3.92480000   | 5.42680000   | -4.35020000 | O | -6.20580000 | 2.74170000   | -13.57470000 |
| C | 3.13690000   | 6.75820000   | -6.20400000 | O | -5.36970000 | 0.99300000   | -15.06130000 |
| C | 2.06120000   | 8.89130000   | -5.70400000 | C | -5.55930000 | 2.26660000   | -14.66200000 |
| O | 1.64930000   | -13.44410000 | -2.83970000 | O | 8.33580000  | 4.14810000   | 10.64250000  |
| O | 2.50500000   | -14.84200000 | -1.02940000 | O | 9.10100000  | 2.35710000   | 9.19550000   |
| C | 2.34330000   | -14.47900000 | -2.31740000 | C | 8.93030000  | 3.65480000   | 9.53060000   |
| O | 15.46430000  | 11.02750000  | -3.81960000 | C | 9.38080000  | 4.64910000   | 8.52420000   |
| O | 16.27080000  | 9.60170000   | -2.00830000 | C | 9.85130000  | 4.22190000   | 7.26970000   |
| C | 16.12650000  | 9.97260000   | -3.29630000 | C | 10.22110000 | 5.14390000   | 6.28760000   |
| O | 16.24490000  | -13.01570000 | -2.78070000 | C | 9.72280000  | 6.95680000   | 7.82220000   |
| O | 17.05280000  | -14.44490000 | -0.97300000 | O | 10.70570000 | 4.66070000   | 5.07090000   |
| C | 16.91340000  | -14.06770000 | -2.25960000 | C | 10.17350000 | 6.52630000   | 6.56440000   |
| O | -13.74040000 | 13.21790000  | 2.85700000  | C | 9.31860000  | 6.02950000   | 8.78800000   |
| O | -12.99230000 | 14.65410000  | 1.02860000  | O | 8.47550000  | 3.13160000   | -13.50710000 |
| C | -13.12040000 | 14.29200000  | 2.32080000  | O | 9.35760000  | 1.36840000   | -14.94860000 |
| O | -13.02490000 | -10.89790000 | 3.83010000  | C | 9.16700000  | 2.64550000   | -14.56110000 |
| O | -12.28570000 | -9.47530000  | 2.00850000  | O | -6.05050000 | -3.02650000  | 13.61490000  |
| C | -12.40670000 | -9.81050000  | 3.31010000  | O | -5.32430000 | -1.22550000  | 15.09690000  |
| C | -11.85560000 | -8.82900000  | 4.27710000  | C | -5.43160000 | -2.50910000  | 14.69900000  |
| C | -11.01210000 | -7.79660000  | 3.82990000  | O | -5.84280000 | -3.99020000  | -10.66980000 |
| C | -10.55860000 | -6.80770000  | 4.70660000  | O | -5.14710000 | -2.15670000  | -9.24150000  |
| C | -11.71570000 | -7.91500000  | 6.52980000  | C | -5.22260000 | -3.45840000  | -9.58850000  |
| O | -9.70490000  | -5.81980000  | 4.21380000  | C | -4.62640000 | -4.41040000  | -8.61850000  |
| C | -10.91410000 | -6.85750000  | 6.07030000  | C | -3.84490000 | -3.93040000  | -7.55120000  |
| C | -12.18710000 | -8.88800000  | 5.64220000  | C | -3.37120000 | -4.79420000  | -6.56130000  |
| O | 0.81300000   | 13.57890000  | 2.89990000  | C | -4.37020000 | -6.66670000  | -7.73920000  |
| O | 1.54740000   | 15.06660000  | 1.10720000  | O | -2.60500000 | -4.26440000  | -5.52130000  |
| C | 1.42190000   | 14.67220000  | 2.39020000  | C | -3.63310000 | -6.17640000  | -6.64920000  |
| O | 1.56000000   | -10.43170000 | 3.84940000  | C | -4.87050000 | -5.79220000  | -8.70990000  |
| O | 2.24810000   | -8.97400000  | 2.03500000  | O | 8.59370000  | -2.55050000  | 13.63860000  |
| C | 2.12760000   | -9.31420000  | 3.33730000  | O | 9.35380000  | -0.71880000  | 15.06440000  |
| C | 2.60500000   | -8.31040000  | 4.32230000  | C | 9.24420000  | -2.00990000  | 14.69220000  |
| C | 2.99220000   | -7.02560000  | 3.90010000  | O | 8.60370000  | -3.60150000  | -10.60020000 |
| C | 3.37440000   | -6.04900000  | 4.82540000  | O | 9.26960000  | -1.78960000  | -9.12960000  |
| C | 3.06500000   | -7.65200000  | 6.62220000  | C | 9.18600000  | -3.08820000  | -9.49060000  |
| O | 3.77760000   | -4.80000000  | 4.34710000  | C | 9.74630000  | -4.06640000  | -8.52510000  |
| C | 3.42470000   | -6.36280000  | 6.20120000  | C | 9.50710000  | -5.44530000  | -8.67130000  |
| C | 2.64840000   | -8.61180000  | 5.69560000  | C | 10.02080000 | -6.36650000  | -7.74920000  |
| O | 15.39770000  | 14.00150000  | 2.89400000  | C | 11.00010000 | -4.53490000  | -6.49370000  |
| O | 16.16570000  | 15.45500000  | 1.08790000  | O | 9.68180000  | -7.71330000  | -7.89140000  |
| C | 16.02850000  | 15.07750000  | 2.37480000  | C | 10.75750000 | -5.90920000  | -6.63650000  |

C 10.50570000 -3.62510000 -7.42750000  
 O -16.30020000 12.74620000 -3.96580000  
 O -17.12680000 14.34740000 -2.31740000  
 C -16.97570000 13.84310000 -3.55840000  
 O -15.51940000 -11.37510000 -3.00840000  
 O -16.36880000 -9.78230000 -1.36340000  
 C -16.20210000 -10.28140000 -2.60460000  
 O -1.74210000 13.23480000 -3.93880000  
 O -2.58310000 14.79270000 -2.25620000  
 C -2.42860000 14.31580000 -3.50770000  
 O -0.99260000 -10.85610000 -2.95370000  
 O -1.80170000 -9.29680000 -1.27970000  
 C -1.65060000 -9.74520000 -2.54430000  
 C -2.20370000 -8.86910000 -3.60700000  
 C -3.00300000 -7.76380000 -3.26520000  
 C -3.45500000 -6.87330000 -4.24170000  
 C -2.38460000 -8.22620000 -5.94930000  
 O -4.26200000 -5.80450000 -3.84630000  
 C -3.15050000 -7.10310000 -5.59960000  
 C -1.90760000 -9.09580000 -4.96320000  
 O 12.86120000 13.64480000 -3.94580000  
 O 12.04400000 15.23390000 -2.28040000  
 C 12.19440000 14.74290000 -3.52690000  
 O 13.61470000 -10.41690000 -2.89880000  
 O 12.80360000 -8.84560000 -1.23760000  
 C 12.94370000 -9.31150000 -2.49720000  
 C 12.33870000 -8.48120000 -3.56920000  
 C 12.59860000 -8.75250000 -4.92530000  
 C 12.04430000 -7.95820000 -5.93720000  
 C 10.97770000 -6.58150000 -4.24730000  
 O 12.39840000 -8.22060000 -7.26170000  
 C 11.24860000 -6.84440000 -5.59850000  
 C 11.50970000 -7.39280000 -3.24490000  
 O -16.22470000 10.49110000 3.02220000  
 O -16.97610000 8.85200000 1.37500000  
 C -16.84390000 9.36100000 2.61630000  
 O -15.50820000 -13.64100000 3.97680000  
 O -16.23650000 -15.28280000 2.32200000  
 C -16.12010000 -14.77280000 3.56440000  
 O -1.64310000 10.81650000 2.98890000  
 O -2.34170000 9.21830000 1.30200000  
 C -2.22170000 9.66570000 2.57100000  
 C -2.71740000 8.75000000 3.63070000  
 C -3.28090000 7.50810000 3.28690000  
 C -3.68400000 6.60270000 4.27190000  
 C -3.04090000 8.19970000 5.98240000  
 O -4.26070000 5.39640000 3.87020000  
 C -3.57330000 6.94830000 5.63550000  
 C -2.60750000 9.08730000 4.99220000  
 O -0.88800000 -13.19940000 4.00360000  
 O -1.62540000 -14.83460000 2.34570000  
 C -1.49710000 -14.33260000 3.59030000  
 O 12.88330000 11.28420000 2.99910000  
 O 12.13460000 9.69670000 1.32100000

C 12.24460000 10.16510000 2.58120000  
 C 11.65160000 9.30430000 3.62870000  
 C 10.63470000 8.39390000 3.29480000  
 C 10.13730000 7.49480000 4.24160000  
 C 11.61370000 8.46110000 5.90940000  
 O 9.10190000 6.63640000 3.86770000  
 C 10.63730000 7.51310000 5.56060000  
 C 12.11810000 9.34770000 4.95260000  
 O 13.62940000 -12.79070000 4.03180000  
 O 12.88660000 -14.40030000 2.35210000  
 C 13.00770000 -13.91070000 3.60210000  
 O -8.54690000 -3.15490000 10.88830000  
 O -9.30590000 -1.47240000 9.31280000  
 C -9.14960000 -2.74170000 9.74810000  
 C -9.63090000 -3.80400000 8.82840000  
 C -10.31010000 -3.46080000 7.64580000  
 C -10.70480000 -4.44070000 6.73180000  
 C -9.81370000 -6.15200000 8.20380000  
 O -11.40040000 -4.04240000 5.58900000  
 C -10.46560000 -5.80270000 7.01050000  
 C -9.39130000 -5.16370000 9.09900000  
 O -8.43860000 -4.20950000 -13.30650000  
 O -9.33780000 -2.55900000 -14.86660000  
 C -9.12910000 -3.80470000 -14.39520000  
 O 6.01040000 -2.74590000 10.99680000  
 O 5.14920000 -1.09000000 9.44200000  
 C 5.33200000 -2.34830000 9.89390000  
 C 4.78610000 -3.41350000 9.02510000  
 C 3.71860000 -3.12870000 8.15790000  
 C 3.26630000 -4.08080000 7.24130000  
 C 4.89860000 -5.65970000 8.09860000  
 O 2.18470000 -3.75940000 6.42090000  
 C 3.86620000 -5.35560000 7.19510000  
 C 5.35620000 -4.69710000 9.00500000  
 O 6.12400000 -3.78210000 -13.33850000  
 O 5.32420000 -2.12310000 -14.94280000  
 C 5.49160000 -3.37030000 -14.45920000  
 O -8.73820000 3.76150000 13.35630000  
 O -9.52030000 2.05480000 14.91900000  
 C -9.39620000 3.31170000 14.44740000  
 O -8.69900000 2.70370000 -10.84240000  
 O -9.33610000 0.97610000 -9.26200000  
 C -9.26900000 2.25210000 -9.70000000  
 C -9.82140000 3.27980000 -8.78190000  
 C -10.47010000 2.89240000 -7.59600000  
 C -10.93100000 3.84440000 -6.68390000  
 C -10.16920000 5.61040000 -8.16350000  
 O -11.58850000 3.40190000 -5.53510000  
 C -10.78960000 5.21880000 -6.96670000  
 C -9.68140000 4.65220000 -9.05780000  
 O 5.82900000 4.20550000 13.35980000  
 O 5.11920000 2.51970000 14.97870000  
 C 5.21340000 3.76890000 14.48070000  
 O 5.84390000 3.12600000 -10.90690000

|   |             |             |            |   |             |             |             |
|---|-------------|-------------|------------|---|-------------|-------------|-------------|
| O | 5.1040000   | 1.4190000   | -9.3483000 | C | -3.4198000  | 6.4464000   | -6.1953000  |
| C | 4.6161000   | 3.7379000   | -8.9226000 | C | -2.7690000  | 8.7370000   | -5.6837000  |
| C | 3.8491000   | 3.3920000   | -7.7997000 | O | -0.9179000  | -13.5373000 | -2.8252000  |
| C | 3.3543000   | 4.3711000   | -6.9410000 | O | -1.6373000  | -15.0021000 | -1.0081000  |
| C | 4.3569000   | 6.0741000   | -8.2971000 | C | -1.5213000  | -14.6248000 | -2.2971000  |
| O | 2.5302000   | 3.9821000   | -5.8957000 | O | 12.9098000  | 10.9717000  | -3.8159000  |
| C | 3.6149000   | 5.7352000   | -7.1582000 | O | 12.1414000  | 9.5464000   | -2.0058000  |
| C | 4.8486000   | 5.1026000   | -9.1658000 | C | 12.2641000  | 9.8973000   | -3.3024000  |
| O | -16.2992000 | 13.1511000  | 2.8632000  | C | 11.6761000  | 8.9471000   | -4.2717000  |
| O | -17.1263000 | 14.5461000  | 1.0373000  | C | 10.6287000  | 8.0989000   | -3.8747000  |
| C | -16.9748000 | 14.1921000  | 2.3292000  | C | 10.1285000  | 7.1229000   | -4.7409000  |
| O | -15.5808000 | -10.9805000 | 3.8233000  | C | 11.6712000  | 7.8793000   | -6.4563000  |
| O | -16.3979000 | -9.5878000  | 1.9911000  | O | 9.0561000   | 6.3378000   | -4.3154000  |
| C | -16.2541000 | -9.9406000  | 3.2843000  | C | 10.6602000  | 6.9963000   | -6.0413000  |
| O | -1.7525000  | 13.4876000  | 2.8960000  | C | 12.1755000  | 8.8456000   | -5.5801000  |
| O | -2.5893000  | 14.9160000  | 1.1001000  | O | 13.6873000  | -13.0783000 | -2.7980000  |
| C | -2.4385000  | 14.5330000  | 2.3838000  | O | 12.9166000  | -14.5423000 | -1.0016000  |
| O | -0.9806000  | -10.5279000 | 3.8663000  | C | 13.0584000  | -14.1591000 | -2.2861000  |
| O | -1.7990000  | -9.1379000  | 2.0546000  | O | -8.6181000  | -3.0758000  | 13.5678000  |
| C | -1.6480000  | -9.4657000  | 3.3557000  | O | -9.4602000  | -1.3046000  | 15.0238000  |
| C | -2.2207000  | -8.5047000  | 4.3334000  | C | -9.2918000  | -2.5831000  | 14.6303000  |
| C | -2.9018000  | -7.3599000  | 3.8820000  | O | -8.3723000  | -4.1183000  | -10.6349000 |
| C | -3.3774000  | -6.4034000  | 4.7819000  | O | -9.1969000  | -2.3694000  | -9.1664000  |
| C | -2.5753000  | -7.7600000  | 6.6267000  | C | -9.0027000  | -3.6563000  | -9.5294000  |
| O | -4.0536000  | -5.2918000  | 4.2768000  | C | -9.4889000  | -4.6803000  | -8.5725000  |
| C | -3.2210000  | -6.6004000  | 6.1695000  | C | -9.0585000  | -6.0171000  | -8.6634000  |
| C | -2.0704000  | -8.6976000  | 5.7190000  | C | -9.5099000  | -6.9816000  | -7.7522000  |
| O | 12.8368000  | 13.9574000  | 2.8847000  | C | -10.8024000 | -5.2717000  | -6.6133000  |
| O | 12.0331000  | 15.3880000  | 1.0753000  | O | -8.9891000  | -8.2744000  | -7.8344000  |
| C | 12.1738000  | 15.0128000  | 2.3625000  | C | -10.3719000 | -6.6043000  | -6.7016000  |
| O | 13.5595000  | -10.1291000 | 3.9076000  | C | -10.3712000 | -4.3224000  | -7.5392000  |
| O | 12.7789000  | -8.7028000  | 2.1072000  | O | 6.0265000   | -2.6215000  | 13.6803000  |
| C | 12.8996000  | -9.0593000  | 3.4040000  | O | 5.2211000   | -0.8350000  | 15.1384000  |
| C | 12.2868000  | -8.1367000  | 4.3935000  | C | 5.3865000   | -2.1179000  | 14.7586000  |
| C | 12.4898000  | -8.3211000  | 5.7739000  | O | 6.0736000   | -3.6932000  | -10.6667000 |
| C | 11.9301000  | -7.4401000  | 6.7079000  | O | 5.1500000   | -1.9284000  | -9.2710000  |
| C | 10.9744000  | -6.1481000  | 4.8898000  | C | 5.3532000   | -3.2149000  | -9.6256000  |
| O | 12.2261000  | -7.6235000  | 8.0597000  | C | 4.7705000   | -4.2188000  | -8.7170000  |
| C | 11.1884000  | -6.3257000  | 6.2649000  | C | 3.5353000   | -3.9713000  | -8.1000000  |
| C | 11.5098000  | -7.0455000  | 3.9654000  | C | 3.0187000   | -4.8626000  | -7.1546000  |
| O | -16.2265000 | 10.0859000  | -3.8090000 | C | 4.9521000   | -6.2970000  | -7.4718000  |
| O | -16.9760000 | 8.6524000   | -1.9793000 | O | 1.7609000   | -4.6070000  | -6.6089000  |
| C | -16.8446000 | 9.0112000   | -3.2722000 | C | 3.7412000   | -6.0249000  | -6.8126000  |
| O | -15.4480000 | -14.0355000 | -2.8529000 | C | 5.4602000   | -5.4040000  | -8.4200000  |
| O | -16.2069000 | -15.4764000 | -1.0330000 | O | -8.6792000  | 3.6740000   | 10.6844000  |
| C | -16.0682000 | -15.1128000 | -2.3236000 | O | -9.3884000  | 1.8746000   | 9.2172000   |
| O | -1.6113000  | 10.5523000  | -3.8376000 | C | -9.2796000  | 3.1714000   | 9.5801000   |
| O | -2.3075000  | 9.0802000   | -2.0376000 | C | -9.8327000  | 4.1610000   | 8.6235000   |
| C | -2.1723000  | 9.4254000   | -3.3366000 | C | -9.5040000  | 5.5256000   | 8.7246000   |
| C | -2.6207000  | 8.4115000   | -4.3241000 | C | -10.0140000 | 6.4572000   | 7.8107000   |
| C | -2.8795000  | 7.0916000   | -3.9131000 | C | -11.1650000 | 4.6625000   | 6.6517000   |
| C | -3.2485000  | 6.1088000   | -4.8361000 | O | -9.5958000  | 7.7853000   | 7.9036000   |
| C | -3.1786000  | 7.7677000   | -6.6062000 | C | -10.8343000 | 6.0224000   | 6.7498000   |
| O | -3.5136000  | 4.8208000   | -4.3670000 | C | -10.6752000 | 3.7435000   | 7.5791000   |

|   |              |              |              |   |              |              |              |
|---|--------------|--------------|--------------|---|--------------|--------------|--------------|
| O | -8.77090000  | 2.62060000   | -13.51990000 | C | -11.79080000 | -9.28290000  | -3.64550000  |
| O | -9.50060000  | 0.79710000   | -14.97200000 | C | -11.93060000 | -9.62190000  | -5.00430000  |
| C | -9.41510000  | 2.08410000   | -14.57950000 | C | -11.41800000 | -8.79040000  | -6.01000000  |
| O | 5.81370000   | 4.07570000   | 10.67740000  | C | -10.63900000 | -7.24420000  | -4.31040000  |
| O | 5.05430000   | 2.23660000   | 9.28410000   | O | -11.64990000 | -9.13230000  | -7.34340000  |
| C | 5.16680000   | 3.54020000   | 9.61480000   | C | -10.79530000 | -7.57310000  | -5.66450000  |
| C | 4.57120000   | 4.49150000   | 8.65100000   | C | -11.12230000 | -8.09060000  | -3.31340000  |
| C | 3.53640000   | 4.07140000   | 7.79870000   | O | 0.82210000   | 13.33980000  | -3.93620000  |
| C | 3.02880000   | 4.92190000   | 6.81290000   | O | 1.55220000   | 14.94880000  | -2.24950000  |
| C | 4.54140000   | 6.66720000   | 7.56400000   | C | 1.43040000   | 14.46570000  | -3.50230000  |
| O | 1.97030000   | 4.47030000   | 6.02220000   | O | 1.53520000   | -10.77810000 | -2.97030000  |
| C | 3.53590000   | 6.23230000   | 6.68460000   | O | 2.21030000   | -9.13390000  | -1.31590000  |
| C | 5.05740000   | 5.80440000   | 8.53620000   | C | 2.07950000   | -9.60310000  | -2.57700000  |
| O | 5.91250000   | 3.04730000   | -13.58060000 | C | 2.50880000   | -8.68980000  | -3.66190000  |
| O | 5.22040000   | 1.23280000   | -15.06190000 | C | 2.61160000   | -7.30830000  | -3.42620000  |
| C | 5.30930000   | 2.51910000   | -14.66820000 | C | 2.95390000   | -6.42760000  | -4.45730000  |
| O | -13.66480000 | 10.55090000  | 3.00360000   | C | 3.17340000   | -8.31180000  | -5.97300000  |
| O | -12.87110000 | 8.95800000   | 1.35560000   | O | 3.06820000   | -5.06800000  | -4.15990000  |
| C | -12.99940000 | 9.43830000   | 2.61040000   | C | 3.26390000   | -6.93050000  | -5.74000000  |
| C | -12.39030000 | 8.61100000   | 3.68360000   | C | 2.78350000   | -9.18090000  | -4.94970000  |
| C | -12.57330000 | 8.93360000   | 5.04120000   | O | 15.42230000  | 13.68960000  | -3.94030000  |
| C | -12.02070000 | 8.13480000   | 6.05200000   | O | 16.17800000  | 15.30170000  | -2.26870000  |
| C | -11.11360000 | 6.65210000   | 4.35830000   | C | 16.04990000  | 14.80860000  | -3.51670000  |
| O | -12.30350000 | 8.45120000   | 7.38240000   | O | 16.17510000  | -10.35330000 | -2.89460000  |
| C | -11.31210000 | 6.96350000   | 5.71110000   | O | 16.91720000  | -8.74460000  | -1.21370000  |
| C | -11.63820000 | 7.46830000   | 3.35710000   | C | 16.79360000  | -9.23180000  | -2.46460000  |
| O | -12.94850000 | -13.56530000 | 3.99320000   | O | -6.17010000  | 3.80790000   | 13.39560000  |
| O | -12.10460000 | -15.16350000 | 2.35040000   | O | -5.39080000  | 2.13230000   | 14.99290000  |
| C | -12.26630000 | -14.65980000 | 3.59030000   | C | -5.53920000  | 3.38330000   | 14.51260000  |
| O | 0.89530000   | 10.89750000  | 2.98590000   | O | -6.17050000  | 2.82490000   | -10.89380000 |
| O | 1.69890000   | 9.35250000   | 1.29670000   | O | -5.25130000  | 1.16450000   | -9.37610000  |
| C | 1.54660000   | 9.78610000   | 2.56600000   | C | -5.46160000  | 2.42400000   | -9.81120000  |
| C | 2.08980000   | 8.89460000   | 3.62160000   | C | -4.89660000  | 3.48730000   | -8.95370000  |
| C | 2.58040000   | 7.61880000   | 3.28770000   | C | -3.74840000  | 3.23020000   | -8.18700000  |
| C | 3.02280000   | 6.73760000   | 4.27750000   | C | -3.25190000  | 4.18480000   | -7.29470000  |
| C | 2.57330000   | 8.42500000   | 5.96230000   | C | -5.01790000  | 5.70850000   | -7.97250000  |
| O | 3.50290000   | 5.48570000   | 3.89070000   | O | -2.07220000  | 3.90020000   | -6.60450000  |
| C | 3.03170000   | 7.14110000   | 5.62850000   | C | -3.89500000  | 5.43550000   | -7.17180000  |
| C | 2.09500000   | 9.28860000   | 4.97170000   | C | -5.51470000  | 4.74370000   | -8.85560000  |
| O | 1.67540000   | -13.09970000 | 3.98940000   | O | 8.39750000   | 4.27910000   | 13.31720000  |
| O | 2.51250000   | -14.67560000 | 2.32230000   | O | 9.25780000   | 2.63620000   | 14.90650000  |
| C | 2.36280000   | -14.18400000 | 3.56850000   | C | 9.07520000   | 3.87820000   | 14.41520000  |
| O | 15.43870000  | 11.33920000  | 3.01680000   | O | 8.37680000   | 3.21810000   | -10.83250000 |
| O | 16.25830000  | 9.75480000   | 1.34870000   | O | 9.13200000   | 1.55360000   | -9.23630000  |
| C | 16.10450000  | 10.24130000  | 2.59660000   | C | 8.96130000   | 2.81900000   | -9.67820000  |
| O | 16.18720000  | -12.72910000 | 4.05200000   | C | 9.40040000   | 3.89370000   | -8.75300000  |
| O | 17.02450000  | -14.30400000 | 2.38430000   | C | 9.81440000   | 3.57740000   | -7.44690000  |
| C | 16.86370000  | -13.82050000 | 3.63220000   | C | 10.18100000  | 4.57950000   | -6.54500000  |
| O | -13.74050000 | 12.81220000  | -3.96810000  | C | 9.79020000   | 6.24780000   | -8.26420000  |
| O | -12.99310000 | 14.45530000  | -2.32300000  | O | 10.61730000  | 4.20100000   | -5.27380000  |
| C | -13.12090000 | 13.94250000  | -3.56310000  | C | 10.18900000  | 5.92940000   | -6.95630000  |
| O | -12.95990000 | -11.29260000 | -2.97570000  | C | 9.38800000   | 5.24300000   | -9.14970000  |
| O | -12.26410000 | -9.66170000  | -1.32080000  | O | -6.01560000  | -3.10580000  | 10.93380000  |
| C | -12.35890000 | -10.14560000 | -2.57710000  | O | -5.25240000  | -1.38940000  | 9.39700000   |

|    |              |              |              |    |              |              |              |
|----|--------------|--------------|--------------|----|--------------|--------------|--------------|
| C  | -5.36660000  | -2.66230000  | 9.83030000   | Zr | 16.55470000  | -9.95630000  | 0.51590000   |
| C  | -4.76810000  | -3.69050000  | 8.94430000   | O  | 18.67670000  | -10.27180000 | 0.54680000   |
| C  | -3.86530000  | -3.30800000  | 7.93650000   | Zr | -5.66810000  | 0.30800000   | 10.62300000  |
| C  | -3.36530000  | -4.24180000  | 7.02620000   | O  | -3.56580000  | 0.36760000   | 11.01410000  |
| C  | -4.59720000  | -5.99290000  | 8.17010000   | C  | -0.78310000  | 0.44670000   | 11.03120000  |
| O  | -2.45750000  | -3.80900000  | 6.05790000   | Zr | -5.64830000  | -0.66200000  | -13.73030000 |
| C  | -3.73120000  | -5.59940000  | 7.13650000   | O  | -3.52990000  | -0.55680000  | -13.39790000 |
| C  | -5.11730000  | -5.04730000  | 9.06130000   | C  | -0.71770000  | -0.50780000  | -13.42340000 |
| O  | -5.87400000  | -4.08580000  | -13.35810000 | Zr | 8.84740000   | 0.73850000   | 10.57240000  |
| O  | -5.21250000  | -2.36260000  | -14.95780000 | O  | 10.96690000  | 0.82820000   | 10.88230000  |
| C  | -5.27660000  | -3.62060000  | -14.47730000 | Zr | 8.99080000   | -0.27970000  | -13.63020000 |
| O  | 8.53760000   | -2.67120000  | 10.96630000  | O  | 11.09220000  | -0.20070000  | -13.19530000 |
| O  | 9.22880000   | -0.98540000  | 9.36240000   | Zr | -5.71810000  | 0.40670000   | 13.76680000  |
| C  | 9.13170000   | -2.25100000  | 9.82460000   | O  | -3.59930000  | 0.44340000   | 13.42430000  |
| C  | 9.68850000   | -3.30790000  | 8.94470000   | C  | -0.79280000  | 0.54670000   | 13.44880000  |
| C  | 9.39160000   | -4.66460000  | 9.17030000   | Zr | -5.59260000  | -0.56090000  | -10.58610000 |
| C  | 9.90220000   | -5.66220000  | 8.33000000   | O  | -3.49350000  | -0.50750000  | -10.98730000 |
| C  | 10.99220000  | -3.95300000  | 6.99520000   | C  | -0.71810000  | -0.40980000  | -11.00540000 |
| O  | 9.50890000   | -6.98400000  | 8.54720000   | Zr | 8.90260000   | 0.88770000   | 13.72090000  |
| C  | 10.69450000  | -5.30580000  | 7.21860000   | O  | 11.00940000  | 0.92730000   | 13.30760000  |
| C  | 10.49990000  | -2.96630000  | 7.84920000   | Zr | 8.89720000   | -0.17280000  | -10.47960000 |
| O  | 8.68840000   | -3.69910000  | -13.27230000 | O  | 11.02020000  | -0.10190000  | -10.77060000 |
| O  | 9.46190000   | -1.98790000  | -14.83360000 | Zr | -16.71240000 | 13.18600000  | -0.56550000  |
| C  | 9.35040000   | -3.24460000  | -14.35890000 | O  | -18.81660000 | 12.76670000  | -0.54040000  |
| Zr | -13.26980000 | 10.13180000  | -0.38390000  | Zr | -15.96910000 | -10.94650000 | 0.39060000   |
| O  | -11.16660000 | 10.53810000  | -0.40520000  | O  | -18.07180000 | -11.37330000 | 0.39710000   |
| C  | -8.36600000  | 10.60290000  | -0.42880000  | Zr | -2.15350000  | 13.59770000  | -0.53110000  |
| Zr | -12.51150000 | -14.00160000 | 0.59780000   | O  | -4.24760000  | 13.14060000  | -0.51590000  |
| O  | -10.41210000 | -13.55980000 | 0.59090000   | C  | -7.03610000  | 13.05680000  | -0.53730000  |
| C  | -7.61360000  | -13.47290000 | 0.59580000   | Zr | -1.40730000  | -10.49210000 | 0.44780000   |
| Zr | 1.32050000   | 10.57880000  | -0.41190000  | O  | -3.50440000  | -10.92110000 | 0.47030000   |
| O  | 3.41760000   | 11.01010000  | -0.41230000  | C  | -6.29730000  | -11.01190000 | 0.47010000   |
| C  | 6.20850000   | 11.09670000  | -0.41300000  | Zr | 12.44400000  | 14.04660000  | -0.54310000  |
| Zr | 2.07190000   | -13.50270000 | 0.58500000   | O  | 10.33780000  | 13.62770000  | -0.52940000  |
| O  | 4.16480000   | -13.04070000 | 0.56200000   | C  | 7.53150000   | 13.55570000  | -0.52430000  |
| C  | 6.95150000   | -12.95900000 | 0.55640000   | Zr | 13.19180000  | -10.04240000 | 0.49170000   |
| Zr | 15.86530000  | 10.94530000  | -0.38910000  | O  | 11.08730000  | -10.44500000 | 0.49080000   |
| O  | 17.97310000  | 11.34620000  | -0.39950000  | C  | 8.28480000   | -10.50670000 | 0.45880000   |
| Zr | 16.62740000  | -13.11190000 | 0.64920000   | Zr | -16.63140000 | 10.03440000  | -0.37850000  |
| O  | 18.73260000  | -12.69630000 | 0.64960000   | O  | -18.75430000 | 10.34460000  | -0.39700000  |
| Zr | -13.34590000 | 13.27460000  | -0.57120000  | Zr | -15.87740000 | -14.09790000 | 0.57360000   |
| O  | -11.22600000 | 12.94450000  | -0.55270000  | O  | -18.00130000 | -13.79530000 | 0.53750000   |
| C  | -8.43190000  | 13.01880000  | -0.53680000  | Zr | -2.03720000  | 10.45320000  | -0.41850000  |
| Zr | -12.60770000 | -10.85900000 | 0.41440000   | O  | -4.16320000  | 10.73090000  | -0.44580000  |
| O  | -10.48650000 | -11.15370000 | 0.44580000   | C  | -6.96850000  | 10.64080000  | -0.42970000  |
| C  | -7.69330000  | -11.05820000 | 0.46700000   | Zr | -1.29390000  | -13.63360000 | 0.60330000   |
| Zr | 1.21140000   | 13.72250000  | -0.52650000  | O  | -3.41840000  | -13.32830000 | 0.59480000   |
| O  | 3.33510000   | 13.41840000  | -0.51630000  | C  | -6.21710000  | -13.42660000 | 0.59880000   |
| C  | 6.13460000   | 13.51280000  | -0.52140000  | Zr | 12.50410000  | 10.90290000  | -0.39940000  |
| Zr | 1.95090000   | -10.35710000 | 0.42650000   | O  | 10.38900000  | 11.21970000  | -0.41760000  |
| O  | 4.07830000   | -10.63360000 | 0.42580000   | C  | 7.60390000   | 11.13960000  | -0.41590000  |
| C  | 6.88680000   | -10.54310000 | 0.44760000   | Zr | 13.25970000  | -13.19100000 | 0.62420000   |
| Zr | 15.81170000  | 14.10000000  | -0.53330000  | O  | 11.14080000  | -12.85410000 | 0.58930000   |
| O  | 17.93190000  | 13.77050000  | -0.51040000  | C  | 8.34720000   | -12.92260000 | 0.56740000   |

|    |              |              |              |   |              |              |              |
|----|--------------|--------------|--------------|---|--------------|--------------|--------------|
| Zr | -9.02580000  | 0.24510000   | 10.55720000  | O | 7.13000000   | 1.85520000   | 10.37240000  |
| O  | -11.14650000 | 0.20620000   | 10.86990000  | O | 7.27460000   | 0.83380000   | -13.89430000 |
| Zr | -9.01260000  | -0.82140000  | -13.65610000 | O | -7.38350000  | -0.79650000  | 13.94900000  |
| O  | -11.11640000 | -0.91140000  | -13.23650000 | O | -7.20910000  | -1.80690000  | -10.32920000 |
| Zr | 5.49030000   | 0.64410000   | 10.63930000  | O | 7.25530000   | -0.32600000  | 13.98210000  |
| O  | 3.38900000   | 0.59860000   | 11.02670000  | O | 7.24950000   | -1.39740000  | -10.30540000 |
| C  | 0.61090000   | 0.49950000   | 11.03410000  | O | -15.03390000 | 13.33660000  | -1.75380000  |
| Zr | 5.62160000   | -0.38890000  | -13.72150000 | O | -14.28100000 | -10.79040000 | -0.78310000  |
| O  | 3.49810000   | -0.44170000  | -13.39330000 | O | -0.47500000  | 13.79510000  | -1.71150000  |
| C  | 0.68080000   | -0.48260000  | -13.42340000 | O | 0.25890000   | -10.31010000 | -0.74330000  |
| Zr | -9.08580000  | 0.34280000   | 13.70640000  | O | 14.12960000  | 14.19490000  | -1.72230000  |
| O  | -11.19250000 | 0.29330000   | 13.29530000  | O | 14.87700000  | -9.86960000  | -0.68020000  |
| Zr | -8.94660000  | -0.71880000  | -10.50690000 | O | -14.94370000 | 9.97280000   | 0.80450000   |
| O  | -11.06650000 | -0.82000000  | -10.81130000 | O | -14.19970000 | -14.15760000 | 1.77120000   |
| Zr | 5.53370000   | 0.79270000   | 13.78160000  | O | -0.35540000  | 10.38120000  | 0.76530000   |
| O  | 3.41500000   | 0.70760000   | 13.43550000  | O | 0.40060000   | -13.68750000 | 1.77790000   |
| C  | 0.60460000   | 0.59980000   | 13.45170000  | O | 14.18050000  | 10.79530000  | 0.79060000   |
| Zr | 5.54160000   | -0.27990000  | -10.57460000 | O | 14.93770000  | -13.27950000 | 1.81940000   |
| O  | 3.44670000   | -0.32310000  | -10.98540000 | O | -7.32040000  | -0.90330000  | 10.44700000  |
| C  | 0.67550000   | -0.38490000  | -11.00540000 | O | -7.27740000  | -1.92250000  | -13.83140000 |
| Zr | -14.98710000 | 11.51780000  | -2.75920000  | O | 7.19870000   | -0.49160000  | 10.48100000  |
| Zr | -14.21780000 | -12.60450000 | -1.79070000  | O | 7.34840000   | -1.51480000  | -13.81150000 |
| Zr | -0.40880000  | 12.00160000  | -2.75970000  | O | -7.42650000  | 1.55660000   | 13.87480000  |
| Zr | 0.32180000   | -12.10960000 | -1.76940000  | O | -7.31970000  | 0.54060000   | -10.40190000 |
| Zr | 14.16190000  | 12.38930000  | -2.75280000  | O | 7.18710000   | 2.02340000   | 13.87240000  |
| Zr | 14.92550000  | -11.67020000 | -1.71430000  | O | 7.17710000   | 0.95230000   | -10.39090000 |
| Zr | -14.98620000 | 11.78900000  | 1.80970000   | O | -13.18740000 | 11.62940000  | -1.73910000  |
| Zr | -14.25820000 | -12.34020000 | 2.77890000   | O | -12.42740000 | -12.49790000 | -0.75460000  |
| Zr | -0.41940000  | 12.16620000  | 1.81600000   | O | 1.38870000   | 12.10730000  | -1.73340000  |
| Zr | 0.33790000   | -11.88010000 | 2.80100000   | O | 2.12690000   | -11.98830000 | -0.75780000  |
| Zr | 14.14530000  | 12.59830000  | 1.82080000   | O | 15.95920000  | 12.46700000  | -1.72160000  |
| Zr | 14.88710000  | -11.47830000 | 2.85450000   | O | 16.71800000  | -11.58440000 | -0.67690000  |
| Zr | -7.41330000  | 2.61400000   | 12.08450000  | O | -13.18670000 | 11.77960000  | 0.78370000   |
| Zr | -7.40820000  | 1.59600000   | -12.18470000 | O | -12.44980000 | -12.35150000 | 1.76840000   |
| Zr | 7.12660000   | 3.05080000   | 12.06620000  | O | 1.38400000   | 12.19850000  | 0.79580000   |
| Zr | 7.19100000   | 2.00330000   | -12.17860000 | O | 2.13450000   | -11.86100000 | 1.76780000   |
| Zr | -7.33040000  | -1.96330000  | 12.22860000  | O | 15.95000000  | 12.58210000  | 0.79980000   |
| Zr | -7.18700000  | -2.97600000  | -12.04110000 | O | 16.69680000  | -11.47850000 | 1.84360000   |
| Zr | 7.25850000   | -1.52010000  | 12.28040000  | O | -5.59460000  | 1.62440000   | 12.15400000  |
| Zr | 7.33510000   | -2.56550000  | -12.01820000 | O | -5.56000000  | 0.65800000   | -12.19760000 |
| O  | -14.94340000 | 9.83310000   | -1.54590000  | O | 8.95730000   | 2.07900000   | 12.08380000  |
| O  | -14.17890000 | -14.29360000 | -0.57930000  | O | 9.02350000   | 1.03990000   | -12.09420000 |
| O  | -0.34700000  | 10.29720000  | -1.58260000  | O | -5.54820000  | -0.90550000  | 12.23410000  |
| O  | 0.39230000   | -13.80600000 | -0.57190000  | O | -5.43820000  | -1.86870000  | -12.11820000 |
| O  | 14.18890000  | 10.68770000  | -1.56250000  | O | 9.02970000   | -0.44620000  | 12.20230000  |
| O  | 14.95750000  | -13.37820000 | -0.53100000  | O | 9.10260000   | -1.48450000  | -12.00630000 |
| O  | -15.03350000 | 13.47610000  | 0.59620000   | O | -16.78800000 | 11.53230000  | -1.73170000  |
| O  | -14.30120000 | -10.65430000 | 1.56750000   | O | -16.02780000 | -12.59840000 | -0.77880000  |
| O  | -0.48080000  | 13.87970000  | 0.64120000   | O | -2.21270000  | 11.97390000  | -1.73970000  |
| O  | 0.26840000   | -10.19010000 | 1.60260000   | O | -1.47560000  | -12.12820000 | -0.73810000  |
| O  | 14.12110000  | 14.30230000  | 0.62980000   | O | 12.35790000  | 12.41270000  | -1.73430000  |
| O  | 14.85750000  | -9.77100000  | 1.67230000   | O | 13.11690000  | -11.67140000 | -0.70430000  |
| O  | -7.36390000  | 1.44570000   | 10.37270000  | O | -16.78750000 | 11.68190000  | 0.78810000   |
| O  | -7.39050000  | 0.42810000   | -13.90520000 | O | -16.05010000 | -12.45260000 | 1.74140000   |

|   |              |              |              |   |              |              |              |
|---|--------------|--------------|--------------|---|--------------|--------------|--------------|
| O | -2.21760000  | 12.06490000  | 0.78960000   | P | -10.66550000 | 3.70940000   | -4.11940000  |
| O | -1.46660000  | -12.00230000 | 1.78970000   | P | -2.34410000  | 3.69050000   | -4.92190000  |
| O | 12.34890000  | 12.52800000  | 0.79120000   | P | 3.09400000   | 4.00150000   | -4.33800000  |
| O | 13.09520000  | -11.56550000 | 1.81850000   | P | 9.52770000   | 4.70880000   | -4.04610000  |
| O | -9.15090000  | -0.97270000  | 12.16760000  | H | -11.16420000 | 7.14640000   | -2.75160000  |
| O | -9.03620000  | -2.03820000  | -12.03750000 | H | -12.47610000 | 7.26910000   | -7.53200000  |
| O | 5.42840000   | -0.54870000  | 12.26920000  | H | -13.41700000 | 8.91410000   | -5.98660000  |
| O | 5.50240000   | -1.60100000  | -12.10490000 | H | -11.75990000 | -15.67180000 | -3.00950000  |
| O | -9.19630000  | 1.55570000   | 12.08840000  | H | 2.93030000   | 7.22600000   | -2.85250000  |
| O | -9.15860000  | 0.48700000   | -12.11700000 | H | 2.41850000   | 8.13850000   | -7.68440000  |
| O | 5.35460000   | 1.97880000   | 12.15070000  | H | 1.58670000   | 9.78770000   | -6.09560000  |
| O | 5.42280000   | 0.92390000   | -12.19430000 | H | 2.79650000   | -15.14000000 | -3.04290000  |
| C | -10.60150000 | 11.75530000  | -0.48010000  | H | 16.56630000  | 9.30180000   | -4.02120000  |
| C | -9.11670000  | 11.79190000  | -0.48200000  | H | 17.36350000  | -14.73050000 | -2.98550000  |
| C | -9.85480000  | -12.33770000 | 0.52190000   | H | -12.70660000 | 14.98780000  | 3.03740000   |
| C | -8.37080000  | -12.28940000 | 0.52890000   | H | -10.71410000 | -7.73760000  | 2.79030000   |
| C | 3.97060000   | 12.23420000  | -0.46460000  | H | -12.00200000 | -7.97040000  | 7.57300000   |
| C | 5.45440000   | 12.28260000  | -0.46580000  | H | -12.83020000 | -9.67130000  | 6.02300000   |
| C | 4.71610000   | -11.81610000 | 0.49380000   | H | 1.82800000   | 15.35460000  | 3.12380000   |
| C | 6.20120000   | -11.77030000 | 0.49730000   | H | 2.97590000   | -6.76020000  | 2.85030000   |
| C | 18.52460000  | 12.56810000  | -0.45330000  | H | 3.09100000   | -7.91080000  | 7.67370000   |
| C | 19.27670000  | -11.47070000 | 0.60240000   | H | 2.36280000   | -9.59100000  | 6.05850000   |
| C | -2.98830000  | 0.42260000   | 12.22630000  | H | 16.44380000  | 15.76100000  | 3.10230000   |
| C | -1.50480000  | 0.47020000   | 12.23780000  | H | 17.14890000  | -8.29970000  | 4.16100000   |
| C | -2.91780000  | -0.51280000  | -12.20120000 | H | -3.59900000  | 2.79490000   | 7.71970000   |
| C | -1.43480000  | -0.47320000  | -12.21330000 | H | -5.31010000  | 7.44860000   | 7.66750000   |
| C | 11.56020000  | 0.89470000   | 12.08390000  | H | -6.12230000  | 5.88750000   | 9.37070000   |
| C | 11.62800000  | -0.13190000  | -11.96650000 | H | -5.17780000  | 3.02190000   | -15.33480000 |
| C | -19.35750000 | 11.54100000  | -0.46780000  | H | 9.91540000   | 3.16760000   | 7.03150000   |
| C | -18.60850000 | -12.60120000 | 0.46330000   | H | 9.67460000   | 8.01400000   | 8.05310000   |
| C | -4.80000000  | 11.91500000  | -0.48160000  | H | 8.96270000   | 6.39680000   | 9.74220000   |
| C | -6.28460000  | 11.86880000  | -0.48340000  | H | 9.59170000   | 3.39390000   | -15.21550000 |
| C | -4.05580000  | -12.14520000 | 0.53400000   | H | -4.99840000  | -3.23730000  | 15.37050000  |
| C | -5.53990000  | -12.19550000 | 0.53520000   | H | -3.62000000  | -2.87490000  | -7.45980000  |
| C | 9.76890000   | 12.40990000  | -0.47340000  | H | -4.58590000  | -7.72500000  | -7.82120000  |
| C | 8.28490000   | 12.36950000  | -0.47170000  | H | -5.46790000  | -6.19760000  | -9.51680000  |
| C | 10.51910000  | -11.66240000 | 0.53410000   | H | 9.70590000   | -2.72300000  | 15.36100000  |
| C | 9.03390000   | -11.69660000 | 0.51980000   | H | 8.91300000   | -5.81650000  | -9.49690000  |
| C | -11.74170000 | 0.23840000   | 12.07190000  | H | 11.57500000  | -4.16420000  | -5.65370000  |
| C | -11.66310000 | -0.89230000  | -12.01090000 | H | 10.71600000  | -2.57310000  | -7.28180000  |
| C | 2.80780000   | 0.63210000   | 12.23710000  | H | -17.42100000 | 14.42810000  | -4.35100000  |
| C | 1.32460000   | 0.57760000   | 12.24370000  | H | -16.63960000 | -9.69440000  | -3.40010000  |
| C | 2.87850000   | -0.39490000  | -12.19970000 | H | -2.88290000  | 14.91140000  | -4.28720000  |
| C | 1.39510000   | -0.42200000  | -12.21340000 | H | -3.26550000  | -7.56860000  | -2.23280000  |
| P | 11.05020000  | -8.70360000  | -8.21300000  | H | -2.13570000  | -8.41640000  | -6.98620000  |
| P | 1.87600000   | -4.12820000  | -4.96560000  | H | -1.29370000  | -9.93510000  | -5.26470000  |
| P | -3.46060000  | -4.29530000  | -4.03170000  | H | 11.75600000  | 15.34100000  | -4.31360000  |
| P | -10.19260000 | -9.44720000  | -8.20080000  | H | 13.24200000  | -9.57580000  | -5.20920000  |
| P | -10.47360000 | -4.28480000  | 4.16270000   | H | 10.35850000  | -5.73800000  | -3.96680000  |
| P | -3.14200000  | -3.85020000  | 4.48270000   | H | 11.27900000  | -7.15560000  | -2.21400000  |
| P | 2.67470000   | -3.55710000  | 4.78840000   | H | -17.25270000 | 8.75160000   | 3.41030000   |
| P | 10.82740000  | -7.99580000  | 8.98760000   | H | -16.53670000 | -15.38270000 | 4.35390000   |
| P | -3.25390000  | 4.05350000   | 4.23840000   | H | -3.39320000  | 7.21870000   | 2.24950000   |
| P | -10.89180000 | 8.85080000   | 8.28020000   | H | -2.94210000  | 8.48190000   | 7.02350000   |

|   |              |              |              |   |              |              |              |
|---|--------------|--------------|--------------|---|--------------|--------------|--------------|
| H | -2.18170000  | 10.03480000  | 5.29700000   | H | 3.12470000   | 3.07300000   | 7.88530000   |
| H | -1.90010000  | -14.95090000 | 4.38020000   | H | 4.94800000   | 7.66750000   | 7.47800000   |
| H | 10.23230000  | 8.36330000   | 2.28940000   | H | 5.85850000   | 6.15500000   | 9.17530000   |
| H | 12.01260000  | 8.49060000   | 6.91610000   | H | 4.87380000   | 3.23960000   | -15.34630000 |
| H | 12.89880000  | 10.04050000  | 5.24100000   | H | -13.15480000 | 9.80110000   | 5.32720000   |
| H | 12.58600000  | -14.52910000 | 4.38210000   | H | -10.55870000 | 5.76560000   | 4.07570000   |
| H | -10.52480000 | -2.42580000  | 7.41090000   | H | -11.46660000 | 7.18820000   | 2.32560000   |
| H | -9.61570000  | -7.19180000  | 8.43410000   | H | -11.82420000 | -15.24320000 | 4.38590000   |
| H | -8.87020000  | -5.46770000  | 9.99800000   | H | 2.59500000   | 7.28150000   | 2.25870000   |
| H | -9.53430000  | -4.60140000  | -15.00340000 | H | 2.56850000   | 8.75230000   | 6.99480000   |
| H | 3.24170000   | -2.15590000  | 8.17420000   | H | 1.73060000   | 10.26460000  | 5.26610000   |
| H | 5.37290000   | -6.63340000  | 8.08000000   | H | 2.82110000   | -14.76960000 | 4.35320000   |
| H | 6.17920000   | -4.94580000  | 9.66280000   | H | 16.53850000  | 9.63930000   | 3.38270000   |
| H | 5.10230000   | -4.16250000  | -15.08340000 | H | 17.30090000  | -14.41980000 | 4.41860000   |
| H | -9.85070000  | 4.07970000   | 15.05760000  | H | -12.70720000 | 14.54840000  | -4.35710000  |
| H | -10.60830000 | 1.84540000   | -7.35640000  | H | -12.44560000 | -10.52890000 | -5.29520000  |
| H | -10.04690000 | 6.66090000   | -8.39750000  | H | -10.15040000 | -6.32070000  | -4.02380000  |
| H | -9.18790000  | 4.98980000   | -9.96040000  | H | -10.98610000 | -7.79540000  | -2.28070000  |
| H | 4.77000000   | 4.54300000   | 15.09140000  | H | 1.83770000   | 15.09580000  | -4.28060000  |
| H | 3.61050000   | 2.36260000   | -7.54830000  | H | 2.39750000   | -6.89960000  | -2.44620000  |
| H | 4.58150000   | 7.12120000   | -8.48170000  | H | 3.40120000   | -8.71720000  | -6.95130000  |
| H | 5.43900000   | 5.43690000   | 10.01550000  | H | 2.71540000   | -10.24040000 | -5.16320000  |
| H | -17.42000000 | 14.86670000  | 3.04710000   | H | 16.47060000  | 15.42300000  | -4.30040000  |
| H | -16.70490000 | -9.26630000  | 3.99890000   | H | 17.20990000  | -8.60990000  | -3.24480000  |
| H | -2.89450000  | 15.18500000  | 3.11580000   | H | -5.13330000  | 4.16750000   | 15.13630000  |
| H | -3.04850000  | -7.18290000  | 2.82380000   | H | -3.23560000  | 2.27930000   | -8.27070000  |
| H | -2.44120000  | -7.92770000  | 7.68840000   | H | -5.52970000  | 6.65960000   | -7.89090000  |
| H | -1.55550000  | -9.56800000  | 6.10550000   | H | -6.40290000  | 4.96770000   | -9.43360000  |
| H | 11.73030000  | 15.68030000  | 3.08810000   | H | 9.49370000   | 4.67620000   | 15.01250000  |
| H | 13.09130000  | -9.14470000  | 6.13750000   | H | 9.83760000   | 2.54950000   | -7.10720000  |
| H | 10.39700000  | -5.30510000  | 4.52980000   | H | 9.78400000   | 7.27820000   | -8.59810000  |
| H | 11.32450000  | -6.87170000  | 2.91300000   | H | 9.07680000   | 5.52520000   | -10.14750000 |
| H | -17.25360000 | 8.31220000   | -3.98840000  | H | -3.55590000  | -2.27500000  | 7.83480000   |
| H | -16.47170000 | -15.80990000 | -3.04470000  | H | -4.89410000  | -7.02990000  | 8.26880000   |
| H | -2.77060000  | 6.80500000   | -2.87450000  | H | -5.81110000  | -5.37650000  | 9.82470000   |
| H | -3.29940000  | 8.04700000   | -7.64570000  | H | -4.82240000  | -4.37640000  | -15.10270000 |
| H | -2.58160000  | 9.74390000   | -6.03490000  | H | 8.75380000   | -4.95890000  | 9.99430000   |
| H | -1.93130000  | -15.31760000 | -3.01870000  | H | 11.60940000  | -3.65930000  | 6.15480000   |
| H | 10.20170000  | 8.18070000   | -2.88230000  | H | 10.75390000  | -1.93390000  | 7.64490000   |
| H | 12.09480000  | 7.79790000   | -7.44990000  | H | 9.82140000   | -4.00850000  | -14.96170000 |
| H | 12.98090000  | 9.48740000   | -5.91520000  | H | -8.85520000  | 9.63790000   | -0.38650000  |
| H | 12.64990000  | -14.84150000 | -3.01840000  | H | -8.09670000  | -14.44050000 | 0.64480000   |
| H | -9.72000000  | -3.32750000  | 15.28710000  | H | 5.72400000   | 10.12930000  | -0.36940000  |
| H | -8.36010000  | -6.31860000  | -9.43440000  | H | 6.46360000   | -13.92460000 | 0.59560000   |
| H | -11.47480000 | -4.96440000  | -5.82150000  | H | -8.97160000  | 13.95650000  | -0.57860000  |
| H | -10.72820000 | -3.30500000  | -7.43970000  | H | -8.23870000  | -10.12430000 | 0.41520000   |
| H | 4.98780000   | -2.85550000  | 15.44110000  | H | 5.59050000   | 14.44790000  | -0.56330000  |
| H | 2.97270000   | -3.07740000  | -8.34270000  | H | 6.34620000   | -9.60620000  | 0.40200000   |
| H | 5.52360000   | -7.18340000  | -7.22480000  | H | -1.29200000  | 0.38840000   | 10.07720000  |
| H | 6.41350000   | -5.61720000  | -8.88670000  | H | -1.23410000  | -0.55750000  | -14.37370000 |
| H | -8.84090000  | 5.87570000   | 9.50590000   | H | -1.31230000  | 0.56760000   | 14.39840000  |
| H | -11.80390000 | 4.31010000   | 5.85090000   | H | -1.23050000  | -0.38070000  | -10.05190000 |
| H | -10.95450000 | 2.70290000   | 7.47120000   | H | -6.54910000  | 14.02280000  | -0.58010000  |
| H | -9.89390000  | 2.79840000   | -15.23470000 | H | -5.81480000  | -10.04390000 | 0.42020000   |



|   |              |              |              |   |              |              |             |
|---|--------------|--------------|--------------|---|--------------|--------------|-------------|
| H | 8.01810000   | 14.52190000  | -0.56790000  | H | -12.20020000 | -4.87510000  | 2.99510000  |
| H | 8.77550000   | -9.54230000  | 0.42040000   | H | -1.34960000  | -4.59310000  | 3.51910000  |
| H | -6.42680000  | 9.70430000   | -0.38700000  | H | 1.66710000   | -3.88920000  | 2.89770000  |
| H | -5.67110000  | -14.36000000 | 0.65020000   | H | 10.11680000  | -9.64650000  | 7.77830000  |
| H | 8.14600000   | 10.20320000  | -0.37420000  | H | 10.35160000  | -10.29560000 | -6.92070000 |
| H | 8.88520000   | -13.86090000 | 0.61450000   | H | 0.10360000   | -5.26220000  | -4.45080000 |
| H | 1.12600000   | 0.47930000   | 10.08190000  | H | -1.90150000  | -4.92900000  | -2.66350000 |
| H | 1.19930000   | -0.51170000  | -14.37340000 | H | -9.36820000  | -10.90070000 | -6.82250000 |
| H | 1.11770000   | 0.65860000   | 14.40320000  | H | -3.74190000  | 2.04970000   | -5.13870000 |
| H | 1.18560000   | -0.33750000  | -10.05140000 | H | -8.79290000  | 2.83320000   | -4.76760000 |
| H | 19.60560000  | 12.58660000  | -0.45010000  | C | 5.20700000   | 2.68960000   | -9.79440000 |
| H | 20.35750000  | -11.44540000 | 0.61050000   | C | 1.58930000   | 9.60260000   | -3.32950000 |
| H | 12.64060000  | 0.92780000   | 12.06350000  | C | 3.72510000   | 0.45320000   | -1.65510000 |
| H | 12.70800000  | -0.09400000  | -11.93580000 | N | 3.02060000   | 0.68890000   | -2.79850000 |
| H | -20.43830000 | 11.51330000  | -0.46610000  | C | 1.78980000   | 0.17140000   | -3.25350000 |
| H | -19.68920000 | -12.63310000 | 0.45580000   | C | 1.37810000   | 0.57530000   | -4.53950000 |
| H | -12.82240000 | 0.21610000   | 12.05200000  | C | 0.95210000   | -0.66960000  | -2.50170000 |
| H | -12.74280000 | -0.94160000  | -11.98670000 | C | 0.16980000   | 0.13020000   | -5.06360000 |
| O | 11.42680000  | -8.58620000  | -9.73900000  | H | 2.00850000   | 1.24600000   | -5.11440000 |
| O | 10.66690000  | -10.31280000 | -7.85940000  | C | -0.25270000  | -1.11670000  | -3.04800000 |
| O | 0.37970000   | -4.34240000  | -4.20810000  | H | 1.22990000   | -0.97860000  | -1.50320000 |
| O | 2.27980000   | -2.60740000  | -4.90440000  | C | -0.65230000  | -0.72750000  | -4.32530000 |
| O | -4.52790000  | -3.13560000  | -4.02060000  | H | -0.13110000  | 0.45990000   | -6.05400000 |
| O | -2.38000000  | -4.06670000  | -2.75030000  | H | -0.88480000  | -1.77130000  | -2.45460000 |
| O | -9.61910000  | -10.98110000 | -7.77720000  | H | -1.59320000  | -1.07980000  | -4.73860000 |
| O | -10.48880000 | -9.41740000  | -9.74850000  | C | 0.21460000   | 2.20310000   | -1.10120000 |
| O | -11.49000000 | -4.20940000  | 2.81260000   | C | -0.07260000  | 1.57710000   | 0.06210000  |
| O | -9.37790000  | -3.15710000  | 4.05260000   | C | 2.35190000   | 2.33390000   | -0.15830000 |
| O | -4.08760000  | -2.60390000  | 4.29060000   | N | 1.48640000   | 2.71240000   | -1.18510000 |
| O | -1.90520000  | -3.79550000  | 3.33000000   | H | 1.78050000   | 3.24710000   | -2.04390000 |
| O | 1.31530000   | -3.62100000  | 3.78380000   | H | -0.44750000  | 2.33500000   | -1.94640000 |
| O | 3.37580000   | -2.15410000  | 4.63120000   | H | -0.99990000  | 1.10380000   | 0.34870000  |
| O | 11.15150000  | -7.78800000  | 10.51590000  | S | 1.29590000   | 1.64250000   | 1.16260000  |
| O | 10.39960000  | -9.61140000  | 8.72680000   | C | 3.40120000   | 3.31420000   | 0.29930000  |
| O | 8.37830000   | 4.04860000   | 3.87130000   | C | 4.34200000   | 2.92460000   | 1.26350000  |
| O | 10.41730000  | 4.74810000   | 2.30340000   | C | 3.44910000   | 4.61780000   | -0.21170000 |
| O | -2.08660000  | 3.96920000   | 3.18280000   | C | 5.30620000   | 3.82060000   | 1.71800000  |
| O | -4.16800000  | 2.63160000   | 4.17310000   | H | 4.31950000   | 1.91510000   | 1.66740000  |
| O | -11.24110000 | 8.74120000   | 9.93180000   | C | 4.42340000   | 5.51040000   | 0.24010000  |
| O | -10.46180000 | 10.32830000  | 7.93870000   | H | 2.73570000   | 4.93370000   | -0.96550000 |
| O | -9.39760000  | 2.59380000   | -4.02060000  | C | 5.35070000   | 5.11920000   | 1.20540000  |
| O | -11.59030000 | 3.55970000   | -2.85190000  | H | 6.02060000   | 3.50350000   | 2.47190000  |
| O | -0.99080000  | 3.91790000   | -4.14810000  | H | 4.45260000   | 6.51720000   | -0.16670000 |
| O | -2.89470000  | 2.11790000   | -4.63050000  | H | 6.10400000   | 5.81860000   | 1.55720000  |
| O | 4.08920000   | 2.89030000   | -4.12520000  | H | 3.39400000   | 1.47550000   | -3.37330000 |
| O | 1.88750000   | 4.10030000   | -3.43640000  | H | 3.03980000   | 1.32880000   | -0.64340000 |
| O | 10.28790000  | 4.58470000   | -2.54000000  | C | 5.10220000   | 1.10880000   | -1.65130000 |
| O | 8.24950000   | 3.78600000   | -4.06400000  | H | 11.21310000  | 5.33650000   | 2.33880000  |
| O | 1.08070000   | 4.20950000   | 3.39830000   | H | 0.60940000   | 5.05520000   | 3.60680000  |
| O | 3.19490000   | 2.84040000   | 4.27270000   | H | 9.71800000   | 5.11280000   | -1.92580000 |
| P | 9.62810000   | 5.00420000   | 3.77740000   | C | 3.70410000   | -0.91150000  | -1.01820000 |
| P | 2.44990000   | 4.22410000   | 4.39110000   | C | 3.84020000   | -2.05030000  | -1.83080000 |
| H | -4.93910000  | 2.80060000   | 4.77120000   | C | 3.69130000   | -1.07770000  | 0.37260000  |
| H | -10.35610000 | 8.71270000   | 10.37530000  | C | 3.94340000   | -3.31830000  | -1.26300000 |

|              |              |              |             |   |              |              |              |
|--------------|--------------|--------------|-------------|---|--------------|--------------|--------------|
| H            | 3.88220000   | -1.93250000  | -2.90840000 | C | 11.27010000  | 6.73080000   | 5.79180000   |
| C            | 3.78540000   | -2.35000000  | 0.93830000  | C | 12.56300000  | 8.73800000   | 5.31710000   |
| H            | 3.59420000   | -0.21400000  | 1.02090000  | O | -1.10060000  | -13.44620000 | 3.24610000   |
| C            | 3.90730000   | -3.47480000  | 0.12430000  | O | -1.88020000  | -14.95790000 | 1.49290000   |
| H            | 4.06270000   | -4.18730000  | -1.90240000 | C | -1.74110000  | -14.53450000 | 2.76520000   |
| H            | 3.76950000   | -2.45860000  | 2.01730000  | O | -1.10140000  | 10.63670000  | 3.69580000   |
| H            | 3.98230000   | -4.46470000  | 0.56610000  | O | -1.89290000  | 9.16820000   | 1.93440000   |
| H            | 5.77910000   | 0.50900000   | -2.27380000 | C | -1.73050000  | 9.53410000   | 3.22420000   |
| H            | 5.06740000   | 2.11810000   | -2.06730000 | C | -2.23900000  | 8.57410000   | 4.23740000   |
| H            | 5.51240000   | 1.13450000   | -0.64000000 | C | -2.86290000  | 7.38120000   | 3.83030000   |
| (E)-syn-TS-S |              |              |             | C | -3.27680000  | 6.42990000   | 4.76570000   |
| O            | 13.40790000  | -10.57870000 | -3.69280000 | C | -2.52600000  | 7.88430000   | 6.55700000   |
| O            | 12.67760000  | -9.14030000  | -1.87980000 | O | -3.90080000  | 5.26970000   | 4.30390000   |
| C            | 12.77540000  | -9.49740000  | -3.17740000 | C | -3.11560000  | 6.67920000   | 6.14450000   |
| C            | 12.17660000  | -8.54870000  | -4.14730000 | C | -2.08200000  | 8.81770000   | 5.61420000   |
| C            | 11.30110000  | -7.54320000  | -3.70040000 | O | -15.61210000 | -13.42730000 | 3.46310000   |
| C            | 10.79870000  | -6.58310000  | -4.58210000 | O | -16.44950000 | -14.92860000 | 1.72830000   |
| C            | 11.97370000  | -7.66860000  | -6.40780000 | C | -16.27680000 | -14.50730000 | 2.99720000   |
| O            | 9.90740000   | -5.62810000  | -4.09020000 | O | -15.70380000 | 10.60520000  | 3.94550000   |
| C            | 11.13740000  | -6.63750000  | -5.95020000 | O | -16.51040000 | 9.09710000   | 2.20220000   |
| C            | 12.49310000  | -8.61190000  | -5.51550000 | C | -16.35040000 | 9.51700000   | 3.47320000   |
| O            | 13.33030000  | 13.62510000  | -3.26070000 | O | 6.29310000   | -3.61600000  | 10.73550000  |
| O            | 12.55050000  | 15.07380000  | -1.45560000 | O | 5.47770000   | -1.85020000  | 9.28070000   |
| C            | 12.67870000  | 14.68870000  | -2.74100000 | C | 5.61650000   | -3.13640000  | 9.66410000   |
| O            | -1.15250000  | -10.72690000 | -3.55440000 | C | 5.01390000   | -4.13300000  | 8.75060000   |
| O            | -1.91080000  | -9.22840000  | -1.80270000 | C | 3.96690000   | -3.75180000  | 7.89480000   |
| C            | -2.37750000  | -8.72410000  | -4.10640000 | C | 3.45940000   | -4.63800000  | 6.94190000   |
| C            | -3.07040000  | -7.56780000  | -3.72080000 | C | 4.98930000   | -6.34610000  | 7.74020000   |
| C            | -3.55770000  | -6.67660000  | -4.67130000 | O | 2.39890000   | -4.21750000  | 6.13770000   |
| C            | -2.70800000  | -8.06820000  | -6.42590000 | C | 3.97770000   | -5.94670000  | 6.85000000   |
| O            | -4.29420000  | -5.58610000  | -4.23670000 | C | 5.50550000   | -5.44700000  | 8.68040000   |
| C            | -3.36860000  | -6.89230000  | -6.04700000 | O | 6.03810000   | -3.14910000  | -13.49300000 |
| C            | -2.21990000  | -8.96930000  | -5.48120000 | O | 5.24340000   | -1.41460000  | -15.01820000 |
| O            | -1.29220000  | 13.47820000  | -3.06600000 | C | 5.39560000   | -2.68260000  | -14.58630000 |
| O            | -2.03490000  | 14.95760000  | -1.27020000 | O | -8.24020000  | -3.61280000  | 10.86130000  |
| C            | -1.92920000  | 14.55320000  | -2.55180000 | O | -8.98830000  | -1.81670000  | 9.41110000   |
| O            | -15.75500000 | -10.69910000 | -3.35370000 | C | -8.85130000  | -3.11440000  | 9.76040000   |
| O            | -16.49570000 | -9.19220000  | -1.58010000 | C | -9.36480000  | -4.10410000  | 8.78010000   |
| C            | -16.38490000 | -9.61230000  | -2.85640000 | C | -10.07680000 | -3.67260000  | 7.64660000   |
| O            | -15.83400000 | 13.33540000  | -2.86930000 | C | -10.50170000 | -4.58140000  | 6.67450000   |
| O            | -16.60730000 | 14.83490000  | -1.10370000 | C | -9.57170000  | -6.39830000  | 7.98770000   |
| C            | -16.48280000 | 14.41390000  | -2.37820000 | O | -11.23200000 | -4.09970000  | 5.58650000   |
| O            | 13.51790000  | -13.51380000 | 3.02770000  | C | -10.25870000 | -5.96030000  | 6.84450000   |
| O            | 12.69470000  | -14.96630000 | 1.24500000  | C | -9.12040000  | -5.48010000  | 8.94110000   |
| C            | 12.85780000  | -14.58090000 | 2.52650000  | O | -8.65290000  | -3.15230000  | -13.39530000 |
| O            | 13.43050000  | 10.69150000  | 3.46120000  | O | -9.46770000  | -1.35770000  | -14.83770000 |
| O            | 12.65810000  | 9.24760000   | 1.67060000  | C | -9.32710000  | -2.64070000  | -14.44850000 |
| C            | 12.79190000  | 9.60480000   | 2.96510000  | O | 6.39140000   | 3.20250000   | 13.46350000  |
| C            | 12.23180000  | 8.65020000   | 3.95350000  | O | 5.63750000   | 1.45940000   | 14.99960000  |
| C            | 11.38010000  | 7.61450000   | 3.52970000  | C | 5.77200000   | 2.72910000   | 14.56710000  |
| C            | 10.91680000  | 6.65090000   | 4.42900000  | O | 5.93680000   | 3.67170000   | -10.77110000 |
| C            | 12.08160000  | 7.79100000   | 6.22690000  | O | 5.13490000   | 1.90400000   | -9.30760000  |
| O            | 10.05380000  | 5.65980000   | 3.95900000  | C | 5.26700000   | 3.18920000   | -9.69730000  |
|              |              |              |             | C | 4.66230000   | 4.18680000   | -8.79170000  |

|   |              |              |              |   |              |              |              |
|---|--------------|--------------|--------------|---|--------------|--------------|--------------|
| C | 3.50340000   | 3.86450000   | -8.06800000  | O | 15.96530000  | 13.38920000  | 3.54570000   |
| C | 2.97370000   | 4.75370000   | -7.12740000  | O | 16.72040000  | 14.98290000  | 1.85620000   |
| C | 4.73280000   | 6.34050000   | -7.66900000  | C | 16.59810000  | 14.50020000  | 3.10890000   |
| O | 1.77170000   | 4.41760000   | -6.49990000  | O | 1.43400000   | -10.75570000 | 3.26470000   |
| C | 3.60040000   | 6.00120000   | -6.90810000  | O | 2.17300000   | -9.21980000  | 1.53740000   |
| C | 5.25740000   | 5.44340000   | -8.60430000  | C | 2.04250000   | -9.63180000  | 2.81730000   |
| O | -8.20700000  | 3.13850000   | 13.75690000  | C | 2.56370000   | -8.70370000  | 3.85300000   |
| O | -8.99730000  | 1.35740000   | 15.23000000  | C | 3.03230000   | -7.42890000  | 3.48870000   |
| C | -8.85200000  | 2.63780000   | 14.83350000  | C | 3.46360000   | -6.51710000  | 4.45520000   |
| O | -8.49340000  | 3.58690000   | -10.49220000 | C | 3.04120000   | -8.16900000  | 6.18200000   |
| O | -9.24030000  | 1.80510000   | -9.02130000  | O | 3.93720000   | -5.27400000  | 4.03170000   |
| C | -9.09230000  | 3.09940000   | -9.38020000  | C | 3.48160000   | -6.88720000  | 5.81670000   |
| C | -9.59360000  | 4.10550000   | -8.41260000  | C | 2.57530000   | -9.06390000  | 5.21290000   |
| C | -9.19670000  | 5.45220000   | -8.50480000  | O | 1.44800000   | 13.31670000  | 3.70540000   |
| C | -9.66820000  | 6.40500000   | -7.59300000  | O | 2.18280000   | 14.88790000  | 1.98610000   |
| C | -10.90870000 | 4.66350000   | -6.44400000  | C | 2.07880000   | 14.41970000  | 3.24590000   |
| O | -9.18470000  | 7.71160000   | -7.68250000  | O | -13.03560000 | -10.76510000 | 3.41310000   |
| C | -10.51900000 | 6.00830000   | -6.54010000  | O | -12.30450000 | -9.24830000  | 1.66620000   |
| C | -10.45620000 | 3.72390000   | -7.37110000  | C | -12.39670000 | -9.66540000  | 2.94600000   |
| O | 15.95650000  | -13.26020000 | -3.85100000  | C | -11.78730000 | -8.76650000  | 3.95730000   |
| O | 16.76900000  | -14.84960000 | -2.18440000  | C | -10.94560000 | -7.71440000  | 3.55230000   |
| C | 16.60820000  | -14.36730000 | -3.43290000  | C | -10.44480000 | -6.79640000  | 4.47940000   |
| O | 15.90840000  | 10.98480000  | -3.39300000  | C | -11.54580000 | -8.02130000  | 6.26240000   |
| O | 16.73150000  | 9.40830000   | -1.71910000  | O | -9.59960000  | -5.78180000  | 4.02610000   |
| C | 16.57040000  | 9.88590000   | -2.96950000  | C | -10.74890000 | -6.94190000  | 5.84890000   |
| O | 1.46030000   | -13.34550000 | -3.59960000  | C | -12.06520000 | -8.92120000  | 5.32670000   |
| O | 2.25300000   | -14.88660000 | -1.87870000  | O | -13.17370000 | 13.29300000  | 3.93000000   |
| C | 2.11380000   | -14.43580000 | -3.14160000  | O | -12.42280000 | 14.83680000  | 2.19310000   |
| O | 1.27360000   | 10.82030000  | -3.19640000  | C | -12.54030000 | 14.38970000  | 3.45940000   |
| O | 2.05070000   | 9.25580000   | -1.51100000  | O | 8.86160000   | 3.19850000   | 10.71150000  |
| C | 1.87680000   | 9.68170000   | -2.78160000  | O | 9.56070000   | 1.45980000   | 9.16960000   |
| C | 2.32580000   | 8.74990000   | -3.84390000  | C | 9.44090000   | 2.74280000   | 9.57560000   |
| C | 2.57410000   | 7.40130000   | -3.53750000  | C | 9.93850000   | 3.77130000   | 8.62710000   |
| C | 2.93630000   | 6.49320000   | -4.53520000  | C | 10.61510000  | 3.38600000   | 7.45610000   |
| C | 2.87980000   | 8.28500000   | -6.16970000  | C | 11.02590000  | 4.33520000   | 6.51680000   |
| O | 3.17130000   | 5.16670000   | -4.17410000  | C | 10.15480000  | 6.09820000   | 7.93910000   |
| C | 3.11200000   | 6.93430000   | -5.86310000  | O | 11.72070000  | 3.89670000   | 5.38830000   |
| C | 2.47490000   | 9.18090000   | -5.17390000  | C | 10.80490000  | 5.70750000   | 6.75790000   |
| O | -13.21540000 | -13.37780000 | -3.43560000  | C | 9.71720000   | 5.14100000   | 8.85980000   |
| O | -12.39620000 | -14.92100000 | -1.72880000  | O | 8.49900000   | 3.72680000   | -13.43800000 |
| C | -12.56260000 | -14.47360000 | -2.98950000  | O | 9.32950000   | 2.00640000   | -14.95990000 |
| O | -13.24560000 | 10.68850000  | -2.91800000  | C | 9.16520000   | 3.27060000   | -14.52140000 |
| O | -12.45140000 | 9.16050000   | -1.20990000  | O | -5.67350000  | 3.19840000   | 11.05500000  |
| C | -12.59370000 | 9.58340000   | -2.48400000  | O | -4.92360000  | 1.48670000   | 9.50570000   |
| C | -12.01700000 | 8.70090000   | -3.53140000  | C | -5.04650000  | 2.75930000   | 9.93680000   |
| C | -12.16640000 | 9.00780000   | -4.89670000  | C | -4.49330000  | 3.78970000   | 9.02610000   |
| C | -11.63550000 | 8.16950000   | -5.88540000  | C | -3.58380000  | 3.41820000   | 8.02050000   |
| C | -10.82300000 | 6.67330000   | -4.15690000  | C | -3.13640000  | 4.34530000   | 7.07710000   |
| O | -11.87190000 | 8.48350000   | -7.22490000  | C | -4.43520000  | 6.07260000   | 8.18330000   |
| C | -10.98110000 | 6.97560000   | -5.51750000  | O | -2.21740000  | 3.92530000   | 6.11370000   |
| C | -11.32630000 | 7.52820000   | -3.17560000  | C | -3.56500000  | 5.68690000   | 7.14970000   |
| O | 16.08290000  | -10.85790000 | 3.08720000   | C | -4.90040000  | 5.13230000   | 9.10970000   |
| O | 16.84810000  | -9.27600000  | 1.39110000   | O | -6.03320000  | 3.66460000   | -13.24540000 |
| C | 16.72590000  | -9.75480000  | 2.64540000   | O | -5.30410000  | 1.97270000   | -14.84890000 |

|   |              |              |              |   |              |              |              |
|---|--------------|--------------|--------------|---|--------------|--------------|--------------|
| C | -5.42100000  | 3.22640000   | 14.36740000  | C | -10.66170000 | 6.60130000   | 4.96640000   |
| O | 8.91040000   | -3.65300000  | 13.35440000  | O | -11.71150000 | 8.27700000   | 8.10950000   |
| O | 9.75300000   | -1.92640000  | 14.86280000  | C | -10.81570000 | 6.84850000   | 6.33830000   |
| C | 9.59230000   | -3.19170000  | 14.42590000  | C | -11.18650000 | 7.48330000   | 4.02240000   |
| O | 8.56420000   | -3.12080000  | -10.79370000 | O | 15.96330000  | -10.59650000 | -3.75000000  |
| O | 9.27360000   | -1.37710000  | -9.26260000  | O | 16.78820000  | -9.14690000  | -1.96600000  |
| C | 9.16140000   | -2.66050000  | -9.66930000  | C | 16.62190000  | -9.52890000  | -3.24820000  |
| C | 9.69390000   | -3.68500000  | -8.73620000  | O | 15.89000000  | 13.64860000  | -3.29020000  |
| C | 10.37060000  | -3.29430000  | -7.56720000  | O | 16.68320000  | 15.11020000  | -1.50170000  |
| C | 10.81740000  | -4.24270000  | -6.64390000  | C | 16.53300000  | 14.72380000  | -2.78440000  |
| C | 9.98190000   | -6.01280000  | -8.07820000  | O | 1.39070000   | -10.65260000 | -3.56800000  |
| O | 11.50580000  | -3.79870000  | -5.51390000  | O | 2.13670000   | -9.16300000  | -1.80290000  |
| C | 10.63230000  | -5.61740000  | -6.89890000  | C | 1.98540000   | -9.53110000  | -3.09370000  |
| C | 9.50910000   | -5.05770000  | -8.98320000  | C | 2.45320000   | -8.54590000  | -4.10200000  |
| O | -5.68540000  | -3.71490000  | 13.53390000  | C | 2.79630000   | -7.24080000  | -3.70530000  |
| O | -4.88180000  | -2.02820000  | 15.10750000  | C | 3.18080000   | -6.27910000  | -4.64320000  |
| C | -5.03020000  | -3.28150000  | 14.63340000  | C | 2.95900000   | -7.93330000  | -6.40510000  |
| O | -6.00870000  | -3.25260000  | -10.80910000 | O | 3.53550000   | -5.00890000  | -4.18480000  |
| O | -5.19600000  | -1.56860000  | -9.26230000  | C | 3.28260000   | -6.62550000  | -6.00710000  |
| C | -4.77400000  | -3.89340000  | -8.83180000  | C | 2.53490000   | -8.88000000  | -5.46530000  |
| C | -4.04880000  | -3.54790000  | -7.68240000  | O | 1.27890000   | 13.49510000  | -3.12850000  |
| C | -3.58990000  | -4.52300000  | -6.80400000  | O | 2.10720000   | 14.97210000  | -1.36860000  |
| C | -4.51960000  | -6.23050000  | -8.20140000  | C | 1.93720000   | 14.57100000  | -2.64430000  |
| O | -2.84430000  | -4.12440000  | -5.70450000  | O | -13.19460000 | -10.70410000 | -3.39790000  |
| C | -3.82930000  | -5.88810000  | -7.03030000  | O | -12.38810000 | -9.21400000  | -1.66230000  |
| C | -4.98870000  | -5.25910000  | -9.08600000  | C | -12.53940000 | -9.60850000  | -2.94370000  |
| O | 16.07750000  | -13.52160000 | 2.98410000   | C | -11.97220000 | -8.69650000  | -3.96980000  |
| O | 16.82860000  | -14.97790000 | 1.17310000   | C | -12.19650000 | -8.91870000  | -5.34100000  |
| C | 16.71260000  | -14.59260000 | 2.45980000   | C | -11.68320000 | -8.04040000  | -6.30480000  |
| O | 15.98610000  | 10.72560000  | 3.44490000   | C | -10.73240000 | -6.67940000  | -4.53530000  |
| O | 16.76870000  | 9.28040000   | 1.63850000   | O | -11.99840000 | -8.26100000  | -7.64640000  |
| C | 16.63670000  | 9.66200000   | 2.92470000   | C | -10.97080000 | -6.89240000  | -5.90060000  |
| O | 1.46490000   | -13.42790000 | 3.23900000   | C | -11.21920000 | -7.57310000  | -3.58210000  |
| O | 2.26200000   | -14.92340000 | 1.48000000   | O | -13.27560000 | 13.35620000  | -2.90610000  |
| C | 2.12200000   | -14.50420000 | 2.75360000   | O | -12.47060000 | 14.86670000  | -1.16400000  |
| O | 1.43840000   | 10.63700000  | 3.63240000   | C | -12.62700000 | 14.44350000  | -2.43420000  |
| O | 2.15880000   | 9.17830000   | 1.83210000   | O | 8.95890000   | 3.18750000   | 13.38880000  |
| C | 2.05130000   | 9.53860000   | 3.12950000   | O | 9.77570000   | 1.43440000   | 14.88060000  |
| C | 2.60550000   | 8.57450000   | 4.11580000   | C | 9.63320000   | 2.70610000   | 14.45610000  |
| C | 3.19890000   | 7.37680000   | 3.67740000   | O | 8.47250000   | 3.70720000   | -10.77000000 |
| C | 3.65400000   | 6.42190000   | 4.59030000   | O | 9.24430000   | 1.97530000   | -9.25520000  |
| C | 3.00730000   | 7.88100000   | 6.41760000   | C | 9.09850000   | 3.25660000   | -9.65750000  |
| O | 4.24570000   | 5.25800000   | 4.09720000   | C | 9.64000000   | 4.29100000   | -8.74120000  |
| C | 3.56710000   | 6.67180000   | 5.97560000   | C | 9.33560000   | 5.65270000   | -8.92630000  |
| C | 2.52110000   | 8.81800000   | 5.49900000   | C | 9.83430000   | 6.62710000   | -8.05140000  |
| O | -13.05230000 | -13.44000000 | 3.40010000   | C | 10.92810000  | 4.88360000   | -6.76540000  |
| O | -12.31880000 | -14.95290000 | 1.62860000   | O | 9.43170000   | 7.95230000   | -8.22750000  |
| C | -12.42350000 | -14.52810000 | 2.90360000   | C | 10.61830000  | 6.24010000   | -6.94510000  |
| O | -13.14250000 | 10.62700000  | 3.89220000   | C | 10.45020000  | 3.92140000   | -7.65390000  |
| O | -12.40140000 | 9.13190000   | 2.13170000   | O | -5.63790000  | 3.12020000   | 13.74260000  |
| C | -12.50330000 | 9.53160000   | 3.41710000   | O | -4.86590000  | 1.32960000   | 15.21380000  |
| C | -11.89440000 | 8.62900000   | 4.42760000   | C | -4.99340000  | 2.61140000   | 14.81590000  |
| C | -12.03310000 | 8.88550000   | 5.80460000   | O | -5.95850000  | 3.56290000   | -10.57180000 |
| C | -11.48020000 | 8.01930000   | 6.75710000   | O | -5.18170000  | 1.76530000   | -9.14050000  |

|   |             |              |              |   |              |              |              |
|---|-------------|--------------|--------------|---|--------------|--------------|--------------|
| C | -5.30950000 | 3.06200000   | -9.49330000  | O | -3.99670000  | -5.45150000  | 3.98850000   |
| C | -4.73810000 | 4.04890000   | -8.54150000  | C | -3.19600000  | -6.89860000  | 5.79450000   |
| C | -4.06020000 | 3.61090000   | -7.38860000  | C | -2.12610000  | -9.00500000  | 5.21450000   |
| C | -3.60540000 | 4.52320000   | -6.43320000  | O | -1.11790000  | 13.31090000  | 3.76780000   |
| C | -4.41270000 | 6.35030000   | -7.81010000  | O | -1.95570000  | 14.87160000  | 2.08590000   |
| O | -2.95630000 | 4.03690000   | -5.29810000  | C | -1.78270000  | 14.40650000  | 3.33940000   |
| C | -3.77830000 | 5.90670000   | -6.63950000  | O | -15.59310000 | -10.76160000 | 3.48800000   |
| C | -4.89790000 | 5.43170000   | -8.74650000  | O | -16.41540000 | -9.22240000  | 1.77930000   |
| O | 8.82680000  | -3.63290000  | 10.68460000  | C | -16.24480000 | -9.66580000  | 3.04100000   |
| O | 9.56000000  | -1.89170000  | 9.16060000   | O | -15.73200000 | 13.27090000  | 3.96970000   |
| C | 9.42700000  | -3.17510000  | 9.56090000   | O | -16.55700000 | 14.80340000  | 2.25660000   |
| C | 9.94920000  | -4.20390000  | 8.62800000   | C | -16.39480000 | 14.35840000  | 3.51870000   |
| C | 9.61930000  | -5.56240000  | 8.79190000   | O | 13.39590000  | -13.25070000 | -3.80340000  |
| C | 10.09820000 | -6.53090000  | 7.89990000   | O | 12.63460000  | -14.83710000 | -2.10960000  |
| C | 11.22120000 | -4.78800000  | 6.63920000   | C | 12.75250000  | -14.35400000 | -3.36260000  |
| O | 9.67760000  | -7.85240000  | 8.05630000   | O | 13.34880000  | 10.95360000  | -3.35110000  |
| C | 10.88700000 | -6.14120000  | 6.79860000   | O | 12.62360000  | 9.37170000   | -1.66100000  |
| C | 10.76320000 | -3.83150000  | 7.54460000   | C | 12.72330000  | 9.82940000   | -2.92650000  |
| O | 8.60530000  | -3.11220000  | -13.46820000 | C | 12.12870000  | 8.96020000   | -3.97320000  |
| O | 9.38080000  | -1.35380000  | -14.97540000 | C | 12.35160000  | 9.21190000   | -5.33960000  |
| C | 9.25620000  | -2.62620000  | -14.54790000 | C | 11.81490000  | 8.36910000   | -6.32280000  |
| O | -5.71770000 | -3.62690000  | 10.85030000  | C | 10.83970000  | 6.98830000   | -4.58200000  |
| O | -4.94400000 | -1.83720000  | 9.40470000   | O | 12.13280000  | 8.61400000   | -7.65990000  |
| C | -5.08850000 | -3.13170000  | 9.75750000   | C | 11.07900000  | 7.22750000   | -5.94270000  |
| C | -4.55840000 | -4.11840000  | 8.78640000   | C | 11.35100000  | 7.84630000   | -3.60970000  |
| C | -3.66390000 | -3.70650000  | 7.78250000   | O | -1.10470000  | -13.38780000 | -3.59410000  |
| C | -3.22870000 | -4.59730000  | 6.79840000   | O | -1.88560000  | -14.92710000 | -1.86550000  |
| C | -4.51670000 | -6.36520000  | 7.85080000   | C | -1.74710000  | -14.48260000 | -3.13070000  |
| O | -2.32330000 | -4.14350000  | 5.83770000   | O | -1.24580000  | 10.78980000  | -3.13210000  |
| C | -3.65520000 | -5.94050000  | 6.82640000   | O | -1.97060000  | 9.24570000   | -1.40410000  |
| C | -4.97030000 | -5.46210000  | 8.81780000   | C | -1.85420000  | 9.66650000   | -2.68210000  |
| O | -6.08840000 | -3.16870000  | -13.47900000 | C | -2.38930000  | 8.74320000   | -3.71140000  |
| O | -5.32950000 | -1.38340000  | -14.96280000 | C | -3.27080000  | 7.71210000   | -3.34350000  |
| C | -5.46750000 | -2.66490000  | -14.56820000 | C | -3.71550000  | 6.77760000   | -4.28220000  |
| O | 13.52330000 | -10.84150000 | 3.11870000   | C | -2.45700000  | 7.93330000   | -6.00670000  |
| O | 12.74230000 | -9.26330000  | 1.45040000   | O | -4.62360000  | 5.80030000   | -3.87030000  |
| C | 12.88150000 | -9.71950000  | 2.71280000   | C | -3.31020000  | 6.88430000   | -5.62930000  |
| C | 12.31630000 | -8.85100000  | 3.77680000   | C | -1.99500000  | 8.85010000   | -5.05680000  |
| C | 12.54460000 | -9.12690000  | 5.13780000   | O | -15.77440000 | -13.36460000 | -3.37650000  |
| C | 12.03420000 | -8.28710000  | 6.13770000   | O | -16.52930000 | -14.89770000 | -1.63170000  |
| C | 11.07910000 | -6.85830000  | 4.42410000   | C | -16.41680000 | -14.45320000 | -2.89940000  |
| O | 12.36190000 | -8.55740000  | 7.46800000   | O | -15.80720000 | 10.67010000  | -2.89590000  |
| C | 11.32290000 | -7.12260000  | 5.77940000   | O | -16.56140000 | 9.12910000   | -1.15780000  |
| C | 11.56200000 | -7.71410000  | 3.43570000   | C | -16.43980000 | 9.57310000   | -2.42490000  |
| O | 13.40450000 | 13.36360000  | 3.57120000   | O | 6.34390000   | -3.63510000  | 13.42260000  |
| O | 12.58500000 | 14.94450000  | 1.89960000   | O | 5.62340000   | -1.90030000  | 14.98380000  |
| C | 12.74170000 | 14.46270000  | 3.14870000   | C | 5.73620000   | -3.16650000  | 14.53490000  |
| O | -1.11030000 | -10.76240000 | 3.26040000   | O | 6.03240000   | -3.16040000  | -10.81240000 |
| O | -1.87470000 | -9.24050000  | 1.53300000   | O | 5.19560000   | -1.43470000  | -9.32080000  |
| C | -1.73910000 | -9.64900000  | 2.81230000   | C | 5.35900000   | -2.71190000  | -9.72630000  |
| C | -2.27680000 | -8.72610000  | 3.84420000   | C | 4.78470000   | -3.74090000  | -8.83180000  |
| C | -2.91930000 | -7.53290000  | 3.46390000   | C | 3.68320000   | -3.42880000  | -8.01800000  |
| C | -3.35380000 | -6.61300000  | 4.42190000   | C | 3.18020000   | -4.35900000  | -7.10310000  |
| C | -2.59050000 | -8.10510000  | 6.17810000   | C | 4.84230000   | -5.96490000  | -7.84810000  |

|    |              |              |              |    |              |              |              |
|----|--------------|--------------|--------------|----|--------------|--------------|--------------|
| O  | 2.04830000   | -4.01950000  | -6.36020000  | Zr | -16.08510000 | -10.48440000 | 0.07930000   |
| C  | 3.76710000   | -5.63890000  | -7.00390000  | O  | -18.20070000 | -10.83900000 | 0.12660000   |
| C  | 5.34730000   | -5.02520000  | -8.75300000  | Zr | -16.19100000 | 13.54930000  | 0.55870000   |
| O  | -8.25600000  | -3.69920000  | 13.54420000  | O  | -18.30220000 | 13.16710000  | 0.58680000   |
| O  | -9.02060000  | -2.00240000  | 15.12610000  | Zr | 13.05550000  | -13.63110000 | -0.39040000  |
| C  | -8.89360000  | -3.25760000  | 14.65060000  | O  | 10.94650000  | -13.23980000 | -0.33710000  |
| O  | -8.54330000  | -3.23860000  | -10.71840000 | C  | 8.15230000   | -13.23410000 | -0.26100000  |
| O  | -9.25620000  | -1.54660000  | -9.13000000  | Zr | 12.99830000  | 10.59450000  | 0.04900000   |
| C  | -9.12830000  | -2.81680000  | -9.57260000  | O  | 10.88240000  | 10.92830000  | 0.08140000   |
| C  | -9.63110000  | -3.87560000  | -8.66340000  | C  | 8.08230000   | 10.89480000  | 0.10930000   |
| C  | -9.28840000  | -5.22490000  | -8.86900000  | Zr | -1.50800000  | -13.66660000 | -0.17510000  |
| C  | -9.75120000  | -6.22450000  | -8.00360000  | O  | -3.62310000  | -13.29660000 | -0.17020000  |
| C  | -10.87380000 | -4.52910000  | -6.67780000  | C  | -6.42620000  | -13.30330000 | -0.14890000  |
| O  | -9.31550000  | -7.53580000  | -8.20430000  | Zr | -1.59060000  | 10.49790000  | 0.28720000   |
| C  | -10.53420000 | -5.87490000  | -6.88370000  | O  | -3.70380000  | 10.84060000  | 0.34170000   |
| C  | -10.43320000 | -3.54190000  | -7.55870000  | C  | -6.50050000  | 10.81960000  | 0.38900000   |
| O  | 6.33260000   | 3.21490000   | 10.78190000  | Zr | -16.10150000 | -13.64220000 | 0.05080000   |
| O  | 5.50550000   | 1.48060000   | 9.29840000   | O  | -18.21330000 | -13.26600000 | 0.10440000   |
| C  | 5.65980000   | 2.76090000   | 9.69730000   | Zr | -16.16760000 | 10.39080000  | 0.52870000   |
| C  | 5.07980000   | 3.78360000   | 8.79350000   | O  | -18.28430000 | 10.74010000  | 0.56420000   |
| C  | 4.12250000   | 3.41100000   | 7.83390000   | Zr | 5.89370000   | -0.19630000  | 10.56370000  |
| C  | 3.63170000   | 4.33700000   | 6.90990000   | O  | 3.79520000   | -0.18870000  | 10.97750000  |
| C  | 4.99190000   | 6.06290000   | 7.94130000   | C  | 1.00980000   | -0.20480000  | 11.02850000  |
| O  | 2.66010000   | 3.91850000   | 5.99920000   | Zr | 5.59080000   | 0.26460000   | 13.73470000  |
| C  | 4.06710000   | 5.67810000   | 6.95640000   | O  | 3.47390000   | 0.23560000   | -13.37580000 |
| C  | 5.49890000   | 5.12440000   | 8.84720000   | C  | 0.66230000   | 0.22220000   | -13.36850000 |
| O  | 5.93290000   | 3.68710000   | -13.45580000 | Zr | -8.64260000  | -0.18890000  | 10.75530000  |
| O  | 5.19590000   | 1.94580000   | -15.00190000 | O  | -10.75660000 | -0.19680000  | 11.11260000  |
| C  | 5.30720000   | 3.21300000   | -14.55570000 | Zr | -9.03440000  | 0.27630000   | -13.52180000 |
| O  | -8.20230000  | 3.21590000   | 11.08010000  | O  | -11.13650000 | 0.27860000   | -13.08540000 |
| O  | -8.98930000  | 1.52640000   | 9.52430000   | Zr | 5.97800000   | -0.21590000  | 13.70910000  |
| C  | -8.83730000  | 2.79560000   | 9.96060000   | O  | 3.85540000   | -0.21290000  | 13.38820000  |
| C  | -9.37710000  | 3.85290000   | 9.07220000   | C  | 1.04980000   | -0.24480000  | 13.44760000  |
| C  | -8.99610000  | 5.19760000   | 9.23450000   | Zr | 5.56470000   | 0.24770000   | -10.58650000 |
| C  | -9.48980000  | 6.19260000   | 8.38030000   | O  | 3.46240000   | 0.21380000   | -10.96470000 |
| C  | -10.73010000 | 4.50100000   | 7.15870000   | C  | 0.68700000   | 0.17130000   | -10.94900000 |
| O  | -9.01610000  | 7.49730000   | 8.52990000   | Zr | -8.63270000  | -0.28570000  | 13.90450000  |
| C  | -10.34660000 | 5.84110000   | 7.31640000   | O  | -10.74840000 | -0.25880000  | 13.53930000  |
| C  | -10.25610000 | 3.51950000   | 8.02780000   | Zr | -8.93950000  | 0.16910000   | -10.37140000 |
| O  | -8.59770000  | 3.68270000   | -13.16540000 | O  | -11.06400000 | 0.19040000   | -10.66050000 |
| O  | -9.44100000  | 2.00210000   | -14.72420000 | Zr | 16.42250000  | -13.64020000 | -0.45030000  |
| C  | -9.27990000  | 3.25380000   | -14.24990000 | O  | 18.53800000  | -13.28190000 | -0.47430000  |
| Zr | 13.07290000  | -10.48480000 | -0.26950000  | Zr | 16.36100000  | 10.61510000  | 0.01250000   |
| O  | 10.95850000  | -10.83010000 | -0.24290000  | O  | 18.47180000  | 11.00020000  | 0.00370000   |
| C  | 8.15570000   | -10.81530000 | -0.21810000  | Zr | 1.86010000   | -13.63620000 | -0.18440000  |
| Zr | 12.96490000  | 13.74100000  | 0.16910000   | O  | 3.96650000   | -13.23710000 | -0.18660000  |
| O  | 10.85760000  | 13.33800000  | 0.17290000   | C  | 6.75610000   | -13.23250000 | -0.23810000  |
| C  | 8.06150000   | 13.31290000  | 0.18140000   | Zr | 1.76870000   | 10.50800000  | 0.20310000   |
| Zr | -1.52700000  | -10.51910000 | -0.14250000  | O  | 3.88090000   | 10.86840000  | 0.15430000   |
| O  | -3.63450000  | -10.88540000 | -0.12420000  | C  | 6.68460000   | 10.88250000  | 0.12030000   |
| C  | -6.42470000  | -10.88400000 | -0.10460000  | Zr | -12.73540000 | -13.66220000 | -0.02920000  |
| Zr | -1.60540000  | 13.64380000  | 0.36600000   | O  | -10.62260000 | -13.29360000 | -0.07220000  |
| O  | -3.71510000  | 13.25160000  | 0.40250000   | C  | -7.82340000  | -13.30210000 | -0.13260000  |
| C  | -6.51410000  | 13.23830000  | 0.44260000   | Zr | -12.80460000 | 10.42470000  | 0.47810000   |

|    |              |              |              |    |              |              |              |
|----|--------------|--------------|--------------|----|--------------|--------------|--------------|
| O  | -10.69520000 | 10.79900000  | 0.45100000   | Zr | 7.63000000   | 2.07230000   | 12.09270000  |
| C  | -7.89760000  | 10.81130000  | 0.40590000   | Zr | 7.22450000   | 2.56940000   | -12.12440000 |
| Zr | 16.43560000  | -10.48450000 | -0.32960000  | Zr | -6.93790000  | 2.04100000   | 12.38780000  |
| O  | 18.54800000  | -10.85660000 | -0.38160000  | Zr | -7.28370000  | 2.49700000   | -11.91790000 |
| Zr | 16.33210000  | 13.77070000  | 0.13300000   | O  | 14.73160000  | -10.25900000 | -1.46870000  |
| O  | 18.44950000  | 13.42540000  | 0.09650000   | O  | 14.63390000  | 13.97670000  | -1.01840000  |
| Zr | 1.83190000   | -10.48800000 | -0.15190000  | O  | 0.14580000   | -10.31360000 | -1.32060000  |
| O  | 3.94970000   | -10.82500000 | -0.17860000  | O  | 0.04970000   | 13.85810000  | -0.84600000  |
| C  | 6.75760000   | -10.81370000 | -0.19580000  | O  | -14.42900000 | -10.30730000 | -1.13620000  |
| Zr | 1.76200000   | 13.65570000  | 0.28530000   | O  | -14.52590000 | 13.75090000  | -0.64120000  |
| O  | 3.87270000   | 13.27930000  | 0.23420000   | O  | 14.75910000  | -13.85690000 | 0.74890000   |
| C  | 6.66500000   | 13.30060000  | 0.19230000   | O  | 14.69190000  | 10.37950000  | 1.20010000   |
| Zr | -12.72360000 | -10.51310000 | -0.00140000  | O  | 0.18110000   | -13.84080000 | 0.99510000   |
| O  | -10.61470000 | -10.88210000 | -0.05470000  | O  | 0.11840000   | 10.29510000  | 1.41550000   |
| C  | -7.82100000  | -10.88290000 | -0.08840000  | O  | -14.39140000 | -13.83900000 | 1.18610000   |
| Zr | -12.82330000 | 13.57610000  | 0.50860000   | O  | -14.46500000 | 10.21730000  | 1.67890000   |
| O  | -10.70960000 | 13.21070000  | 0.47780000   | O  | 7.55820000   | -1.38290000  | 10.32430000  |
| C  | -7.91110000  | 13.23000000  | 0.45920000   | O  | 7.29470000   | -0.88640000  | -13.89860000 |
| Zr | 9.25130000   | -0.21890000  | 10.46010000  | O  | -6.96990000  | -1.36790000  | 10.53620000  |
| O  | 11.37590000  | -0.22440000  | 10.74860000  | O  | -7.36420000  | -0.90440000  | -13.78960000 |
| Zr | 8.95980000   | 0.31430000   | -13.69900000 | O  | 7.67440000   | 0.95000000   | 13.84230000  |
| O  | 11.06950000  | 0.34560000   | -13.30120000 | O  | 7.22320000   | 1.44930000   | -10.37780000 |
| Zr | -5.28350000  | -0.21120000  | 10.74670000  | O  | -6.93960000  | 0.87450000   | 14.10900000  |
| O  | -3.17190000  | -0.22950000  | 11.08910000  | O  | -7.24510000  | 1.32680000   | -10.20650000 |
| C  | -0.38540000  | -0.22180000  | 11.05060000  | O  | 14.71750000  | -13.76670000 | -1.60320000  |
| Zr | -5.66550000  | 0.25370000   | -13.62330000 | O  | 14.66590000  | 10.46900000  | -1.15240000  |
| O  | -3.54340000  | 0.22730000   | -13.30030000 | O  | 0.17510000   | -13.81680000 | -1.35810000  |
| C  | -0.73550000  | 0.21560000   | -13.35290000 | O  | 0.06000000   | 10.35760000  | -0.93150000  |
| Zr | 9.34570000   | -0.23640000  | 13.61070000  | O  | -14.44730000 | -13.81770000 | -1.16770000  |
| O  | 11.44800000  | -0.24930000  | 13.17490000  | O  | -14.50060000 | 10.23920000  | -0.67540000  |
| Zr | 8.92310000   | 0.29860000   | -10.54600000 | O  | 14.77360000  | -10.34920000 | 0.88330000   |
| O  | 11.04190000  | 0.32230000   | -10.87380000 | O  | 14.65980000  | 13.88730000  | 1.33410000   |
| Zr | -5.26360000  | -0.30730000  | 13.89070000  | O  | 0.15420000   | -10.33730000 | 1.03010000   |
| O  | -3.15290000  | -0.29860000  | 13.49970000  | O  | 0.10640000   | 13.79720000  | 1.50620000   |
| C  | -0.34760000  | -0.26220000  | 13.46970000  | O  | -14.37270000 | -10.32870000 | 1.21750000   |
| Zr | -5.58240000  | 0.14670000   | -10.47660000 | O  | -14.49080000 | 13.72890000  | 1.71170000   |
| O  | -3.48550000  | 0.15310000   | -10.89010000 | O  | 7.57350000   | 0.96830000   | 10.33850000  |
| C  | -0.70700000  | 0.16440000   | -10.93340000 | O  | 7.25960000   | 1.46690000   | -13.88670000 |
| Zr | 14.70320000  | -11.96870000 | -2.64650000  | O  | -6.95480000  | 0.98030000   | 10.60710000  |
| Zr | 14.63550000  | 12.26360000  | -2.19600000  | O  | -7.34590000  | 1.44640000   | -13.70990000 |
| Zr | 0.15900000   | -12.05000000 | -2.45230000  | O  | 7.65940000   | -1.40400000  | 13.82880000  |
| Zr | 0.02900000   | 12.13150000  | -2.00250000  | O  | 7.25820000   | -0.90330000  | -10.39070000 |
| Zr | -14.46190000 | -12.05070000 | -2.26290000  | O  | -6.95510000  | -1.47850000  | 14.03730000  |
| Zr | -14.52800000 | 12.00460000  | -1.76830000  | O  | -7.26260000  | -1.02330000  | -10.28620000 |
| Zr | 14.78390000  | -12.14410000 | 1.92670000   | O  | 12.92110000  | -12.00700000 | -1.59070000  |
| Zr | 14.68630000  | 12.08950000  | 2.37770000   | O  | 12.84690000  | 12.21280000  | -1.15250000  |
| Zr | 0.16960000   | -12.09680000 | 2.12560000   | O  | -1.63980000  | -12.07920000 | -1.42310000  |
| Zr | 0.13980000   | 12.01400000  | 2.57350000   | O  | -1.74840000  | 12.10010000  | -0.93620000  |
| Zr | -14.35330000 | -12.09230000 | 2.31300000   | O  | -16.23890000 | -12.05100000 | -1.19400000  |
| Zr | -14.45950000 | 11.96180000  | 2.80530000   | O  | -16.31420000 | 11.98090000  | -0.71610000  |
| Zr | 7.60010000   | -2.50620000  | 12.06700000  | O  | 12.96560000  | -12.10420000 | 0.93500000   |
| Zr | 7.29290000   | -2.00660000  | -12.14730000 | O  | 12.87440000  | 12.11650000  | 1.37330000   |
| Zr | -6.96890000  | -2.53670000  | 12.24760000  | O  | -1.63500000  | -12.10470000 | 1.10680000   |
| Zr | -7.31940000  | -2.07470000  | -12.07270000 | O  | -1.68710000  | 12.03670000  | 1.59430000   |

|   |              |              |              |   |              |              |              |
|---|--------------|--------------|--------------|---|--------------|--------------|--------------|
| O | -16.17900000 | -12.07400000 | 1.32970000   | C | -10.10750000 | 12.00810000  | 0.45750000   |
| O | -16.27640000 | 11.95730000  | 1.80700000   | C | -8.62230000  | 12.01650000  | 0.44040000   |
| O | 5.80700000   | -1.47050000  | 12.12980000  | C | 11.98410000  | -0.23980000  | 11.94440000  |
| O | 5.47640000   | -1.00980000  | -12.16630000 | C | 11.62790000  | 0.34190000   | -12.08070000 |
| O | -8.76470000  | -1.50130000  | 12.28960000  | C | -2.56790000  | -0.26160000  | 12.28900000  |
| O | -9.11380000  | -1.04010000  | -11.98470000 | C | -1.08380000  | -0.25060000  | 12.27110000  |
| O | 5.82230000   | 1.06010000   | 12.14480000  | C | -2.92070000  | 0.18850000   | -12.10850000 |
| O | 5.43890000   | 1.51860000   | -12.15310000 | C | -1.43790000  | 0.18800000   | -12.13440000 |
| O | -8.74710000  | 1.02820000   | 12.36740000  | P | -10.42050000 | 8.84080000   | -8.07450000  |
| O | -9.09400000  | 1.48690000   | -11.89930000 | P | -3.93050000  | 4.22850000   | -3.89650000  |
| O | 16.52270000  | -12.01430000 | -1.65310000  | P | 1.96780000   | 4.12520000   | -4.81830000  |
| O | 16.44850000  | 12.24190000  | -1.18970000  | P | 10.74630000  | 8.99590000   | -8.60290000  |
| O | 1.96360000   | -12.04610000 | -1.43400000  | P | 10.80490000  | 4.11520000   | 3.95110000   |
| O | 1.85580000   | 12.11350000  | -1.02340000  | P | 3.26830000   | 3.87650000   | 4.39310000   |
| O | -12.63790000 | -12.07480000 | -1.28150000  | P | -2.91580000  | 3.88290000   | 4.54470000   |
| O | -12.71230000 | 12.01190000  | -0.77110000  | P | -10.25870000 | 8.60160000   | 8.97050000   |
| O | 16.56720000  | -12.11090000 | 0.86900000   | P | 2.88730000   | -3.99930000  | 4.50580000   |
| O | 16.47640000  | 12.14580000  | 1.33270000   | P | 10.98040000  | -8.91060000  | 8.42990000   |
| O | 1.96890000   | -12.07260000 | 1.09670000   | P | 10.59880000  | -4.05550000  | -4.07800000  |
| O | 1.91570000   | 12.04790000  | 1.50570000   | P | 2.41570000   | -3.81000000  | -4.69580000  |
| O | -12.57840000 | -12.09750000 | 1.24520000   | P | -3.59560000  | -4.08810000  | -4.23370000  |
| O | -12.67500000 | 11.98790000  | 1.75400000   | P | -10.60460000 | -8.60550000  | -8.59270000  |
| O | 9.42490000   | 1.03620000   | 12.03720000  | H | 11.01340000  | -7.48480000  | -2.65790000  |
| O | 9.04070000   | 1.57140000   | -12.11370000 | H | 12.24800000  | -7.72640000  | -7.45410000  |
| O | -5.14390000  | 1.00530000   | 12.35390000  | H | 13.16080000  | -9.37480000  | -5.89530000  |
| O | -5.49220000  | 1.46230000   | -12.00860000 | H | 12.23450000  | 15.35430000  | -3.46800000  |
| O | 9.40800000   | -1.49260000  | 12.02360000  | H | -3.25000000  | -7.30800000  | -2.68160000  |
| O | 9.07900000   | -0.95530000  | -12.12580000 | H | -2.54040000  | -8.25740000  | -7.48280000  |
| O | -5.16000000  | -1.52560000  | 12.27670000  | H | -1.69410000  | -9.84870000  | -5.84480000  |
| O | -5.51190000  | -1.06370000  | -12.09410000 | H | -2.38220000  | 15.21020000  | -3.28120000  |
| C | 10.35740000  | -12.03180000 | -0.27900000  | H | -16.82500000 | -8.95870000  | -3.59660000  |
| C | 8.87210000   | -12.02610000 | -0.25200000  | H | -16.92780000 | 15.05960000  | -3.12240000  |
| C | 10.27500000  | 12.12630000  | 0.13110000   | H | 12.43850000  | -15.24920000 | 3.26560000   |
| C | 8.78980000   | 12.11060000  | 0.14070000   | H | 11.08280000  | 7.53330000   | 2.49140000   |
| C | -4.22340000  | -12.09290000 | -0.14430000  | H | 12.36650000  | 7.86930000   | 7.26900000   |
| C | -5.70800000  | -12.09430000 | -0.13350000  | H | 13.21260000  | 9.52430000   | 5.68040000   |
| C | -4.30430000  | 12.04250000  | 0.38290000   | H | -2.16530000  | -15.18600000 | 3.51650000   |
| C | -5.78940000  | 12.03340000  | 0.40660000   | H | -3.01190000  | 7.16360000   | 2.78010000   |
| C | -18.77900000 | -12.04960000 | 0.12910000   | H | -2.38880000  | 8.09270000   | 7.61100000   |
| C | -18.86540000 | 11.94930000  | 0.58410000   | H | -1.60960000  | 9.72560000   | 5.96710000   |
| C | 3.23090000   | -0.20390000  | 12.19680000  | H | -16.69080000 | -15.15430000 | 3.75800000   |
| C | 1.74710000   | -0.21570000  | 12.22630000  | H | -16.75920000 | 8.86200000   | 4.23000000   |
| C | 2.87430000   | 0.21730000   | -12.17190000 | H | 3.54880000   | -2.75370000  | 7.94810000   |
| C | 1.39130000   | 0.20180000   | -12.16600000 | H | 5.40320000   | -7.34550000  | 7.68460000   |
| C | -11.32490000 | -0.22480000  | 12.32770000  | H | 6.31210000   | -5.77000000  | 9.32650000   |
| C | -11.67230000 | 0.23800000   | -11.85540000 | H | 4.98210000   | -3.44280000  | -15.23430000 |
| C | 19.11520000  | -12.07120000 | -0.43820000  | H | -10.29550000 | -2.62270000  | 7.49660000   |
| C | 19.03280000  | 12.21830000  | 0.04400000   | H | -9.37080000  | -7.45260000  | 8.13420000   |
| C | 4.55320000   | -12.02710000 | -0.18810000  | H | -8.57300000  | -5.85050000  | 9.79850000   |
| C | 6.03870000   | -12.02280000 | -0.20610000  | H | -9.78280000  | -3.37270000  | -15.10080000 |
| C | 4.47160000   | 12.07610000  | 0.18410000   | H | 5.36370000   | 3.48500000   | 15.22350000  |
| C | 5.95680000   | 12.08550000  | 0.16300000   | H | 3.00750000   | 2.91410000   | -8.22640000  |
| C | -10.02410000 | -12.08930000 | -0.07510000  | H | 5.23240000   | 7.28910000   | -7.51410000  |
| C | -8.53970000  | -12.09190000 | -0.10070000  | H | 6.15170000   | 5.71610000   | -9.15050000  |



|   |              |              |              |   |              |              |              |
|---|--------------|--------------|--------------|---|--------------|--------------|--------------|
| H | -9.27380000  | 3.37710000   | 15.50000000  | H | 2.28140000   | -9.87570000  | -5.80700000  |
| H | -8.51100000  | 5.77200000   | -9.27990000  | H | 2.34830000   | 15.23270000  | -3.39400000  |
| H | -11.56990000 | 4.34020000   | -5.64910000  | H | -12.77910000 | -9.76880000  | -5.67320000  |
| H | -10.78430000 | 2.69710000   | -7.26910000  | H | -10.17530000 | -5.81070000  | -4.20510000  |
| H | 17.02090000  | -14.98160000 | -4.22100000  | H | -11.01690000 | -7.36920000  | -2.53830000  |
| H | 16.99340000  | 9.27450000   | -3.75440000  | H | -12.21290000 | 15.09490000  | -3.19120000  |
| H | 2.55130000   | -15.06290000 | -3.90580000  | H | 10.08680000  | 3.45650000   | 15.08850000  |
| H | 2.45670000   | 7.03400000   | -2.52550000  | H | 8.70100000   | 5.96860000   | -9.74470000  |
| H | 3.00570000   | 8.64470000   | -7.18350000  | H | 11.54030000  | 4.56740000   | -5.92930000  |
| H | 2.29310000   | 10.21360000  | -5.44390000  | H | 10.71200000  | 2.88530000   | -7.48040000  |
| H | -12.15370000 | -15.10990000 | -3.76200000  | H | -4.55450000  | 3.34510000   | 15.47760000  |
| H | -12.69890000 | 9.89820000   | -5.20660000  | H | -3.90730000  | 2.55510000   | -7.20150000  |
| H | -10.31310000 | 5.76700000   | -3.85310000  | H | -4.55960000  | 7.40920000   | -7.98420000  |
| H | -11.18570000 | 7.25680000   | -2.13710000  | H | -5.41130000  | 5.80770000   | -9.62240000  |
| H | 17.16750000  | -9.14110000  | 3.41810000   | H | 8.97960000   | -5.87950000  | 9.60590000   |
| H | 17.02930000  | 15.11740000  | 3.88480000   | H | 11.83670000  | -4.46990000  | 5.80630000   |
| H | 3.04340000   | -7.11830000  | 2.45140000   | H | 11.04340000  | -2.79750000  | 7.38780000   |
| H | 3.04260000   | -8.47140000  | 7.22210000   | H | 9.70380000   | -3.37340000  | -15.18830000 |
| H | 2.22710000   | -10.03820000 | 5.53150000   | H | -3.30990000  | -2.68360000  | 7.74410000   |
| H | 2.52640000   | 15.04280000  | 4.00760000   | H | -4.85820000  | -7.39260000  | 7.88700000   |
| H | -10.68860000 | -7.58250000  | 2.50850000   | H | -5.66120000  | -5.81220000  | 9.57450000   |
| H | -11.79320000 | -8.14880000  | 7.30920000   | H | -5.06230000  | -3.40230000  | -15.24710000 |
| H | -12.70460000 | -9.72210000  | 5.67590000   | H | 13.13010000  | -9.98830000  | 5.43380000   |
| H | -12.10420000 | 15.02740000  | 4.21560000   | H | 10.52070000  | -5.97800000  | 4.12920000   |
| H | 10.81620000  | 2.34190000   | 7.25110000   | H | 11.35550000  | -7.47010000  | 2.40130000   |
| H | 9.97030000   | 7.14650000   | 8.14040000   | H | 12.31340000  | 15.06990000  | 3.93390000   |
| H | 9.19820000   | 5.47690000   | 9.74850000   | H | -3.06640000  | -7.29050000  | 2.41860000   |
| H | 9.58890000   | 4.03690000   | -15.15540000 | H | -2.45480000  | -8.33920000  | 7.22690000   |
| H | -3.22970000  | 2.39720000   | 7.94610000   | H | -1.64040000  | -9.91370000  | 5.54660000   |
| H | -4.77910000  | 7.09730000   | 8.25420000   | H | -2.19700000  | 15.02660000  | 4.12200000   |
| H | -5.60010000  | 5.45170000   | 9.87170000   | H | -16.64880000 | -9.02580000  | 3.81310000   |
| H | -5.00370000  | 4.00170000   | -14.99470000 | H | -16.81720000 | 14.98980000  | 4.28790000   |
| H | 10.03480000  | -3.95470000  | 15.05100000  | H | 12.30590000  | -14.96390000 | -4.13550000  |
| H | 10.54290000  | -2.24750000  | -7.35040000  | H | 12.95390000  | 10.05560000  | -5.65260000  |
| H | 9.82530000   | -7.06340000  | -8.29040000  | H | 10.26370000  | 6.12530000   | -4.27020000  |
| H | 8.99280000   | -5.39800000  | -9.87180000  | H | 11.14720000  | 7.62280000   | -2.57010000  |
| H | -4.60060000  | -4.06040000  | 15.24780000  | H | -2.17090000  | -15.12200000 | -3.89260000  |
| H | -3.81970000  | -2.52000000  | -7.41760000  | H | -3.61080000  | 7.61650000   | -2.31960000  |
| H | -4.72640000  | -7.27910000  | -8.39870000  | H | -2.12980000  | 8.02850000   | -7.03490000  |
| H | -5.54420000  | -5.59380000  | -9.95870000  | H | -1.31200000  | 9.62830000   | -5.37390000  |
| H | 17.15230000  | -15.26480000 | 3.18340000   | H | -16.86680000 | -15.08640000 | -3.65140000  |
| H | 17.07690000  | 8.99340000   | 3.65140000   | H | -16.87160000 | 8.93260000   | -3.18120000  |
| H | 2.56020000   | -15.14980000 | 3.50190000   | H | 5.31870000   | -3.92430000  | 15.18320000  |
| H | 3.29140000   | 7.15820000   | 2.62100000   | H | 3.21210000   | -2.45530000  | -8.08340000  |
| H | 2.92710000   | 8.09040000   | 7.47730000   | H | 5.31130000   | -6.93920000  | -7.78500000  |
| H | 2.07410000   | 9.72910000   | 5.87580000   | H | 6.19870000   | -5.29310000  | -9.36650000  |
| H | -11.97900000 | -15.17840000 | 3.64400000   | H | -9.32650000  | -4.03090000  | 15.26980000  |
| H | -12.57790000 | 9.75460000   | 6.15120000   | H | -8.65020000  | -5.51110000  | -9.69580000  |
| H | -10.14230000 | 5.71410000   | 4.62450000   | H | -11.48350000 | -4.24120000  | -5.82970000  |
| H | -11.05090000 | 7.25240000   | 2.97350000   | H | -10.71870000 | -2.51520000  | -7.36760000  |
| H | 17.03690000  | -8.85740000  | -3.98680000  | H | 3.75980000   | 2.39160000   | 7.78390000   |
| H | 16.94760000  | 15.39840000  | -3.52050000  | H | 5.34310000   | 7.08630000   | 7.99080000   |
| H | 2.74390000   | -6.94710000  | -2.66430000  | H | 6.23690000   | 5.44480000   | 9.57200000   |
| H | 3.02550000   | -8.21880000  | -7.44780000  | H | 4.87070000   | 3.96700000   | -15.19580000 |

|   |              |              |              |   |              |              |              |
|---|--------------|--------------|--------------|---|--------------|--------------|--------------|
| H | -8.30320000  | 5.48240000   | 10.01650000  | O | 1.61380000   | -3.99610000  | 3.57690000   |
| H | -11.39840000 | 4.21270000   | 6.35620000   | O | 3.69370000   | -2.52030000  | 4.35270000   |
| H | -10.57600000 | 2.49650000   | 7.87440000   | O | 11.38840000  | -8.73730000  | 10.06240000  |
| H | -9.72310000  | 4.03510000   | -14.85140000 | O | 10.53070000  | -10.39770000 | 8.16360000   |
| H | 8.67240000   | -9.86380000  | -0.21060000  | O | 9.36630000   | -2.90120000  | -3.97680000  |
| H | 8.56740000   | 14.26980000  | 0.20560000   | O | 11.54940000  | -3.91230000  | -2.82890000  |
| H | -5.91010000  | -9.93130000  | -0.09250000  | O | 1.09110000   | -3.93380000  | -3.84960000  |
| H | -6.00500000  | 14.19360000  | 0.45700000   | O | 3.09170000   | -2.27770000  | -4.45780000  |
| H | 8.66480000   | -14.18750000 | -0.28600000  | O | -4.71230000  | -3.07770000  | -4.22560000  |
| H | 8.60550000   | 9.94740000   | 0.07740000   | O | -2.51280000  | -4.01720000  | -3.18330000  |
| H | -5.91180000  | -14.25570000 | -0.17190000  | O | -10.10810000 | -10.19550000 | -8.29720000  |
| H | -5.98060000  | 9.87030000   | 0.36110000   | O | -10.96440000 | -8.45000000  | -10.11940000 |
| H | 1.50750000   | -0.18340000  | 10.06720000  | O | -1.84100000  | -3.92770000  | 3.10360000   |
| H | 1.16880000   | 0.24590000   | -14.32510000 | O | -3.96830000  | -2.77180000  | 4.22040000   |
| H | 1.58100000   | -0.25510000  | 14.39090000  | P | -10.35250000 | -4.24020000  | 4.11720000   |
| H | 1.20940000   | 0.15430000   | -10.00070000 | P | -3.04760000  | -4.04920000  | 4.28290000   |
| H | 6.24180000   | -14.18520000 | -0.24750000  | H | 4.52020000   | -2.62790000  | 4.88780000   |
| H | 6.17730000   | 9.92620000   | 0.09740000   | H | 10.51970000  | -8.68760000  | 10.53540000  |
| H | -8.33920000  | -14.25390000 | -0.14360000  | H | 12.54540000  | 4.65570000   | 2.77990000   |
| H | -8.40680000  | 9.85590000   | 0.39070000   | H | 1.44710000   | 4.66550000   | 3.52580000   |
| H | 6.24300000   | -9.86150000  | -0.17110000  | H | -1.14770000  | 4.66490000   | 3.56800000   |
| H | 6.14340000   | 14.24870000  | 0.22550000   | H | -9.50190000  | 10.15750000  | 7.66720000   |
| H | -8.33420000  | -9.92970000  | -0.06380000  | H | -9.65150000  | 10.33410000  | -6.70660000  |
| H | -8.43100000  | 14.17920000  | 0.48660000   | H | -2.18460000  | 4.57710000   | -2.66320000  |
| H | -0.91380000  | -0.21190000  | 10.10560000  | H | 0.12780000   | 5.21760000   | -4.46240000  |
| H | -1.26290000  | 0.23390000   | -14.29830000 | H | 9.99590000   | 10.59610000  | -7.35060000  |
| H | -0.84820000  | -0.28340000  | 14.42940000  | H | 2.49670000   | -1.66030000  | -4.95360000  |
| H | -1.20850000  | 0.14280000   | -9.97390000  | H | 8.74310000   | -3.13350000  | -4.71070000  |
| H | -19.85990000 | -12.04430000 | 0.15490000   | C | -5.34420000  | -2.83510000  | -9.70530000  |
| H | -19.94640000 | 11.94110000  | 0.60040000   | C | -1.79280000  | -9.63020000  | -3.08600000  |
| H | -12.40600000 | -0.22000000  | 12.33130000  | C | -4.99750000  | -0.42500000  | -1.71570000  |
| H | -12.75290000 | 0.24430000   | -11.82270000 | N | -4.25030000  | -0.70130000  | -2.83820000  |
| H | 20.19610000  | -12.07490000 | -0.45770000  | C | -4.81220000  | 0.93680000   | -1.04850000  |
| H | 20.11380000  | 12.22870000  | 0.03240000   | H | -3.98930000  | 0.94410000   | -0.32610000  |
| H | 13.06470000  | -0.24470000  | 11.91200000  | H | -4.60270000  | 1.69970000   | -1.80200000  |
| H | 12.70890000  | 0.35620000   | -12.06800000 | H | -5.71970000  | 1.22750000   | -0.52020000  |
| O | -10.70190000 | 8.78350000   | -9.62420000  | C | -3.17330000  | -0.01620000  | -3.43850000  |
| O | -9.90240000  | 10.39750000  | -7.66260000  | C | -2.98510000  | -0.25300000  | -4.81640000  |
| O | -2.98460000  | 4.01360000   | -2.51110000  | C | -2.27610000  | 0.83720000   | -2.77420000  |
| O | -5.08450000  | 3.15530000   | -3.91820000  | C | -1.95430000  | 0.36990000   | -5.50840000  |
| O | 2.40010000   | 2.62620000   | -4.59430000  | H | -3.65660000  | -0.93770000  | -5.32390000  |
| O | 0.49920000   | 4.40920000   | -4.02690000  | C | -1.24350000  | 1.45590000   | -3.48380000  |
| O | 10.28930000  | 10.59550000  | -8.29650000  | H | -2.35520000  | 1.00810000   | -1.71060000  |
| O | 11.10490000  | 8.84620000   | -10.13030000 | C | -1.07790000  | 1.23740000   | -4.84920000  |
| O | 11.82810000  | 3.99450000   | 2.60940000   | H | -1.83380000  | 0.17540000   | -6.57060000  |
| O | 9.69670000   | 2.99800000   | 3.86210000   | H | -0.56130000  | 2.11060000   | -2.94850000  |
| O | 4.13380000   | 2.57410000   | 4.19580000   | H | -0.27520000  | 1.72600000   | -5.39340000  |
| O | 1.97440000   | 3.85730000   | 3.30350000   | C | -1.41980000  | -1.79250000  | -0.90120000  |
| O | -1.68660000  | 3.85490000   | 3.38300000   | C | -1.30630000  | -1.04960000  | 0.22150000   |
| O | -3.79820000  | 2.58490000   | 4.39930000   | C | -3.59470000  | -2.13660000  | -0.10290000  |
| O | -10.53700000 | 8.47640000   | 10.51680000  | N | -2.62120000  | -2.44020000  | -1.04620000  |
| O | -9.74840000  | 10.17720000  | 8.62620000   | H | -2.74760000  | -3.08570000  | -1.87180000  |
| O | -9.25060000  | -3.11500000  | 4.06070000   | H | -0.67470000  | -1.92770000  | -1.67420000  |
| O | -11.40850000 | -4.05230000  | 2.80920000   | H | -0.46600000  | -0.45300000  | 0.54430000   |

|   |             |             |             |   |              |              |             |
|---|-------------|-------------|-------------|---|--------------|--------------|-------------|
| S | -2.76490000 | -1.16220000 | 1.19580000  | C | -6.42060000  | -0.93750000  | -1.74540000 |
| C | -4.54250000 | -3.20880000 | 0.35540000  | C | -7.22330000  | -0.81910000  | -0.59530000 |
| C | -5.43270000 | -2.94930000 | 1.40790000  | C | -6.99900000  | -1.49190000  | -2.89940000 |
| C | -4.55390000 | -4.47260000 | -0.25100000 | C | -8.55460000  | -1.22470000  | -0.59910000 |
| C | -6.30000000 | -3.93770000 | 1.86400000  | H | -6.80490000  | -0.40690000  | 0.31820000  |
| H | -5.43970000 | -1.97250000 | 1.88570000  | C | -8.33300000  | -1.90050000  | -2.89940000 |
| C | -5.43580000 | -5.45570000 | 0.20130000  | H | -6.42100000  | -1.62300000  | -3.80370000 |
| H | -3.87850000 | -4.69730000 | -1.07000000 | C | -9.11860000  | -1.76630000  | -1.75610000 |
| C | -6.30540000 | -5.19670000 | 1.26030000  | H | -9.15120000  | -1.11790000  | 0.30290000  |
| H | -6.96910000 | -3.72470000 | 2.69210000  | H | -8.75440000  | -2.32360000  | -3.80710000 |
| H | -5.43570000 | -6.42980000 | -0.27930000 | H | -10.15870000 | -2.08060000  | -1.76410000 |
| H | -6.98470000 | -5.96770000 | 1.61350000  | H | -12.11300000 | -4.73300000  | 2.95510000  |
| H | -4.49450000 | -1.57450000 | -3.34580000 | H | -1.28540000  | -4.73800000  | 3.22740000  |
| H | -4.42200000 | -1.26480000 | -0.73060000 | H | -10.94650000 | -10.72240000 | -8.28030000 |
